# Supplementary material for: Enantioselective synthesis of trifluoromethyl substituted piperidines with multiple stereogenic centers via hydrogenation of pyridinium hydrochlorides
Source: Royal Society of Chemistry journal article supplement (doi:10.1039/c5qo00069f), 2015-01-01

## Supporting Information

### Enantioselective Synthesis of Trifluoromethyl Substituted Piperidines with Multiple Stereogenic Centers *via* Hydrogenation of Pyridinium Chlorides

Mu-Wang Chen, Zhi-Shi Ye, Zhang-Pei Chen, Bo Wu and Yong-Gui Zhou\*

*State Key Laboratory of Catalysis, Dalian Institute of Chemical Physics*

*Chinese Academy of Sciences, Dalian 116023, P. R. China*

Email: ygzhou@dicp.ac.cn

#### Table of Contents

|                                                                                                                    |        |
|--------------------------------------------------------------------------------------------------------------------|--------|
| 1. General and materials.....                                                                                      | S2-2   |
| 2. Typical procedure for synthesis of 6-alkyl-2-aryl-3-(trifluoromethyl)pyridines.....                             | S2-5   |
| 3. General procedure for asymmetric hydrogenation of 6-alkyl-2-aryl-3-(trifluoromethyl)–pyridinium salt 1·HCl..... | S5-8   |
| 4. The determination of the absolute configuration of 2b.....                                                      | S9-9   |
| 5. References.....                                                                                                 | S9-9   |
| 6. Copy of NMR for trifluoromethyl pyridines and trifluoromethyl piperidines.....                                  | S10-82 |
| 7. Copy of HPLC for racemic and chiral products.....                                                               | S83-96 |

## 1. General and materials:

**General:** All reactions were carried out under an atmosphere of nitrogen using standard Schlenk techniques, unless otherwise noted.  $^1\text{H}$  NMR and  $^{13}\text{C}$  NMR spectra were recorded at room temperature in  $\text{CDCl}_3$  on 400 MHz instrument with tetramethylsilane (TMS) as internal standard. Enantiomeric excess was determined by HPLC analysis, using chiral column described below in detail. Optical rotations were measured by polarimeter. Flash column chromatography was performed on silica gel (200-300 mesh). All reactions were monitored by TLC analysis.

**Materials:** Commercially available reagents were used throughout without further purification other than those detailed below. The solvents for asymmetric hydrogenation reaction were purchased without further purification.

## 2. Synthesis of 6-alkyl-2-aryl-3-(trifluoromethyl)pyridines:

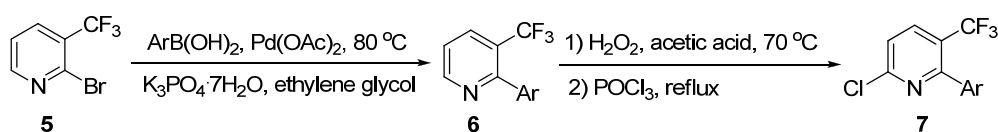

### General procedure for the synthesis of 6-chloro-2-aryl-3-(trifluoromethyl)pyridines:

Procedure one: A mixture of 2-bromo-3-(trifluoromethyl)pyridine **5** (10.0 mmol), arylboronic acid (15.0 mmol), Pd(OAc)<sub>2</sub> (0.5 mol%, 11.2 mg), K<sub>3</sub>PO<sub>4</sub>·7H<sub>2</sub>O (20.0 mmol, 6.768 g) and ethylene glycol (20.0 mL) was stirred at 80 °C for indicated time. The mixture was added to brine (30 mL). The mixture was extracted with diethyl ether (3×20 mL). The extracts were combined, dried over sodium sulfate, and evaporated under reduced pressure. The residue was purified by flash chromatography on silica gel (petroleum ether/ethyl acetate = 10/1) to yield the product **6**.<sup>[1]</sup>

Procedure two: Hydrogen peroxide (30%, 1.4 mL, 13 mmol) was added into the solution of the 2-aryl-3-(trifluoromethyl)pyridine **6** (10.0 mmol) in 10 mL of acetic acid. The reaction mixture was stirred at 70 °C for 72 h. The solvent was evaporated under vacuum, and the residue was basified with aqueous solution of sodium carbonate until pH = 9. The resulting mixture was extracted with chloroform (3×20 mL). The organic phase were combined and dried over anhydrous sodium sulfate, filtered and evaporated under vacuum. The residue was purified by flash chromatography on silica gel (dichloromethane/methanol = 15/1).<sup>[2]</sup>

Procedure three: 2-aryl-3-(trifluoromethyl)pyridine *N*-oxide (5.0 mmol) is taken up in excess phosphoryl chloride (10.0 mL). The mixture is refluxed for 4 h, cooled, poured into cold water (50.0 mL), basified with 10% aqueous ammonia solution (20 mL), and extracted with chloroform (2×50 mL). The organic phase were combined and dried over anhydrous sodium sulfate, filtered and evaporated under vacuum. The residue was purified by flash chromatography on silica gel (dichloromethane/methanol = 20/1) to yield the products **7a-7h**.<sup>[3]</sup> The 6-chloro-2-aryl-3-(trifluoromethyl) pyridines **7a-7d**, and **7f** are the known compounds.<sup>[4]</sup>

**6-Chloro-2-(naphthalen-2-yl)-3-(trifluoromethyl)pyridine (7e):** 54% yield, a yellow oil,  $R_f$  = 0.60 (petroleum ether/ethyl acetate = 20/1);  $^1\text{H}$  NMR (400 MHz,  $\text{CDCl}_3$ )  $\delta$  7.89-7.84 (m, 2H), 7.80-7.73 (m, 3H), 7.51 (dd,  $J$  = 8.5, 1.3 Hz, 1H), 7.44-7.35 (m, 2H), 7.26 (d,  $J$  = 8.3 Hz, 1H);  $^{13}\text{C}$  NMR (100 MHz,  $\text{CDCl}_3$ )  $\delta$  159.2 (d,  $J$  = 2.0 Hz), 153.6, 137.6 (q,  $J$  = 4.0 Hz), 135.2, 133.5, 132.7, 128.7 (d,  $J$  = 2.0 Hz), 128.7, 127.9, 127.8, 126.6, 126.1 (d,  $J$  = 1.0 Hz), 124.9, 123.9 (q,  $J$  = 32.0 Hz), 122.6, 122.1;  $^{19}\text{F}$  NMR (376 MHz,  $\text{CDCl}_3$ )  $\delta$  -56.8; HRMS (ESI)  $m/z$  Calculated for

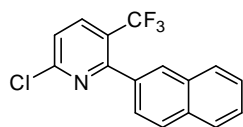

C<sub>16</sub>H<sub>10</sub>ClF<sub>3</sub>N [M+H]<sup>+</sup> 308.0448, found 308.0447.

**6-Chloro-3-(trifluoromethyl)-2-(4-(trifluoromethyl)phenyl)pyridine (7g):** 68% yield, white solid, mp = 61-62 °C, R<sub>f</sub> = 0.70 (petroleum ether/ ethyl acetate = 20/1); <sup>1</sup>H NMR (400 MHz, CDCl<sub>3</sub>) δ 8.06 (d, *J* = 8.4 Hz, 1H), 7.73 (d, *J* = 8.2 Hz, 2H), 7.64 (d, *J* = 8.1 Hz, 2H), 7.51 (d, *J* = 8.4 Hz, 1H); <sup>13</sup>C NMR (100 MHz, CDCl<sub>3</sub>) δ 157.8, 154.0, 141.3, 137.8 (q, *J* = 5.0 Hz), 131.6 (d, *J* = 33.0 Hz), 129.4 (q, *J* = 2.0 Hz), 128.7 (d, *J* = 77.0 Hz), 125.3 (q, *J* = 33.0 Hz), 124.2 (q, *J* = 33.0 Hz), 123.5, 122.3 (q, *J* = 79.0 Hz); <sup>19</sup>F NMR (376 MHz, CDCl<sub>3</sub>) δ -57.0, -62.9; HRMS (ESI) *m/z* Calculated for C<sub>13</sub>H<sub>7</sub>ClF<sub>6</sub>N [M+H]<sup>+</sup> 326.0166, found 326.0165.

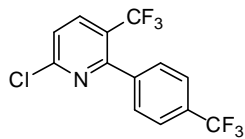

**6-Chloro-2-(3,5-difluorophenyl)-3-(trifluoromethyl)pyridine (7h):** 58% yield, yellow oil, R<sub>f</sub> = 0.59 (petroleum ether/ ethyl acetate = 20/1); <sup>1</sup>H NMR (400 MHz, CDCl<sub>3</sub>) δ 8.05 (d, *J* = 8.4 Hz, 1H), 7.52 (d, *J* = 8.4 Hz, 1H), 7.06 (d, *J* = 5.8 Hz, 2H), 7.00-6.92 (m, 1H); <sup>13</sup>C NMR (100 MHz, CDCl<sub>3</sub>) δ 162.6 (dd, *J* = 248.0, 13.0 Hz), 156.5, 153.9, 140.4, 137.7 (q, *J* = 4.8 Hz), 123.9 (q, *J* = 33.0 Hz), 123.6, 112.2 (d, *J* = 27.0 Hz), 105.2, 104.8 (d, *J* = 25.0 Hz); <sup>19</sup>F NMR (376 MHz, CDCl<sub>3</sub>) δ -57.2, -109.2; HRMS (ESI) *m/z* Calculated for C<sub>12</sub>H<sub>6</sub>ClF<sub>5</sub>N [M+H]<sup>+</sup> 294.0103, found 294.0100.

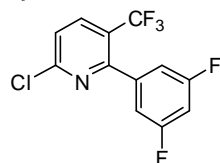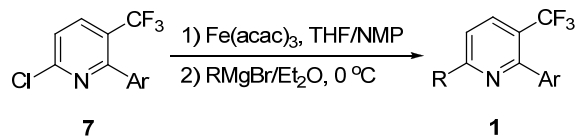

**General procedure for synthesis of 6-alkyl-2-aryl-3-(trifluoromethyl)pyridines:** RMgBr (3.6 mmol, 1.2 equiv.) was added to a solution of the corresponding 6-chloro-2-aryl-3-(trifluoromethyl)pyridine **7** (3.0 mmol) and Fe(acac)<sub>3</sub> (10 mol%) in THF/NMP (10.0 mL/mmol) cooled to 0 °C. The reaction mixture was stirred at 0 °C for 15 min and then quenched with brine. After extraction with dichloromethane, the combined organic layer was dried over anhydrous sodium sulfate, filtered and concentrated. The resulting crude product was purified by chromatography on silica gel (dichloromethane /methanol = 20/1) to afford the products **1**.<sup>[5]</sup>

**6-Methyl-2-phenyl-3-(trifluoromethyl)pyridine (1a):** 95% yield, yellow oil, R<sub>f</sub> = 0.30 (petroleum ether/ethyl acetate = 20/1); <sup>1</sup>H NMR (400 MHz, CDCl<sub>3</sub>) δ 7.92 (d, *J* = 8.1 Hz, 1H), 7.53-7.45 (m, 2H), 7.43 (dt, *J* = 4.3, 2.7 Hz, 3H), 7.23 (d, *J* = 8.0 Hz, 1H), 2.65 (s, 3H); <sup>13</sup>C NMR (100 MHz, CDCl<sub>3</sub>) δ 161.4, 157.9 (d, *J* = 2.0 Hz), 139.5, 134.9 (q, *J* = 5.0 Hz), 128.6, 128.0, 125.3, 122.2 (q, *J* = 32.0 Hz), 121.3, 119.9, 24.7; <sup>19</sup>F NMR (376 MHz, CDCl<sub>3</sub>) δ -57.0; HRMS (ESI) *m/z* Calculated for C<sub>13</sub>H<sub>11</sub>F<sub>3</sub>N [M+H]<sup>+</sup> 238.0838, found 238.0842.

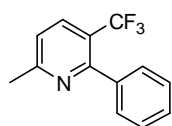

**6-Methyl-2-*p*-tolyl-3-(trifluoromethyl)pyridine (1b):** 80% yield, yellow oil, R<sub>f</sub> = 0.34 (petroleum ether/ethyl acetate = 30/1); <sup>1</sup>H NMR (400 MHz, CDCl<sub>3</sub>) δ 7.93 (d, *J* = 8.1 Hz, 1H), 7.39 (d, *J* = 7.6 Hz, 2H), 7.24 (t, *J* = 8.1 Hz, 3H), 2.66 (s, 3H), 2.41 (s, 3H); <sup>13</sup>C NMR (100 MHz, CDCl<sub>3</sub>) δ 161.3, 158.0, 138.5, 136.7, 134.9 (q, *J* = 5.0 Hz), 128.7, 128.6 (d, *J* = 1.0 Hz), 125.4, 122.0 (q, *J* = 32.0 Hz), 121.1, 24.6, 21.3; <sup>19</sup>F NMR (376 MHz, CDCl<sub>3</sub>) δ -57.0; HRMS (ESI) *m/z* Calculated for C<sub>14</sub>H<sub>13</sub>F<sub>3</sub>N [M+H]<sup>+</sup> 252.0995, found 252.1004.

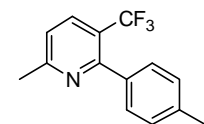

**6-Methyl-2-*m*-tolyl-3-(trifluoromethyl)pyridine (1c):** 74% yield, yellow oil, R<sub>f</sub> = 0.33 (petroleum ether/ethyl acetate = 30/1); <sup>1</sup>H NMR (400 MHz, CDCl<sub>3</sub>) δ 7.93 (d, *J* = 8.1 Hz, 1H),

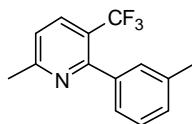

7.33-7.23 (m, 5H), 2.67 (s, 3H), 2.42 (s, 3H);  $^{13}\text{C}$  NMR (100 MHz,  $\text{CDCl}_3$ )  $\delta$  161.3 (d,  $J = 1.0$  Hz), 158.2 (d,  $J = 2.0$  Hz), 139.4, 137.6, 134.8 (q,  $J = 5.0$  Hz), 129.4, 129.3 (d,  $J = 1.0$  Hz), 127.8, 125.7 (d,  $J = 2.0$  Hz), 122.6, 122.1 (q,  $J = 32.0$  Hz), 121.2, 24.6, 21.4;  $^{19}\text{F}$  NMR (376 MHz,  $\text{CDCl}_3$ )  $\delta$  -57.0; HRMS (ESI)  $m/z$  Calculated for  $\text{C}_{14}\text{H}_{13}\text{F}_3\text{N}$   $[\text{M}+\text{H}]^+$  252.0995, found 252.0994.

**2-(4-Methoxyphenyl)-6-methyl-3-(trifluoromethyl)pyridine (1d):** 90% yield, yellow oil,  $R_f = 0.20$  (petroleum ether/ethyl acetate = 20/1);  $^1\text{H}$  NMR (400 MHz,  $\text{CDCl}_3$ )  $\delta$  7.91 (d,  $J = 8.1$  Hz, 1H), 7.45 (d,  $J = 8.6$  Hz, 2H), 7.21 (d,  $J = 8.1$  Hz, 1H), 7.04-6.87 (m, 2H), 3.85 (s, 3H), 2.65 (s, 3H);  $^{13}\text{C}$  NMR (100 MHz,  $\text{CDCl}_3$ )  $\delta$  161.3, 160.1, 157.6, 135.0 (q,  $J = 5.0$  Hz), 132.1, 130.1 (d,  $J = 2.0$  Hz), 125.4, 121.9 (q,  $J = 32.0$  Hz), 120.9, 113.5, 55.3, 24.7;  $^{19}\text{F}$  NMR (376 MHz,  $\text{CDCl}_3$ )  $\delta$  -57.0; HRMS (ESI)  $m/z$  Calculated for  $\text{C}_{14}\text{H}_{13}\text{F}_3\text{NO}$   $[\text{M}+\text{H}]^+$  268.0944, found 268.0953.

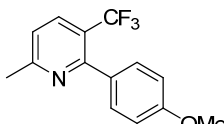

**6-Methyl-2-(naphthalen-2-yl)-3-(trifluoromethyl)pyridine (1e):** 77% yield, yellow oil,  $R_f = 0.40$  (petroleum ether/ethyl acetate = 30/1);  $^1\text{H}$  NMR (400 MHz,  $\text{CDCl}_3$ )  $\delta$  8.00-7.90 (m, 5H), 7.63 (d,  $J = 8.4$  Hz, 1H), 7.54-7.52 (m, 2H), 7.29 (d,  $J = 8.1$  Hz, 1H), 2.70 (s, 3H);  $^{13}\text{C}$  NMR (100 MHz,  $\text{CDCl}_3$ )  $\delta$  161.5, 157.9, 136.9, 135.0 (q,  $J = 5.0$  Hz), 133.3, 132.9, 128.5, 128.2 (d,  $J = 2.0$  Hz), 127.7 (d,  $J = 3.0$  Hz), 126.6, 126.3 (d,  $J = 8.0$  Hz), 125.4, 122.9, 122.4 (q,  $J = 32.0$  Hz), 121.9, 121.4, 24.7;  $^{19}\text{F}$  NMR (376 MHz,  $\text{CDCl}_3$ )  $\delta$  -56.9; HRMS (ESI)  $m/z$  Calculated for  $\text{C}_{17}\text{H}_{13}\text{F}_3\text{N}$   $[\text{M}+\text{H}]^+$  288.0995, found 288.0998.

**2-(Biphenyl-4-yl)-6-methyl-3-(trifluoromethyl)pyridine (1f):** 82% yield, yellow oil,  $R_f = 0.26$  (petroleum ether/ethyl acetate = 30/1);  $^1\text{H}$  NMR (400 MHz,  $\text{CDCl}_3$ )  $\delta$  7.95 (d,  $J = 8.1$  Hz, 1H), 7.72-7.61 (m, 4H), 7.58 (dd,  $J = 7.9, 4.0$  Hz, 2H), 7.45 (td,  $J = 7.6, 1.7$  Hz, 2H), 7.40-7.31 (m, 1H), 7.25 (d,  $J = 8.1$  Hz, 1H), 2.67 (s, 3H);  $^{13}\text{C}$  NMR (100 MHz,  $\text{CDCl}_3$ )  $\delta$  161.5, 157.6, 141.6, 140.8, 138.5, 135.0 (q,  $J = 48.0$  Hz), 129.1, 128.8, 127.5, 127.2, 126.8, 125.4, 122.3 (q,  $J = 32.0$  Hz), 121.3, 24.7;  $^{19}\text{F}$  NMR (376 MHz,  $\text{CDCl}_3$ )  $\delta$  -56.9; HRMS (ESI)  $m/z$  Calculated for  $\text{C}_{19}\text{H}_{15}\text{F}_3\text{N}$   $[\text{M}+\text{H}]^+$  314.1151, found 314.1155.

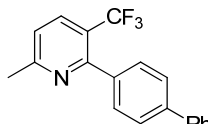

**6-Methyl-3-(trifluoromethyl)-2-(4-(trifluoromethyl)phenyl)pyridine (1g):** 83% yield, yellow oil,  $R_f = 0.50$  (petroleum ether/ethyl acetate = 20/1);  $^1\text{H}$  NMR (400 MHz,  $\text{CDCl}_3$ )  $\delta$  7.97 (d,  $J = 8.2$  Hz, 1H), 7.71 (d,  $J = 8.1$  Hz, 2H), 7.60 (d,  $J = 8.1$  Hz, 2H), 7.31 (d,  $J = 8.1$  Hz, 1H), 2.67 (s, 3H);  $^{13}\text{C}$  NMR (100 MHz,  $\text{CDCl}_3$ )  $\delta$  161.8, 156.4, 142.9, 135.0 (q,  $J = 5.0$  Hz), 130.8 (q,  $J = 32.0$  Hz), 129.1 (d,  $J = 16.0$  Hz), 125.4, 125.0 (q,  $J = 4.0$  Hz), 122.7, 122.4 (q,  $J = 12.0$  Hz), 122.0, 24.6;  $^{19}\text{F}$  NMR (376 MHz,  $\text{CDCl}_3$ )  $\delta$  -57.0, -62.8; HRMS (ESI)  $m/z$  Calculated for  $\text{C}_{14}\text{H}_{10}\text{F}_6\text{N}$   $[\text{M}+\text{H}]^+$  306.0712, found 306.0727.

**2-(3,5-Difluorophenyl)-6-methyl-3-(trifluoromethyl)pyridine (1h):** 77% yield, yellow oil,  $R_f = 0.60$  (petroleum ether/ethyl acetate = 30/1);  $^1\text{H}$  NMR (400 MHz,  $\text{CDCl}_3$ )  $\delta$  7.96 (d,  $J = 8.2$  Hz, 1H), 7.31 (d,  $J = 8.1$  Hz, 1H), 7.03 (dd,  $J = 7.8, 1.9$  Hz, 2H), 6.89 (tt,  $J = 8.9, 2.3$  Hz, 1H), 2.67 (s, 3H);  $^{13}\text{C}$  NMR (100 MHz,  $\text{CDCl}_3$ )  $\delta$  162.5 (dd,  $J = 247.0, 13.0$  Hz), 161.8, 155.3, 142.2 (t,  $J = 9.6$  Hz), 135.1 (q,  $J = 4.9$  Hz), 123.6 (q,  $J = 272.0$  Hz), 122.3 (q,  $J = 32.0$  Hz), 122.2, 112.2 (m, 1C), 104.2 (t,  $J = 25.0$  Hz), 24.6.  $^{19}\text{F}$  NMR (376 MHz,  $\text{CDCl}_3$ )  $\delta$  -57.2, -109.9; HRMS (ESI)  $m/z$  Calculated for  $\text{C}_{13}\text{H}_9\text{F}_5\text{N}$   $[\text{M}+\text{H}]^+$  274.0650, found 274.0642.

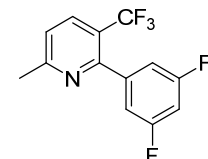

**6-Ethyl-2-phenyl-3-(trifluoromethyl)pyridine (1i):** 73% yield, yellow oil,  $R_f = 0.50$  (petroleum ether/ethyl acetate = 20/1);  $^1\text{H NMR}$  (400 MHz,  $\text{CDCl}_3$ )  $\delta$  7.94 (d,  $J = 8.2$  Hz, 1H), 7.50 (d,  $J = 4.7$  Hz, 2H), 7.46-7.38 (m, 3H), 7.24 (d,  $J = 8.1$  Hz, 1H), 2.92 (q,  $J = 7.6$  Hz, 2H), 1.34 (td,  $J = 7.6, 0.6$  Hz, 3H);  $^{13}\text{C NMR}$  (100 MHz,  $\text{CDCl}_3$ )  $\delta$  166.5, 157.9 (d,  $J = 2.0$  Hz), 139.7, 135.1 (q,  $J = 5.0$  Hz), 128.7 (d,  $J = 2.0$  Hz), 128.6, 127.9, 125.4, 122.2 (q,  $J = 32.0$  Hz) 112.0, 31.5, 13.7;  $^{19}\text{F NMR}$  (376 MHz,  $\text{CDCl}_3$ )  $\delta$  -56.9; HRMS (ESI)  $m/z$  Calculated for  $\text{C}_{14}\text{H}_{13}\text{F}_3\text{N}$   $[\text{M}+\text{H}]^+$  252.0995, found 252.1000.

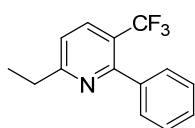

### 3. General procedure for asymmetric hydrogenation of 6-alkyl-2-aryl-3-(trifluoromethyl)pyridinium salts 1·HCl

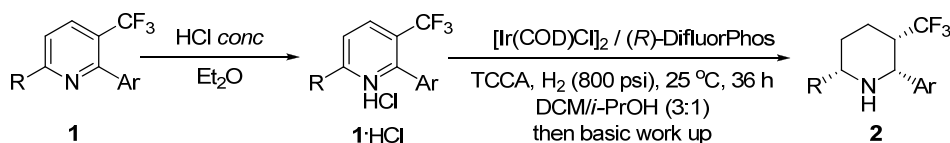

To a stirred solution of the substituted 6-alkyl-2-aryl-3-(trifluoromethyl)pyridine **1** (0.50 g, 2.4 mmol) in ether (10 mL) was added 1.0 mL of HCl *conc.* (or 2 *N* diethylether solution) at room temperature. A white solid formed immediately, and the reaction mixture was stirred at room temperature for around 30 min. All volatiles were removed under reduced pressure to give the corresponding 6-alkyl-2-aryl-3-(trifluoromethyl)pyridineium salt **1·HCl** as a white solid.

In a nitrogen-filled glove box, a mixture of  $[\text{Ir}(\text{cod})\text{Cl}]_2$  (2.1 mg, 0.0031 mmol) and (*R*)-DifluorPhos (4.7 mg, 0.0069 mmol) in dichloromethane/isopropanol (3:1, 1.0 mL) was stirred at room temperature for 15-20 min, the mixture was transferred by a syringe to a stainless steel autoclave, in which substrate **1·HCl** (0.20 mmol) and TCCA (2.9 mg, 0.0125 mmol) had been placed beforehand. Dichloromethane/isopropanol (3:1, 2.0 mL) was then added to the mixture. The hydrogenation was performed at 25 °C under 800 psi of hydrogen for 36 h. After carefully releasing the hydrogen, triethylamine (56  $\mu\text{L}$ , 0.40 mmol) was added and the mixture was stirred for 30 min. The organic layer was separated and extracted with dichloromethane twice, and the combined organic extracts were dried over sodium sulfate and concentrated in *vacuo*. Purification was performed on a silica gel column eluted with petroleum ether/ ethyl acetate to give the desired product **2**.

A mixture of benzoyl chloride (42 mg, 0.30 mmol) and triethylamine (56  $\mu\text{L}$ , 0.40 mmol) and **2** dissolved in 3 mL of dichloromethane was stirred at room temperature for 30 min. After concentrating in *vacuo*, the resulting precipitate was directly purified by column chromatography on silica gel using hexanes/ethyl acetate to give the corresponding *N*-4-benzoyl derivatives. The enantiomeric excesses were then determined by chiral HPLC.

**(2*R*,3*S*,6*R*)-6-Methyl-2-phenyl-3-(trifluoromethyl)piperidine (2a):** 95% yield, pale oil,  $R_f = 0.70$  (petroleum ether /ethyl acetate = 1/1), 90% ee,  $[\alpha]_D^{20} = + 54.0$  (*c* 0.50,  $\text{CHCl}_3$ );  $^1\text{H NMR}$  (400 MHz,  $\text{CDCl}_3$ )  $\delta$  7.36-7.31 (m, 4H), 7.29-7.23 (m, 1H), 4.11 (s, 1H), 2.99-2.76 (m, 1H), 2.65-2.44 (m, 1H), 2.36-2.17 (m, 1H), 1.99-1.70 (m, 1H), 1.65-1.30 (m, 3H), 1.19 (d,  $J = 6.3$  Hz, 3H);  $^{13}\text{C NMR}$  (100 MHz,  $\text{CDCl}_3$ )  $\delta$  141.6, 128.2, 127.5 (q,  $J = 282.0$  Hz), 127.1, 126.4, 61.3, 53.1, 42.6 (q,  $J = 2.0$  Hz), 29.4, 25.5 (q,  $J = 3.0$  Hz), 22.8;  $^{19}\text{F NMR}$  (376 MHz,  $\text{CDCl}_3$ )  $\delta$  -59.2; Enantiomeric excess was determined by HPLC for the corresponding benzamide (OJ-H, elute: Hexanes/*i*-PrOH = 90/10,

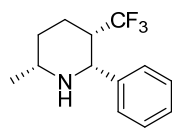

detector: 220 nm, flow rate: 1.0 mL/min), 30 °C,  $t_1 = 10.6$  min (maj),  $t_2 = 15.3$  min; HRMS (ESI)  $m/z$  Calculated for  $C_{13}H_{17}F_3N$   $[M+H]^+$  244.1308, found 244.1305.

**(2R,3S,6R)-6-Methyl-2-*p*-tolyl-3-(trifluoromethyl)piperidine (2b):** 95% yield, pale oil,  $R_f = 0.60$  (petroleum ether /ethyl acetate = 1/1), 89% ee,  $[\alpha]_D^{20} = +44.8$  ( $c$  0.54,  $CHCl_3$ );  $^1H$  NMR (400 MHz,  $CDCl_3$ )  $\delta$  7.24 (dd,  $J = 9.4, 4.5$  Hz, 2H), 7.13 (d,  $J = 6.4$  Hz, 2H), 4.09 (s, 1H), 2.85 (s, 1H), 2.52 (s, 1H), 2.30 (dd,  $J = 20.0, 8.1$  Hz, 4H), 1.82 (t,  $J = 14.2$  Hz, 1H), 1.55 (s, 2H), 1.46-1.31 (m, 1H), 1.19 (dd,  $J = 6.2, 2.6$  Hz, 3H);  $^{13}C$  NMR (100 MHz,  $CDCl_3$ )  $\delta$  138.6, 136.6, 128.8, 127.5 (q,  $J = 282.0$  Hz), 126.3, 61.1, 53.2, 42.6 (q,  $J = 22.0$  Hz), 29.4, 25.4 (q,  $J = 2.0$  Hz), 22.8, 21.1;  $^{19}F$  NMR (376 MHz,  $CDCl_3$ )  $\delta$  -59.2; Enantiomeric excess was determined by HPLC for the corresponding benzamide (AD-H, elute: Hexanes/*i*-PrOH = 90/10, detector: 220 nm, flow rate: 1.0 mL/min), 30 °C,  $t_1 = 11.4$  min,  $t_2 = 13.0$  min (maj); HRMS (ESI)  $m/z$  Calculated for  $C_{14}H_{19}F_3N$   $[M+H]^+$  258.1464, found 258.1463.

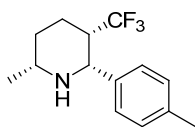

**(2R,3S,6R)-6-Methyl-2-*m*-tolyl-3-(trifluoromethyl)piperidine (2c):** 84% yield, pale oil,  $R_f = 0.61$  (petroleum ether /ethyl acetate = 1/1), 88% ee,  $[\alpha]_D^{20} = +50.4$  ( $c$  0.54,  $CHCl_3$ );  $^1H$  NMR (400 MHz,  $CDCl_3$ )  $\delta$  7.23-7.05 (m, 4H), 4.10 (s, 1H), 2.86 (s, 1H), 2.56-2.53 (m, 1H), 2.35 (s, 3H), 2.31-2.27 (m, 1H), 1.83 (t,  $J = 14.2$  Hz, 1H), 1.57 (s, 2H), 1.46-1.31 (m, 1H), 1.19 (d,  $J = 6.2, 3H$ );  $^{13}C$  NMR (100 MHz,  $CDCl_3$ )  $\delta$  141.5, 137.7, 131.7, 128.0, 127.8, 127.5 (q,  $J = 282.0$  Hz), 127.0, 61.3, 53.2, 42.6 (q,  $J = 22.0$  Hz), 29.5, 25.5 (q,  $J = 3.0$  Hz), 22.8, 21.4;  $^{19}F$  NMR (376 MHz,  $CDCl_3$ )  $\delta$  -59.2; Enantiomeric excess was determined by HPLC for the corresponding benzamide (AD-H, elute: Hexanes/*i*-PrOH = 90/10, detector: 220 nm, flow rate: 1.0 mL/min), 30 °C,  $t_1 = 7.6$  min,  $t_2 = 8.8$  min (maj); HRMS (ESI)  $m/z$  Calculated for  $C_{14}H_{19}F_3N$   $[M+H]^+$  258.1464, found 258.1464.

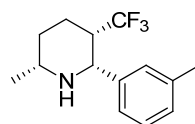

**(2R,3S,6R)-2-(4-Methoxyphenyl)-6-methyl-3-(trifluoromethyl)piperidine (2d):** 94% yield, pale oil,  $R_f = 0.50$  (petroleum ether /ethyl acetate = 1/1), 88% ee,  $[\alpha]_D^{20} = +55.5$  ( $c$  0.64,  $CHCl_3$ );  $^1H$  NMR (400 MHz,  $CDCl_3$ )  $\delta$  7.26 (d,  $J = 8.7$  Hz, 2H), 6.85 (d,  $J = 8.7$  Hz, 2H), 4.07 (s, 1H), 3.79 (s, 3H), 2.85 (s, 1H), 2.48 (dd,  $J = 9.6, 4.5$  Hz, 1H), 2.27 (ddd,  $J = 5.9, 3.5, 1.7$  Hz, 1H), 1.88-1.75 (m, 1H), 1.55 (d,  $J = 11.9$  Hz, 2H), 1.37 (d,  $J = 13.6$  Hz, 1H), 1.18 (d,  $J = 6.3$  Hz, 3H);  $^{13}C$  NMR (100 MHz,  $CDCl_3$ )  $\delta$  158.7, 133.8, 127.5 (q,  $J = 282.0$  Hz), 127.4, 113.6, 60.8, 55.2, 53.2, 42.6 (q,  $J = 22.0$  Hz), 29.4, 25.4 (q,  $J = 2.0$  Hz), 22.8;  $^{19}F$  NMR (376 MHz,  $CDCl_3$ )  $\delta$  -59.2; Enantiomeric excess was determined by HPLC for the corresponding benzamide (AD-H, elute: Hexanes/*i*-PrOH = 90/10, detector: 220 nm, flow rate: 1.0 mL/min), 30 °C,  $t_1 = 13.7$  min,  $t_2 = 18.5$  min (maj); HRMS (ESI)  $m/z$  Calculated for  $C_{14}H_{19}F_3NO$   $[M+H]^+$  274.1413, found 274.1418.

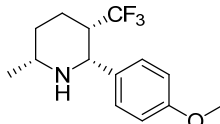

**(2R,3S,6R)-6-Methyl-2-(naphthalen-2-yl)-3-(trifluoromethyl)piperidine (2e):** 93% yield, pale oil,  $R_f = 0.65$  (petroleum ether /ethyl acetate = 1/1), 89% ee,  $[\alpha]_D^{20} = +75.3$  ( $c$  0.68,  $CHCl_3$ );  $^1H$  NMR (400 MHz,  $CDCl_3$ )  $\delta$  7.82 (dd,  $J = 13.2, 7.7$  Hz, 4H), 7.45 (dd,  $J = 11.5, 5.6$  Hz, 3H), 4.29 (s, 1H), 2.93 (s, 1H), 2.70-2.67 (m, 1H), 2.33 (d,  $J = 14.4$  Hz, 1H), 1.90 (t,  $J = 13.7$  Hz, 1H), 1.72-1.56 (m, 2H), 1.53-1.27 (m, 1H), 1.26 (d,  $J = 6.2$  Hz, 3H);  $^{13}C$  NMR (100 MHz,  $CDCl_3$ )  $\delta$  139.1, 133.4, 132.7, 128.9, 128.0, 127.6 (d,  $J = 7.5$  Hz), 127.5 (q,  $J = 282.0$  Hz), 126.0, 125.7, 125.0, 124.7, 61.3, 53.2, 42.5 (q,  $J = 22.0$  Hz), 29.5, 25.5 (q,  $J = 2.0$  Hz), 22.8;  $^{19}F$  NMR (376 MHz,  $CDCl_3$ )  $\delta$  -59.2; Enantiomeric excess was determined by HPLC for the corresponding benzamide (AD-H, elute: Hexanes/*i*-PrOH = 90/10, detector: 220 nm, flow rate: 1.0 mL/min), 30 °C,  $t_1 =$

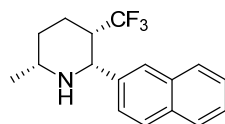

13.0 min,  $t_2 = 16.8$  min (maj); HRMS (ESI)  $m/z$  Calculated for  $C_{17}H_{18}F_3N$   $[M+H]^+$  294.1464, found 294.1472.

**(2*R*,3*S*,6*R*)-2-(Biphenyl-4-yl)-6-methyl-3-(trifluoromethyl)piperidine (2f):** 90% yield, pale solid, mp = 135-136 °C,  $R_f = 0.62$  (petroleum ether /ethyl acetate = 1/1), 87% ee,  $[\alpha]_D^{20} = +55.5$  ( $c$  0.70,  $CHCl_3$ );  $^1H$  NMR (400 MHz,  $CDCl_3$ )  $\delta$  7.60-7.53 (m, 4H), 7.43-7.40 (m, 4H), 7.32 (t,  $J = 7.3$  Hz, 1H), 4.16 (s, 1H), 2.87 (s, 1H), 2.63-2.49 (m, 1H), 2.36-2.24 (m, 1H), 1.85 (t,  $J = 14.1$  Hz, 1H), 1.67-1.53 (m, 2H), 1.42 (t,  $J = 12.4$  Hz, 1H), 1.20 (d,  $J = 6.3$  Hz, 3H);  $^{13}C$  NMR (100 MHz,  $CDCl_3$ )  $\delta$  140.9, 140.7, 140.0, 128.8, 128.7, 127.5 (q,  $J = 282.0$  Hz) 127.2, 127.0, 126.9, 61.1, 53.2, 42.6 (q,  $J = 22.0$  Hz), 29.4, 25.4 (q,  $J = 2.0$  Hz), 22.8;  $^{19}F$  NMR (376 MHz,  $CDCl_3$ )  $\delta$  -59.1; Enantiomeric excess was determined by HPLC for the corresponding benzamide (AD-H, elute: Hexanes/*i*-PrOH = 90/10, detector: 220 nm, flow rate: 1.0 mL/min), 30 °C,  $t_1 = 13.0$  min,  $t_2 = 18.3$  min (maj); HRMS (ESI)  $m/z$  Calculated for  $C_{19}H_{20}F_3N$   $[M+H]^+$  320.1621, found 320.1620.

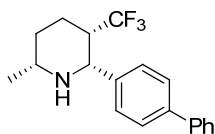

**(2*R*,3*S*,6*R*)-6-Methyl-3-(trifluoromethyl)-2-(4-(trifluoromethyl)phenyl)piperidine (2g):** 90% yield, pale oil,  $R_f = 0.48$  (petroleum ether /ethyl acetate = 1/1), 86% ee,  $[\alpha]_D^{20} = +57.8$  ( $c$  0.58,  $CHCl_3$ );  $^1H$  NMR (400 MHz,  $CDCl_3$ )  $\delta$  7.58 (d,  $J = 8.3$  Hz, 2H), 7.48 (d,  $J = 8.2$  Hz, 2H), 4.18 (s, 1H), 2.90-2.85 (m, 1H), 2.57-2.54 (m, 1H), 2.34-2.28 (m, 1H), 1.94-1.77 (m, 1H), 1.65-1.57 (m, 2H), 1.47-1.31 (m, 1H), 1.20 (d,  $J = 6.2$  Hz, 3H);  $^{13}C$  NMR (100 MHz,  $CDCl_3$ )  $\delta$  145.8 (d,  $J = 1.0$  Hz), 129.4 (t,  $J = 32.0$  Hz), 127.4 (q,  $J = 281.0$  Hz), 127.0 (d,  $J = 1.0$  Hz), 125.3 (q,  $J = 4.0$  Hz), 124.3 (q,  $J = 271.0$  Hz), 61.0, 53.2, 42.6 (q,  $J = 22.0$  Hz), 29.4, 25.5 (q,  $J = 3.0$  Hz), 22.9;  $^{19}F$  NMR (376 MHz,  $CDCl_3$ )  $\delta$  -59.2, -62.5; Enantiomeric excess was determined by HPLC for the corresponding benzamide (AD-H, elute: Hexanes/*i*-PrOH = 90/10, detector: 220 nm, flow rate: 1.0 mL/min), 30 °C,  $t_1 = 7.5$  min,  $t_2 = 14.0$  min (maj); HRMS (ESI)  $m/z$  Calculated for  $C_{14}H_{16}F_6N$   $[M+H]^+$  312.1187, found 312.1179.

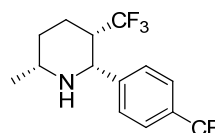

**(2*R*,3*S*,6*R*)-2-(3,5-Difluorophenyl)-6-methyl-3-(trifluoromethyl)piperidine (2h):** 72% yield, pale oil,  $R_f = 0.61$  (petroleum ether /ethyl acetate = 1/1), 87% ee,  $[\alpha]_D^{20} = +62.5$  ( $c$  0.36,  $CHCl_3$ );  $^1H$  NMR (400 MHz,  $CDCl_3$ )  $\delta$  6.95-6.87 (m, 2H), 6.71-6.66 (m, 1H), 4.10 (d,  $J = 1.1$  Hz, 1H), 2.86-2.82 (m, 1H), 2.54-2.49 (m, 1H), 2.37-2.23 (m, 1H), 1.92-1.73 (m, 1H), 1.63-1.52 (m, 1H), 1.44-1.35 (m, 2H), 1.19 (d,  $J = 6.3$  Hz, 3H);  $^{13}C$  NMR (100 MHz,  $CDCl_3$ )  $\delta$  163.0 (dd,  $J = 246.0, 13.0$  Hz), 145.8 (t,  $J = 9.0$  Hz), 127.2 (q,  $J = 282.0$  Hz), 109.4 (dd,  $J = 18.0, 7.0$  Hz), 102.5 (t,  $J = 25.0$  Hz), 60.4, 52.9, 42.4 (q,  $J = 3.0$  Hz), 29.2, 25.2 (q,  $J = 3.0$  Hz), 22.7;  $^{19}F$  NMR (376 MHz,  $CDCl_3$ )  $\delta$  -59.4, 110.2; Enantiomeric excess was determined by HPLC for the corresponding benzamide (OD-H, elute: Hexanes/*i*-PrOH = 90/10, detector: 220 nm, flow rate: 1.0 mL/min), 30 °C,  $t_1 = 3.9$  min (maj),  $t_2 = 4.7$  min; HRMS (ESI)  $m/z$  Calculated for  $C_{13}H_{15}F_5N$   $[M+H]^+$  280.1119, found 280.1124.

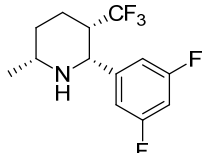

**(2*R*,3*S*,6*R*)-6-Ethyl-2-phenyl-3-(trifluoromethyl)piperidine (2i):** 82% yield, pale oil,  $R_f = 0.64$  (petroleum ether /ethyl acetate = 1/1), 87% ee,  $[\alpha]_D^{20} = +52.1$  ( $c$  0.48,  $CHCl_3$ );  $^1H$  NMR (400 MHz,  $CDCl_3$ )  $\delta$  7.38-7.30 (m, 4H), 7.28-7.21 (m, 1H), 4.11 (s, 1H), 2.65-2.52 (m, 2H), 2.32-2.27 (m, 1H), 1.85-1.39 (m, 5H), 0.96 (t,  $J = 7.5$  Hz, 3H);  $^{13}C$  NMR (100 MHz,  $CDCl_3$ )  $\delta$  141.7, 128.2, 127.5 (q,  $J = 282.0$  Hz), 127.1, 126.4 (d,  $J = 1.0$  Hz), 61.3, 59.1, 43.1 (q,  $J = 22.0$  Hz), 29.8, 27.1, 25.4 (q,  $J = 2.0$  Hz), 10.2;  $^{19}F$  NMR (376 MHz,  $CDCl_3$ )  $\delta$  -59.3; Enantiomeric excess was determined by HPLC for

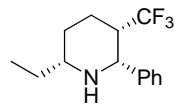

the corresponding benzamide (AD-H, elute: Hexanes/*i*-PrOH = 90/10, detector: 220 nm, flow rate: 1.0 mL/min), 30 °C,  $t_1 = 7.5$  min,  $t_2 = 8.8$  min (maj); HRMS (ESI)  $m/z$  Calculated for  $C_{14}H_{19}F_3N$   $[M+H]^+$  258.1464, found 258.1473.

**(2*R*,6*R*)-2-Methyl-6-phenylpiperidine (4a):** 89% conv., pale oil,  $R_f = 0.16$  (Dichloromethane/MeOH = 15/1), 78% ee,  $[\alpha]_D^{20} = +38.0$  ( $c$  0.20,  $CHCl_3$ ), Lit:<sup>[6]</sup> ((+)-(2*R*, 6*R*):

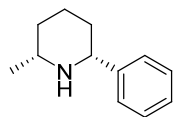

$[\alpha]_D^{20} = +22.17$  ( $c$  0.69, EtOH)<sup>[6a]</sup>; (-)-(2*S*, 6*S*):  $[\alpha]_D^{25} = -22.4$  ( $c$  0.80,  $CHCl_3$ ) (for an ee of 80%)<sup>[6b]</sup>;  $^1H$  NMR (400 MHz,  $CDCl_3$ )  $\delta$  7.39-7.32 (m, 2H), 7.30 (dd,  $J = 8.1, 6.7$  Hz, 2H), 7.24 (dd,  $J = 4.9, 3.6$  Hz, 1H), 3.66 (dd,  $J = 10.7, 2.4$

Hz, 1H), 2.84-2.77 (m, 1H), 1.93-1.80 (m, 2H), 1.80-1.69 (m, 1H), 1.64 (dd,  $J = 8.5, 4.5$  Hz, 1H), 1.55-1.41 (m, 2H), 1.18-1.15 (m, 1H), 1.11 (d,  $J = 6.3$  Hz, 3H);  $^{13}C$  NMR (100 MHz,  $CDCl_3$ )  $\delta$  145.5, 128.5, 127.2, 126.9, 62.7, 53.4, 34.3, 34.0, 25.5, 23.2; Enantiomeric excess was determined by HPLC for the corresponding benzamide (OJ-H, elute: Hexanes/*i*-PrOH = 90/10, detector: 220 nm, flow rate: 1.0 mL/min), 30 °C,  $t_1 = 11.2$  min,  $t_2 = 17.2$  min (maj).

**(2*R*,6*R*)-2-Methyl-6-(4-(trifluoromethyl)phenyl)piperidine (4b):** 83% conv., pale oil,  $R_f = 0.10$  (ethyl acetate), 79% ee,  $[\alpha]_D^{20} = +17.4$  ( $c$  0.46,  $CHCl_3$ ), Lit:<sup>[6b]</sup> ((-)-(2*S*, 6*S*):  $[\alpha]_D^{25} = -15.3$  ( $c$  0.77,  $CHCl_3$ ) (for an ee of 55%)<sup>[6b]</sup>;  $^1H$  NMR (400 MHz,  $CDCl_3$ )  $\delta$  7.56 (d,  $J = 8.3$  Hz, 2H), 7.50 (d,  $J = 8.2$  Hz, 2H), 3.73 (dd,  $J = 10.9, 2.3$  Hz, 1H),

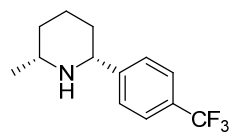

2.86-2.78 (m, 1H), 1.95-1.62 (m, 4H), 1.59-1.35 (m, 2H), 1.24-1.15 (m, 1H), 1.12 (d,  $J = 6.2$  Hz, 3H);  $^{13}C$  NMR (100 MHz,  $CDCl_3$ )  $\delta$  149.6, 129.4 (q,  $J = 32.0$  Hz), 127.3, 125.4 (q,  $J = 4.0$  Hz), 124.4 (q,  $J = 270.0$  Hz), 62.2, 53.2, 34.6, 33.8, 25.4, 23.1;  $^{19}F$  NMR (376 MHz,  $CDCl_3$ )  $\delta$  -62.4; Enantiomeric excess was determined by HPLC for the corresponding benzamide (OG, elute: Hexanes/*i*-PrOH = 90/10, detector: 220 nm, flow rate: 1.0 mL/min), 30 °C,  $t_1 = 8.3$  min,  $t_2 = 10.7$  min (maj).

**(2*R*,6*R*)-2-(3,5-Difluorophenyl)-6-methylpiperidine (4c):** [CAS: 1341965-51-2]; 93% conv., pale oil,  $R_f = 0.30$  (ethyl acetate), 79% ee,  $[\alpha]_D^{20} = +27.1$  ( $c$  0.42,  $CHCl_3$ );  $^1H$  NMR (400

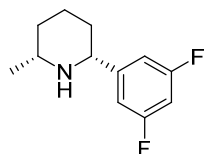

MHz,  $CDCl_3$ )  $\delta$  6.99-6.85 (m, 2H), 6.68-6.63 (m, 1H), 3.64 (dd,  $J = 11.0, 2.1$  Hz, 1H), 2.82-2.75 (m, 1H), 1.94-1.58 (m, 4H), 1.56-1.28 (m, 2H), 1.20-1.07 (m, 4H);  $^{13}C$  NMR (100 MHz,  $CDCl_3$ )  $\delta$  163.2 (dd,  $J = 246.0, 13.0$  Hz), 109.7 (d,  $J = 6.0$ ), 109.5 (d,  $J = 6.0$ ), 102.3 (t,  $J = 25.4$  Hz), 61.8 (t,  $J = 2.0$  Hz), 53.1, 34.5, 33.8, 25.3, 23.2;  $^{19}F$  NMR (376 MHz,  $CDCl_3$ )  $\delta$  -110.3; Enantiomeric excess was determined by HPLC for the corresponding benzamide (OJ-H, elute: Hexanes/*i*-PrOH = 95/5, detector: 220 nm, flow rate: 1.0 mL/min), 30 °C,  $t_1 = 11.4$  min,  $t_2 = 13.1$  min (maj).

**(2*R*,6*R*)-2-Methyl-6-(naphthalen-1-yl)piperidine (4d):** [CAS: 1488821-66-4]; >95% conv., pale oil,  $R_f = 0.15$  (ethyl acetate), 64% ee,  $[\alpha]_D^{20} = +21.7$  ( $c$  0.48,  $CHCl_3$ );  $^1H$  NMR (400

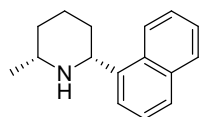

MHz,  $CDCl_3$ )  $\delta$  8.17 (d,  $J = 8.3$  Hz, 1H), 7.88 (d,  $J = 8.0$  Hz, 1H), 7.76 (d,  $J = 7.7$  Hz, 2H), 7.59-7.40 (m, 3H), 4.48 (d,  $J = 10.2$  Hz, 1H), 3.02-2.97 (m, 1H), 2.20-1.89 (m, 3H), 1.83-1.52 (m, 3H), 1.37-1.23 (m, 1H), 1.19 (d,  $J = 6.2$  Hz, 3H);  $^{13}C$  NMR (100 MHz,  $CDCl_3$ )  $\delta$  141.0, 134.0, 131.0, 129.2, 127.5, 126.0, 126.0, 125.5, 123.3, 123.1, 57.9, 53.9, 34.3, 33.6, 25.8, 23.3; Enantiomeric excess was determined by HPLC for the corresponding benzamide (OD-H, elute: Hexanes/*i*-PrOH = 90/10, detector: 220 nm, flow rate: 1.0 mL/min), 30 °C,  $t_1 = 8.3$  min (maj),  $t_2 = 10.0$  min.



#### 4. The determination of the absolute configuration of **2f**

The absolute configuration of hydrogenation product 2-(biphenyl-4-yl)-6-methyl-3-(trifluoromethyl)piperidine **2f** [87% ee,  $[\alpha]_D^{20} = +55.5$  ( $c$  0.70,  $\text{CHCl}_3$ )] was determined by X-ray diffraction analysis by recrystallization from mixture solvent of dichloromethane/*n*-hexane to upgrade ee to >99%. The configurations of the other chiral products are assigned by analogy. CCDC 1009006 contains the structure and supplementary crystallographic data for the structure of (2*R*,3*S*,6*R*)-2-(biphenyl-4-yl)-6-methyl-3-(trifluoromethyl)piperidine **2f**. These data can be obtained free of charge *via* [www.ccdc.com.ac.uk/data\\_request/cif](http://www.ccdc.com.ac.uk/data_request/cif) from the Cambridge Crystallographic Data Centre.

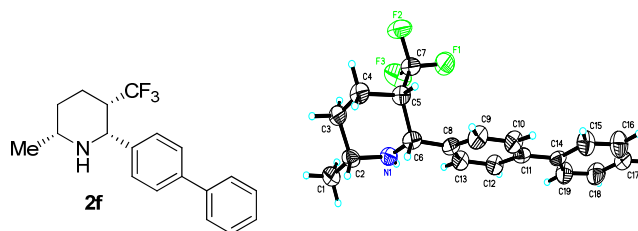

**Figure 1.** The X-ray structure of (2*R*,3*S*,6*R*)-2-(biphenyl-4-yl)-6-methyl-3-(trifluoromethyl)piperidine **2f**.

#### 5. References

- [1] Liu, C.; Han, N.; Song, X.; Qiu, J. *Eur. J. Org. Chem.* **2010**, 5548.
- [2] Wu, J.; Cui, X.; Chen, L.; Jiang, G.; Wu, Y. *J. Am. Chem. Soc.* **2009**, *131*, 13888.
- [3] Sharma, K. S.; Kumari, S.; Sing, R. P. *Synthesis* **1981**, 316.
- [4] Ahmed, S.; Sharif, M. Shoaib, K.; Reimann, S.; Iqbal, J.; Patonay, T.; Spannenberg, A.; Langer, P. *Tetrahedron Lett.* **2013**, *54*, 1699
- [5] Vandromme, L.; Reißig, H.-U.; Gröper, S.; Rabe, J. P. *Eur. J. Org. Chem.* **2008**, 2049.
- [6] (a) Katritzky, A. R.; Qiu, G.; Yang, B.; Steel, P. J. *J. Org. Chem.* **1998**, *63*, 6699; (b) Kita, Y.; Iimuro, A.; Hida, S.; Mashima, K. *Chem. Lett.* **2014**, *43*, 284.

## 6.1 Copy of NMR for trifluoromethyl pyridines

7.8904  
7.8625  
7.8415  
7.7979  
7.7760  
7.7560  
7.7506  
7.7319  
7.7180  
7.5148  
7.4968  
7.4937  
7.4039  
7.3995  
7.3902  
7.3804  
7.3768  
7.2706  
7.2499

<sup>1</sup>H NMR MC-9-44A in CDCl<sub>3</sub>

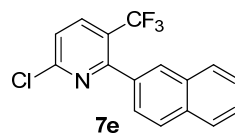

<sup>1</sup>H NMR (400 MHz, CDCl<sub>3</sub>)

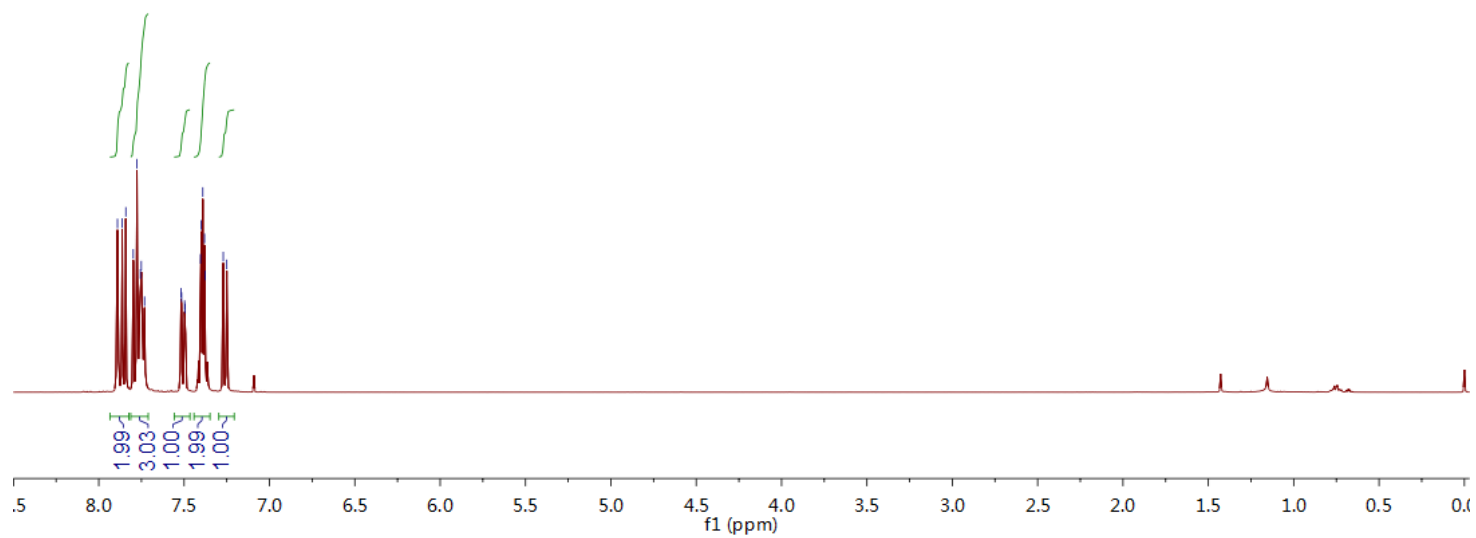

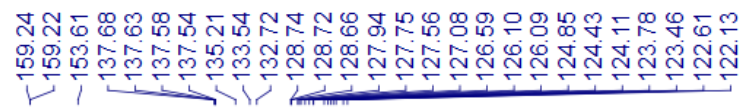

<sup>13</sup>C NMR MC-9-44A in CDCl<sub>3</sub>

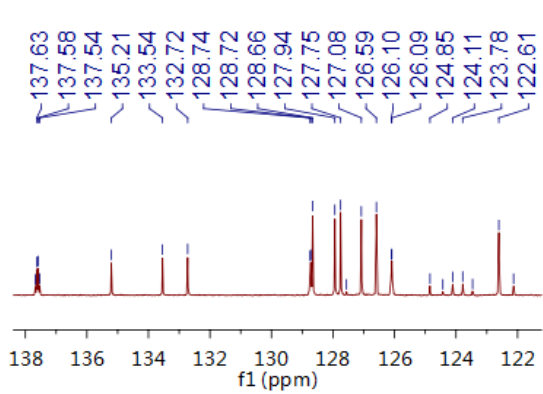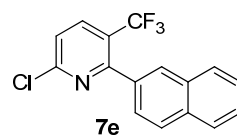

<sup>13</sup>C NMR (100 MHz, CDCl<sub>3</sub>)

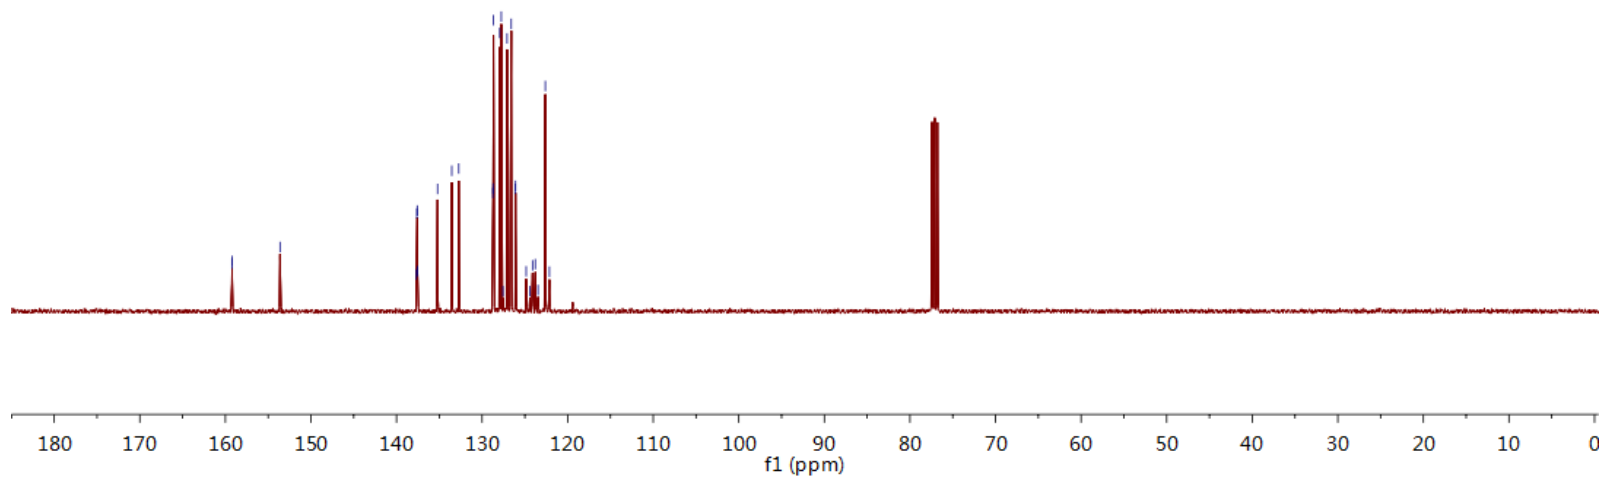

<sup>19</sup>F NMR MC-9-44A in CDCl<sub>3</sub>

—56.8216

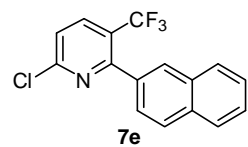

<sup>19</sup>F NMR (376 MHz, CDCl<sub>3</sub>)

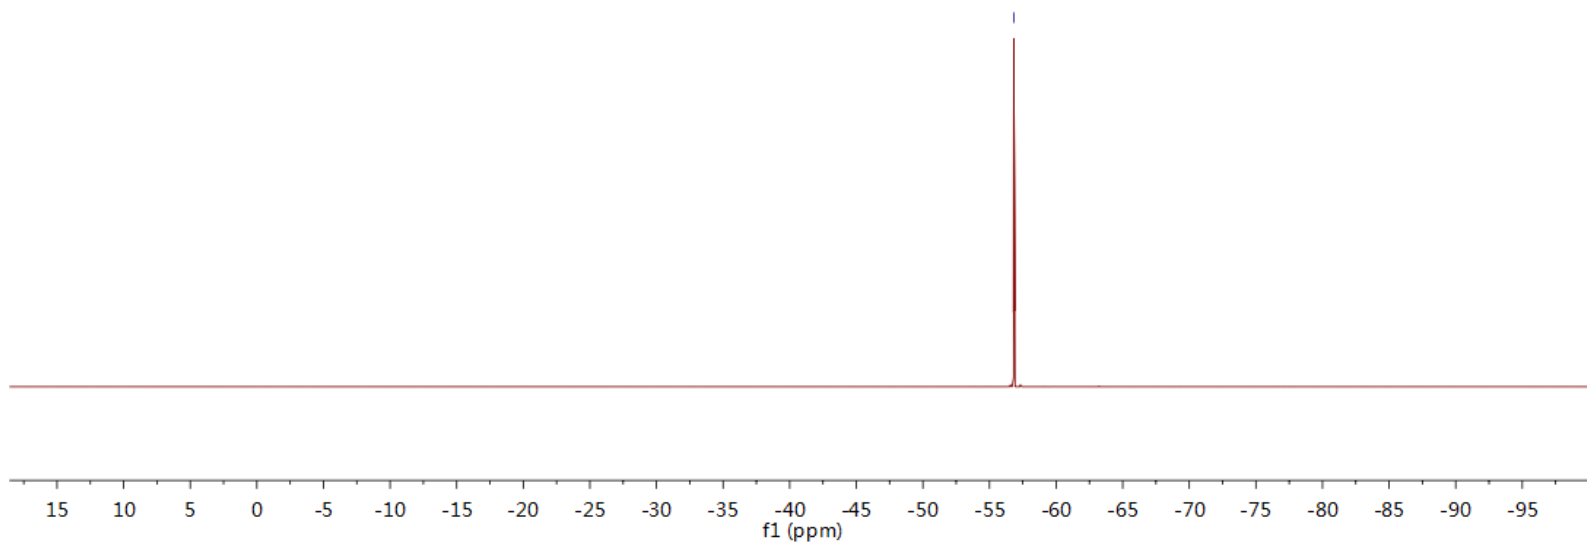

8.0705  
8.0496  
7.7400  
7.7195  
7.6475  
7.6272  
7.5217  
7.5008

<sup>1</sup>H NMR MC-9-83 in CDCl<sub>3</sub>

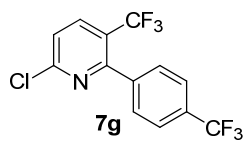

<sup>1</sup>H NMR (400 MHz, CDCl<sub>3</sub>)

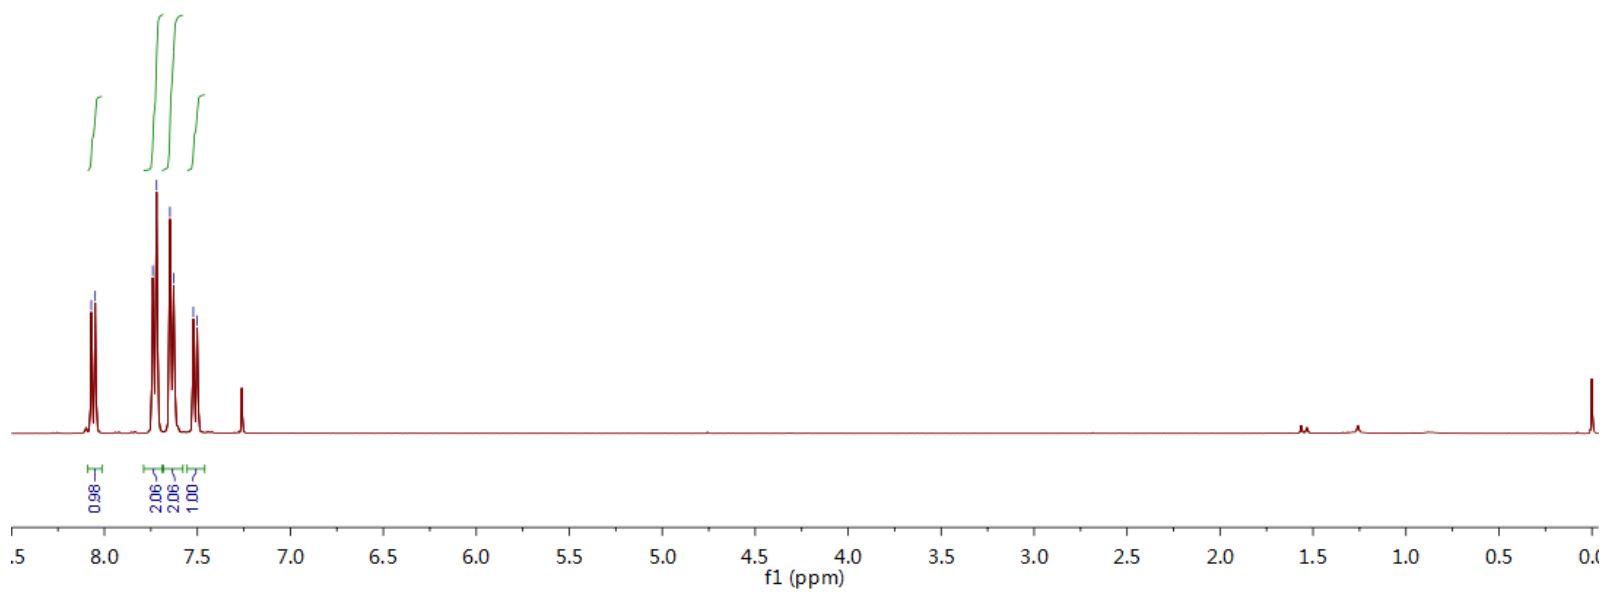

157.80  
 154.03  
 141.25  
 137.85  
 137.81  
 137.76  
 137.71  
 131.79  
 131.46  
 129.41  
 129.39  
 129.37  
 128.35  
 128.13  
 127.36  
 125.38  
 125.34  
 125.30  
 125.27  
 124.65  
 123.90  
 123.51  
 122.72  
 121.93  
 127.98  
 126.42  
 125.36  
 125.34  
 125.30  
 125.27  
 124.65  
 124.32  
 123.90  
 123.66  
 123.51  
 122.72  
 121.93

<sup>13</sup>C NMR MC-9-83 in CDCl<sub>3</sub>

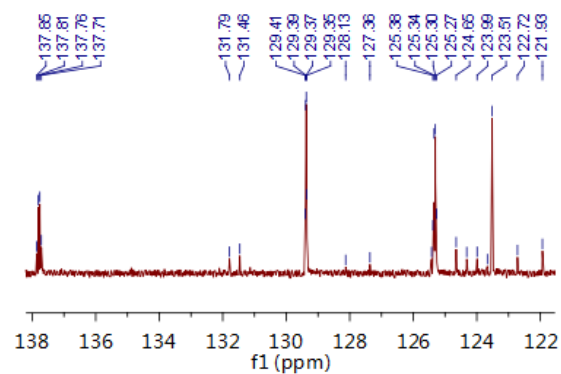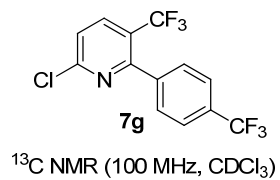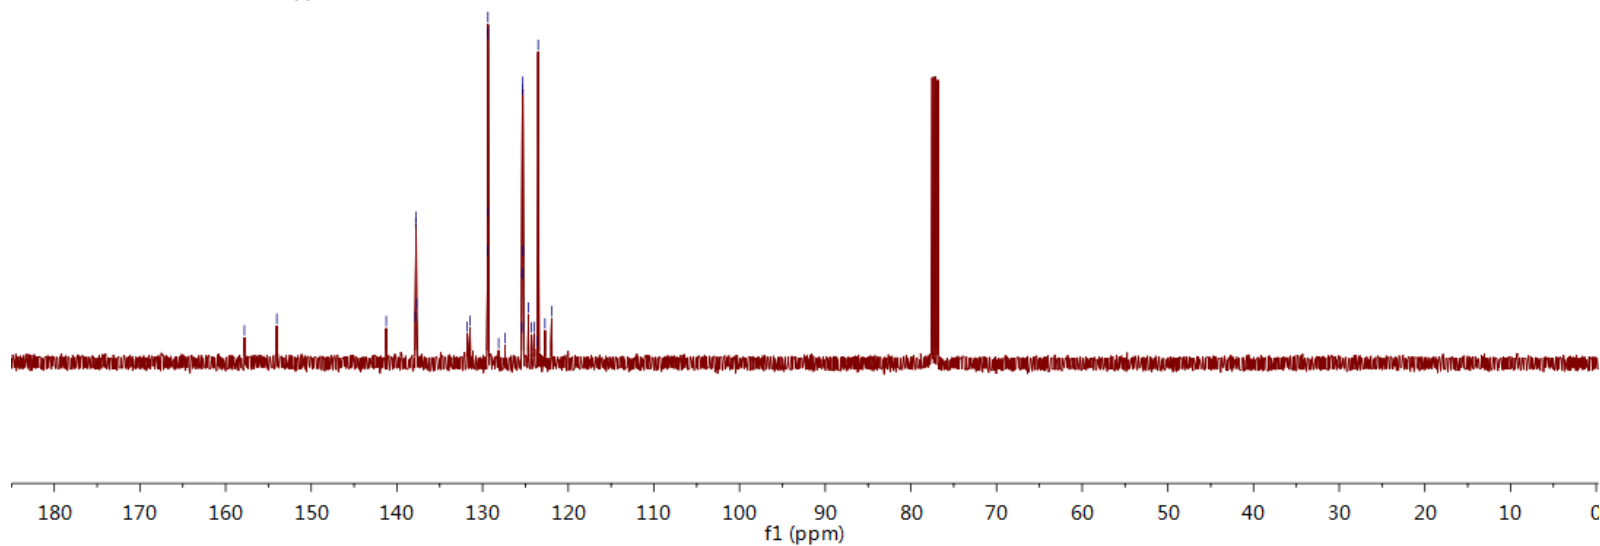

$^{19}\text{F}$  NMR MC-9-83 in  $\text{CDCl}_3$

-57.0291

-62.8558

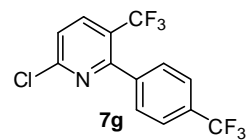

$^{19}\text{F}$  NMR (376 MHz,  $\text{CDCl}_3$ )

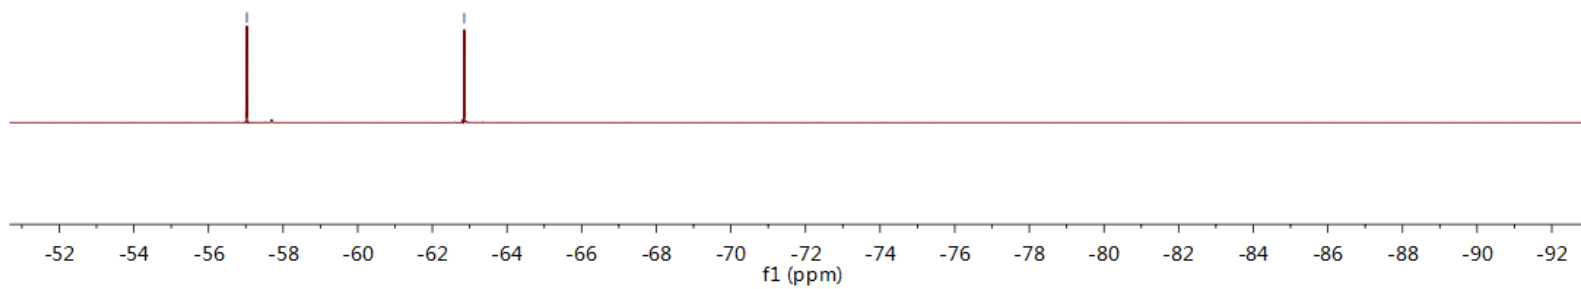

8.0641  
8.0432  
7.5262  
7.5053  
7.0720  
7.0574  
6.9654  
6.9598  
6.9433  
6.9377  
6.9321  
6.9212  
6.9156

<sup>1</sup>H NMR MC-9-34B in CDCl<sub>3</sub>

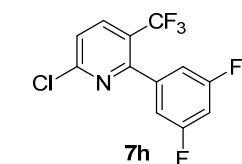

<sup>1</sup>H NMR (400 MHz, CDCl<sub>3</sub>)

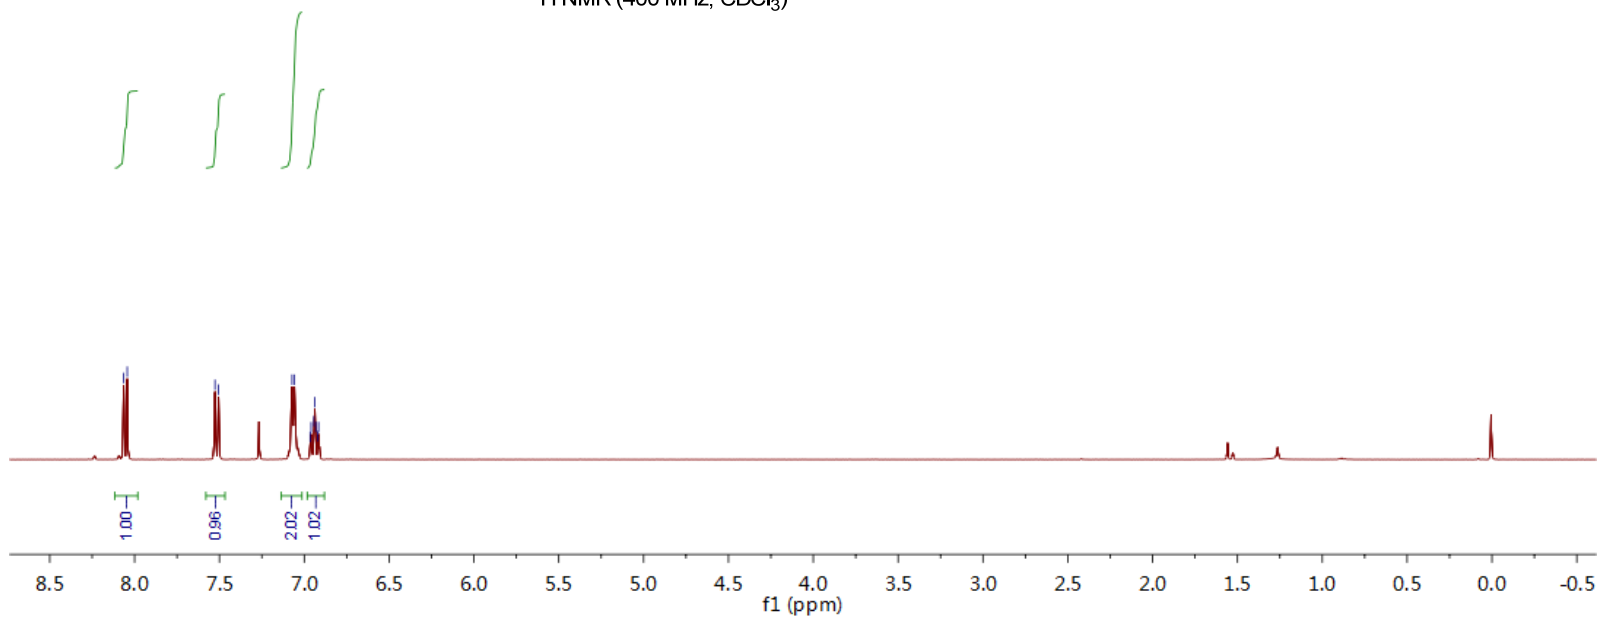



163.82  
163.69  
161.34  
161.21  
156.48  
153.88  
140.39  
137.73  
137.68  
137.63  
137.59  
124.38  
124.09  
123.76  
123.57  
112.37  
105.18  
104.93  
104.68

<sup>13</sup>C NMR MC-9-34B in CDCl<sub>3</sub>

124.38  
124.09  
123.76  
123.57  
123.44

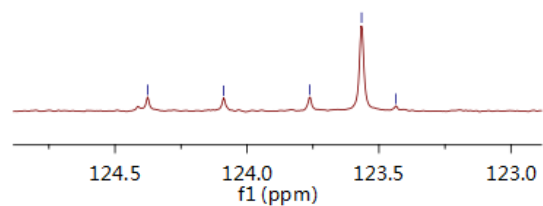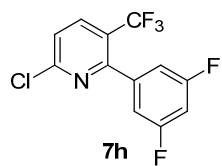

<sup>13</sup>C NMR (100 MHz, CDCl<sub>3</sub>)

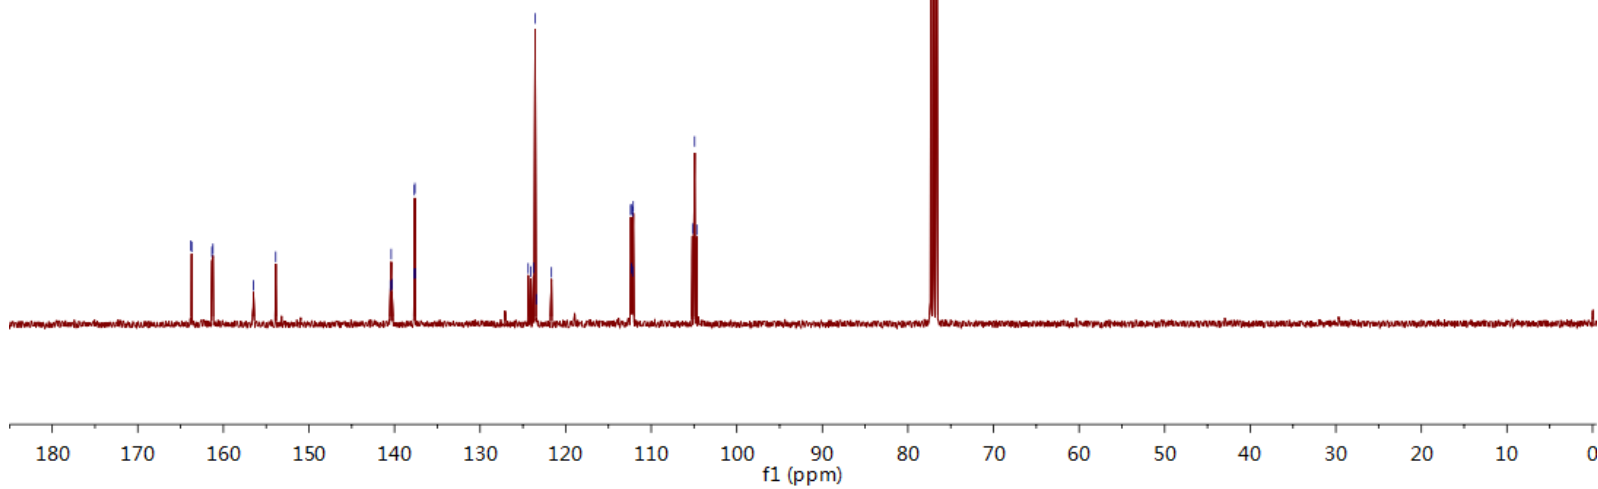

<sup>19</sup>F NMR MC-9-34B in CDCl<sub>3</sub>

---57.1891

---109.1754

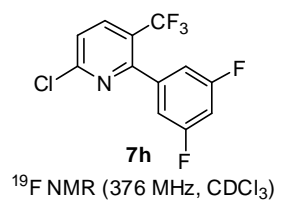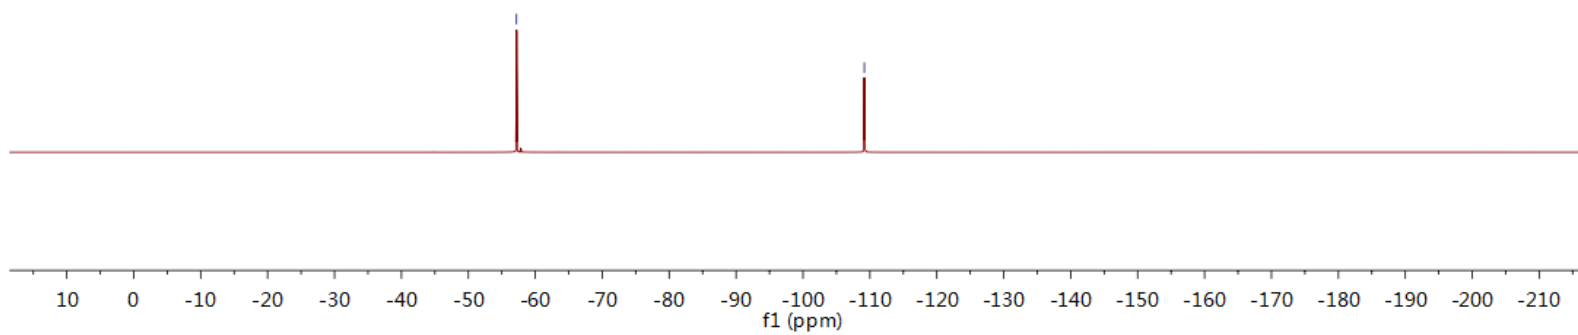

7.9343  
7.9139  
7.4834  
7.4744  
7.4690  
7.4402  
7.4331  
7.4310  
7.4269  
7.4227  
7.4162  
7.2440  
7.2240

2.6536

<sup>1</sup>H NMR MC-9-36A in CDCl<sub>3</sub>

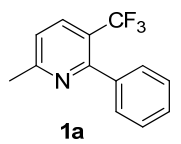

<sup>1</sup>H NMR (400 MHz, CDCl<sub>3</sub>)

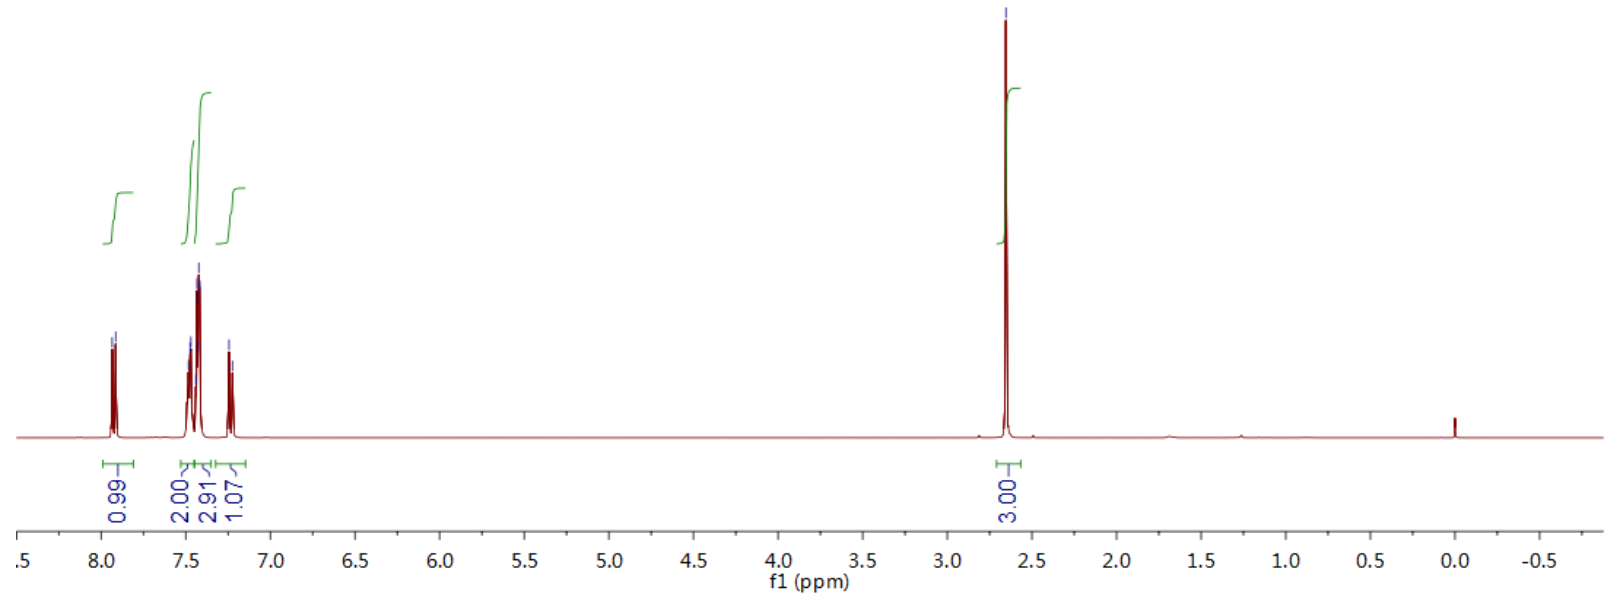

161.41  
157.95  
157.93  
139.49  
134.96  
134.91  
134.86  
134.81  
128.64  
127.97  
125.33  
122.62  
122.31  
121.99  
121.67  
121.30  
119.90

<sup>13</sup>C NMR MC-9-36A in CDCl<sub>3</sub>

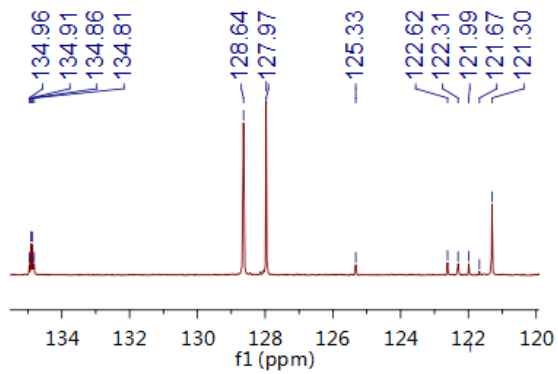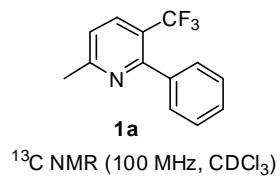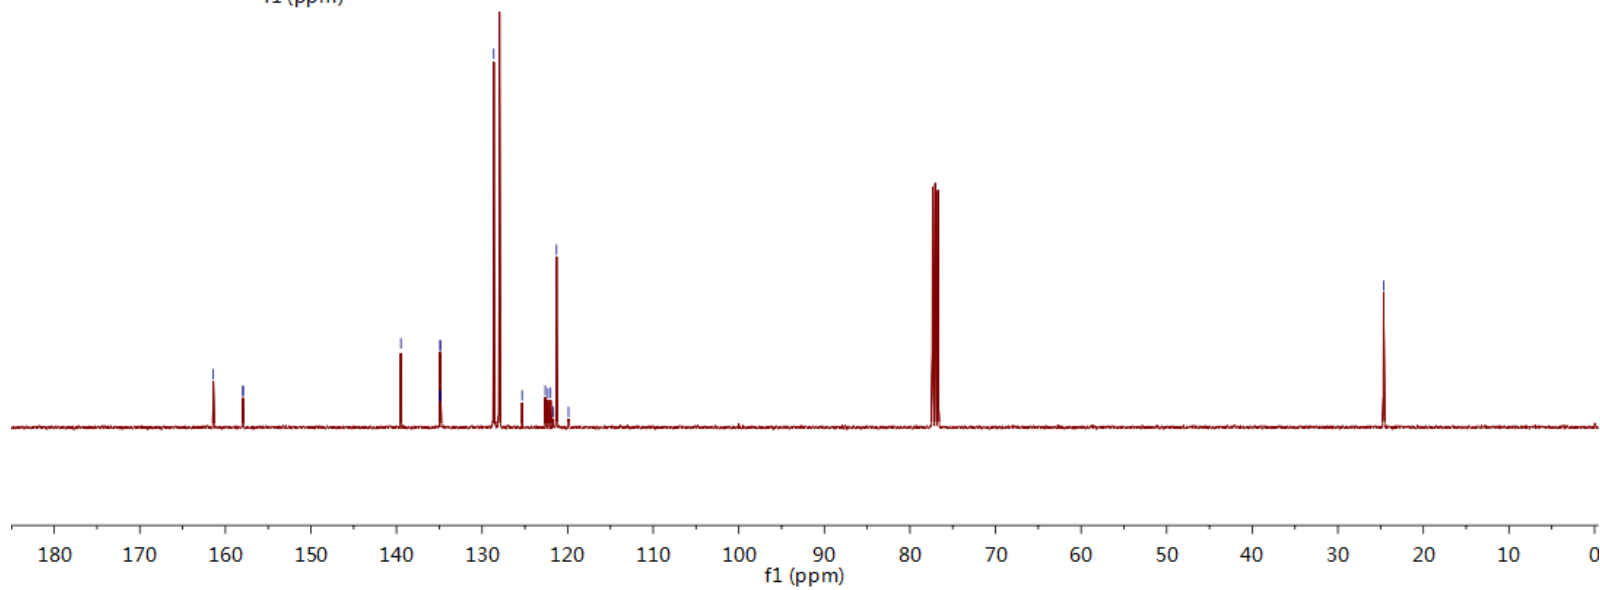

—24.65

<sup>19</sup>F NMR MC-9-36A in CDCl<sub>3</sub>

-57.0290

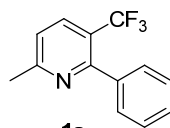

<sup>19</sup>F NMR (376 MHz, CDCl<sub>3</sub>)

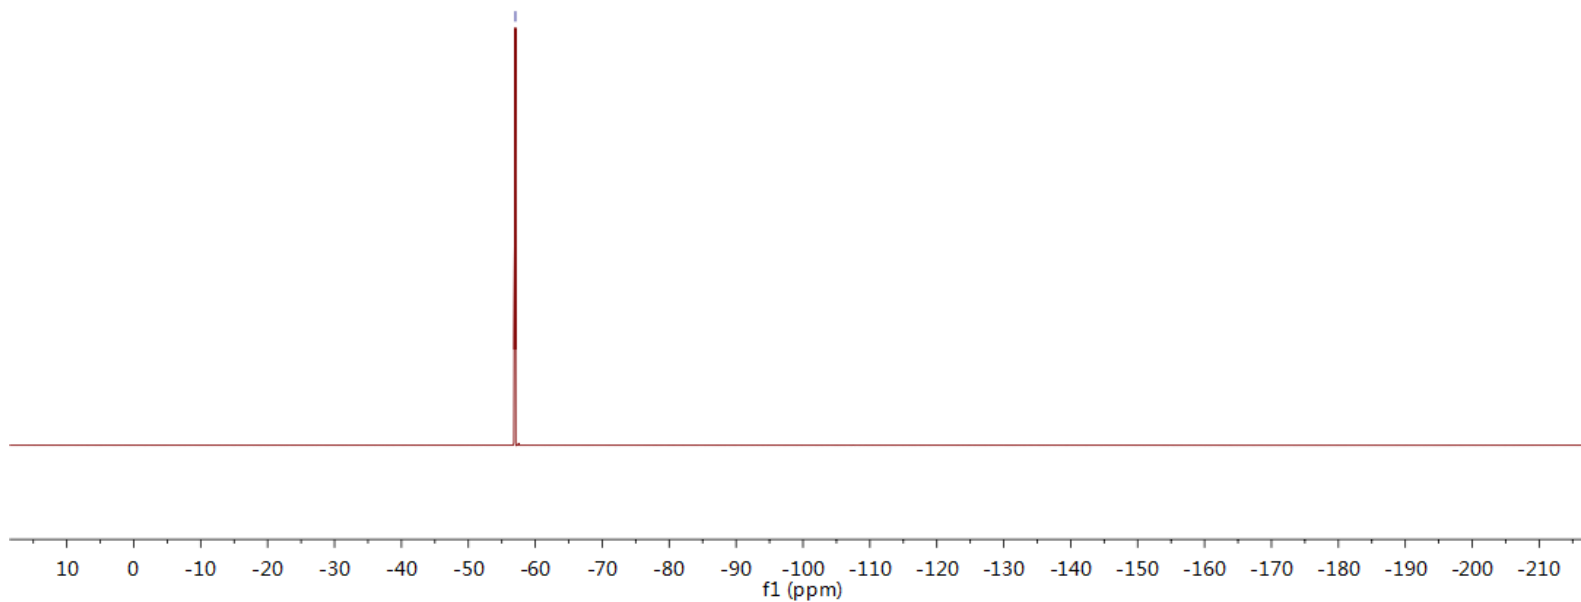

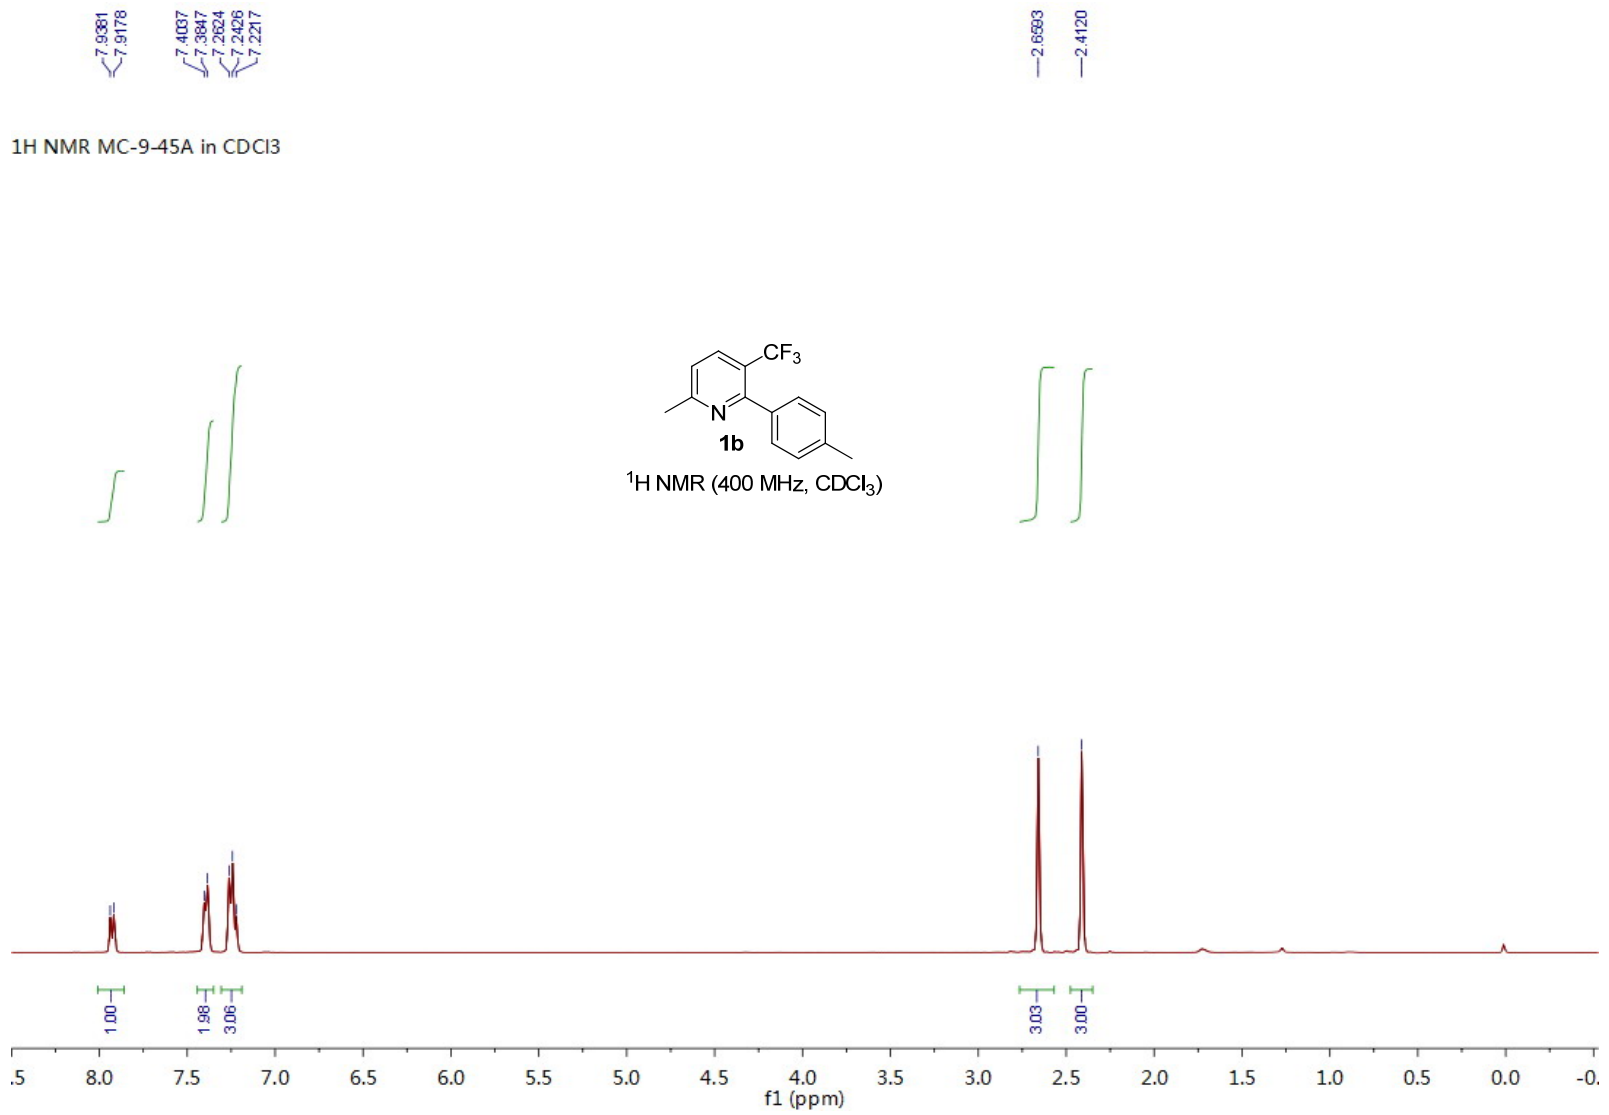

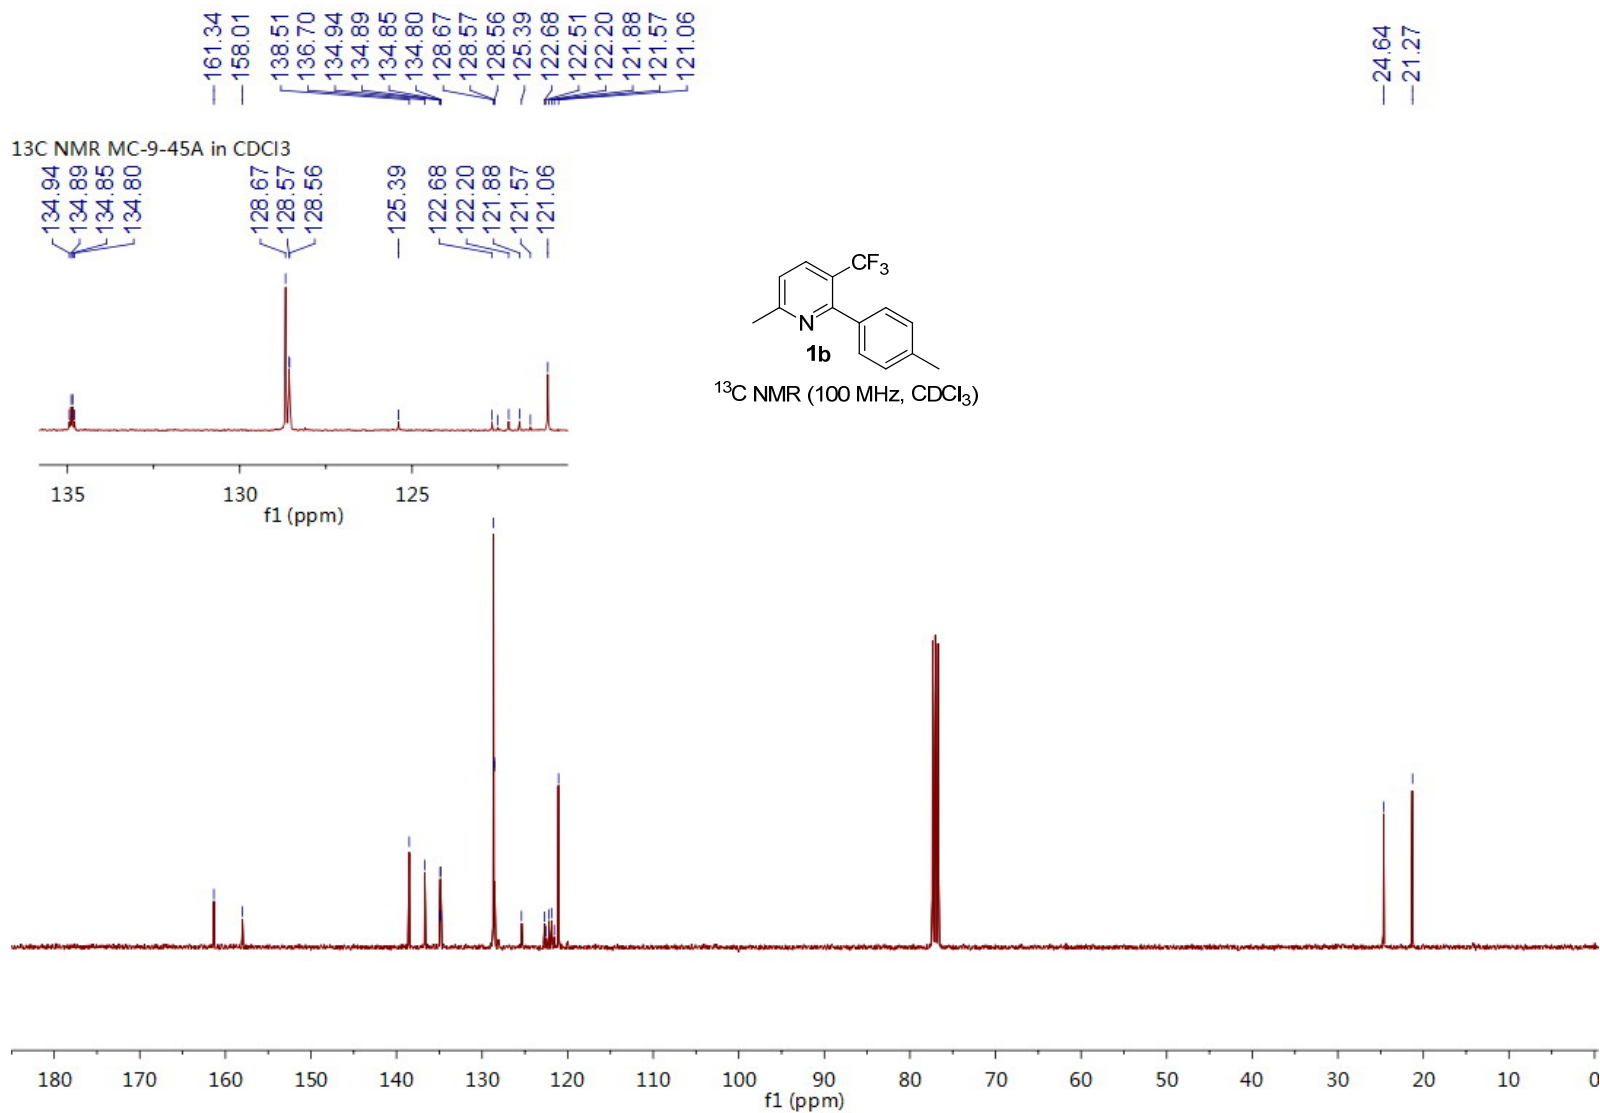

19F NMR MC-9-45A in CDCl3

--57.0317

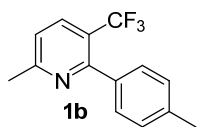

<sup>19</sup>F NMR (376 MHz, CDCl<sub>3</sub>)

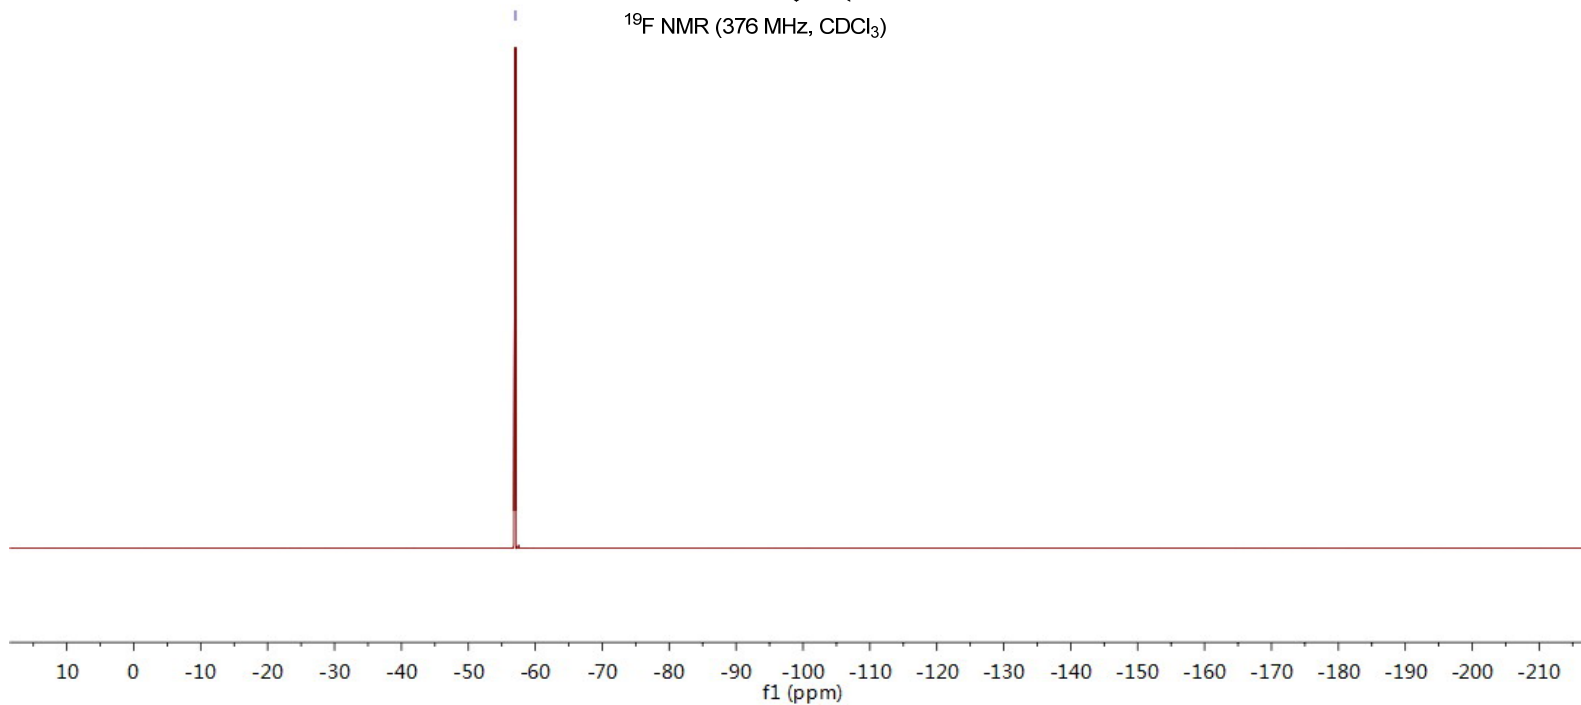



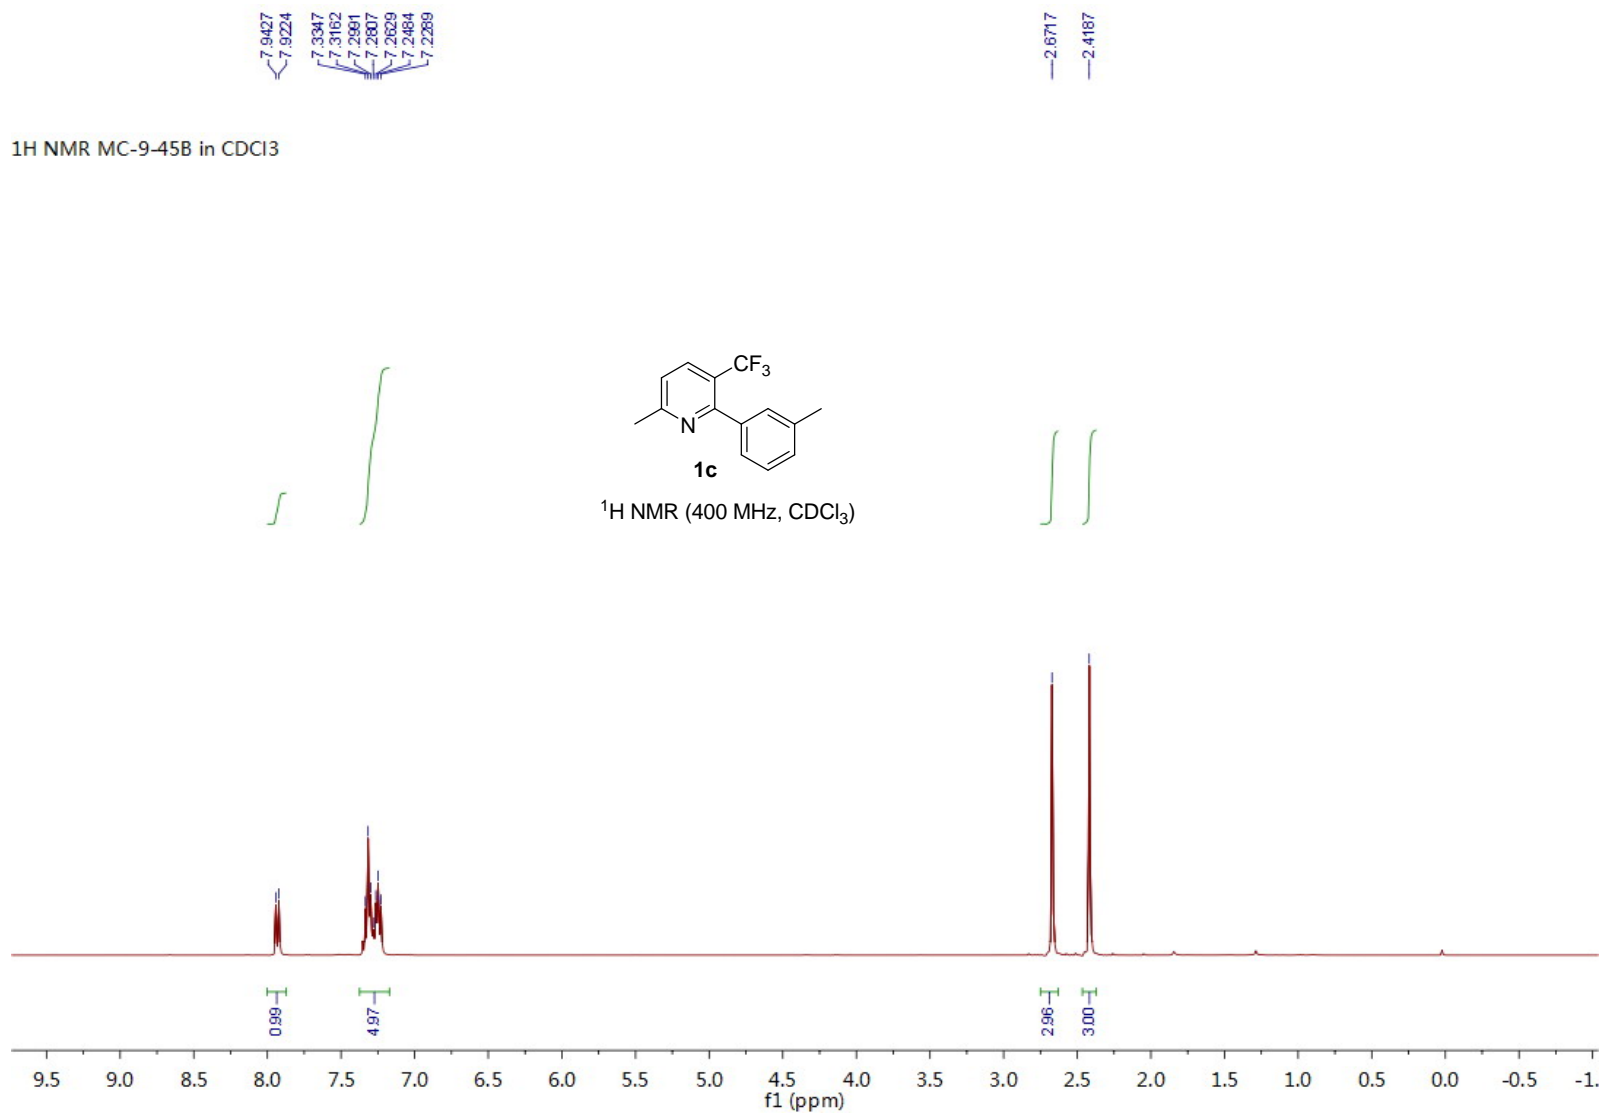

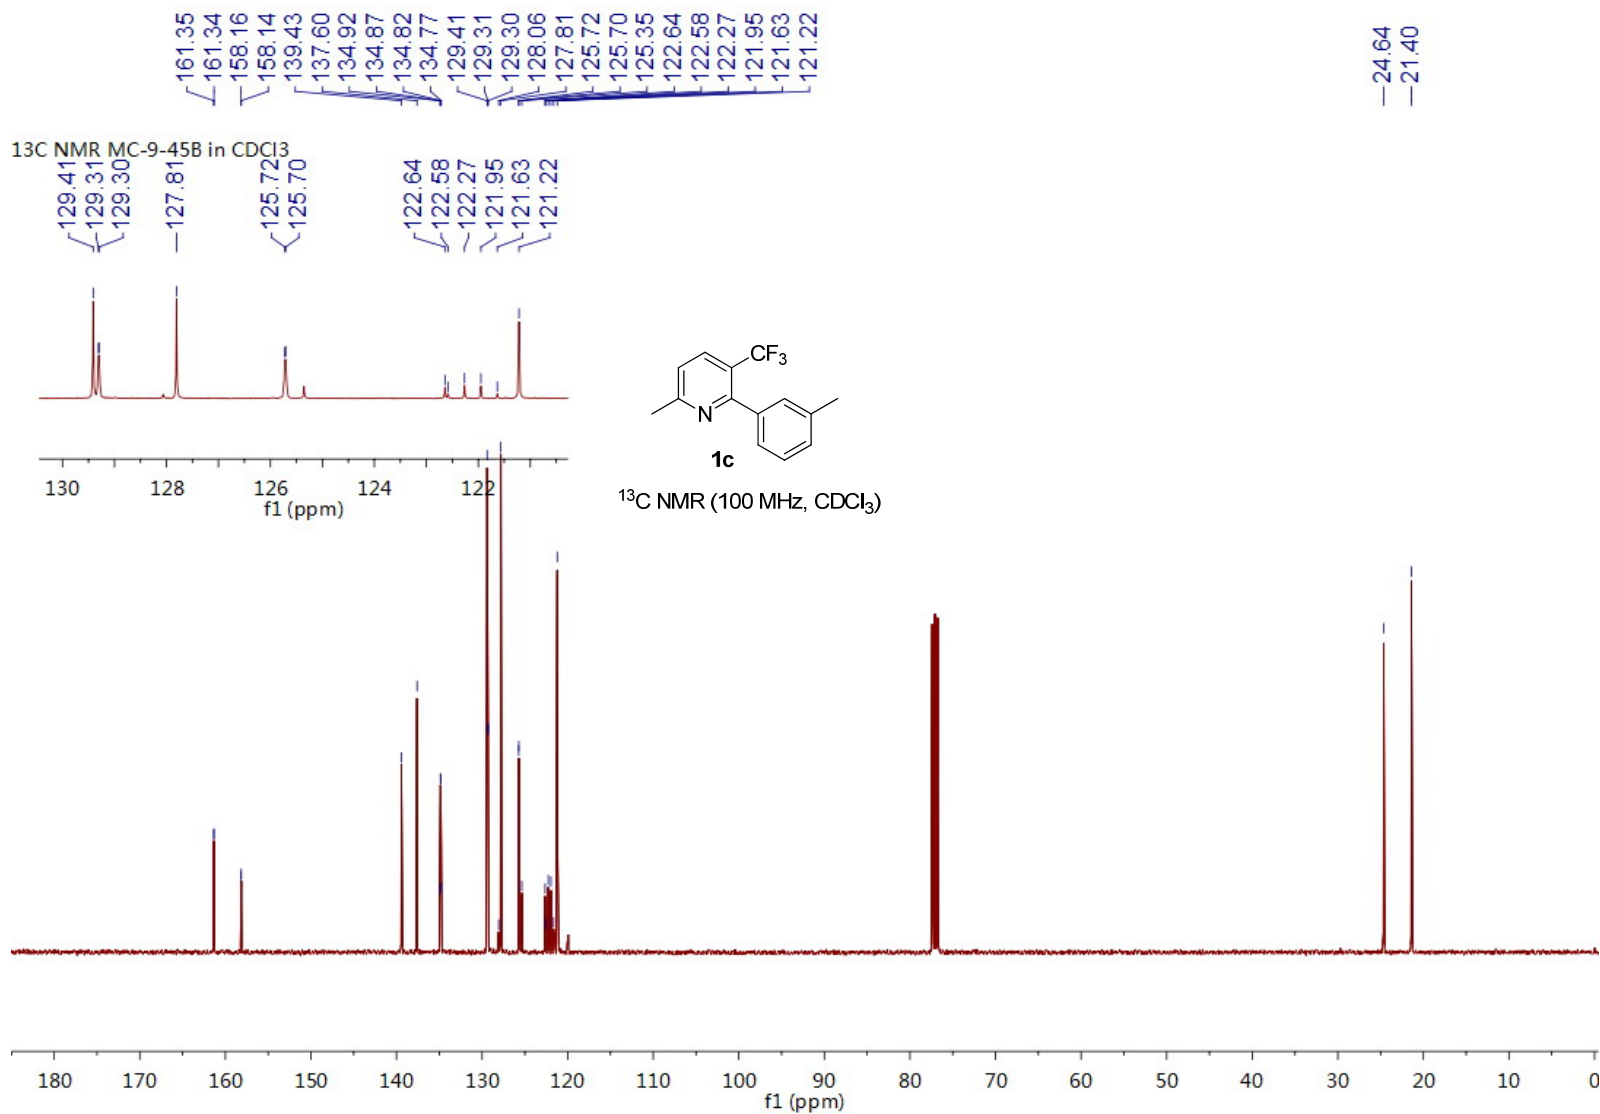

<sup>19</sup>F NMR MC-9-45B in CDCl<sub>3</sub>

-57.0472

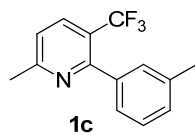

<sup>19</sup>F NMR (376 MHz, CDCl<sub>3</sub>)

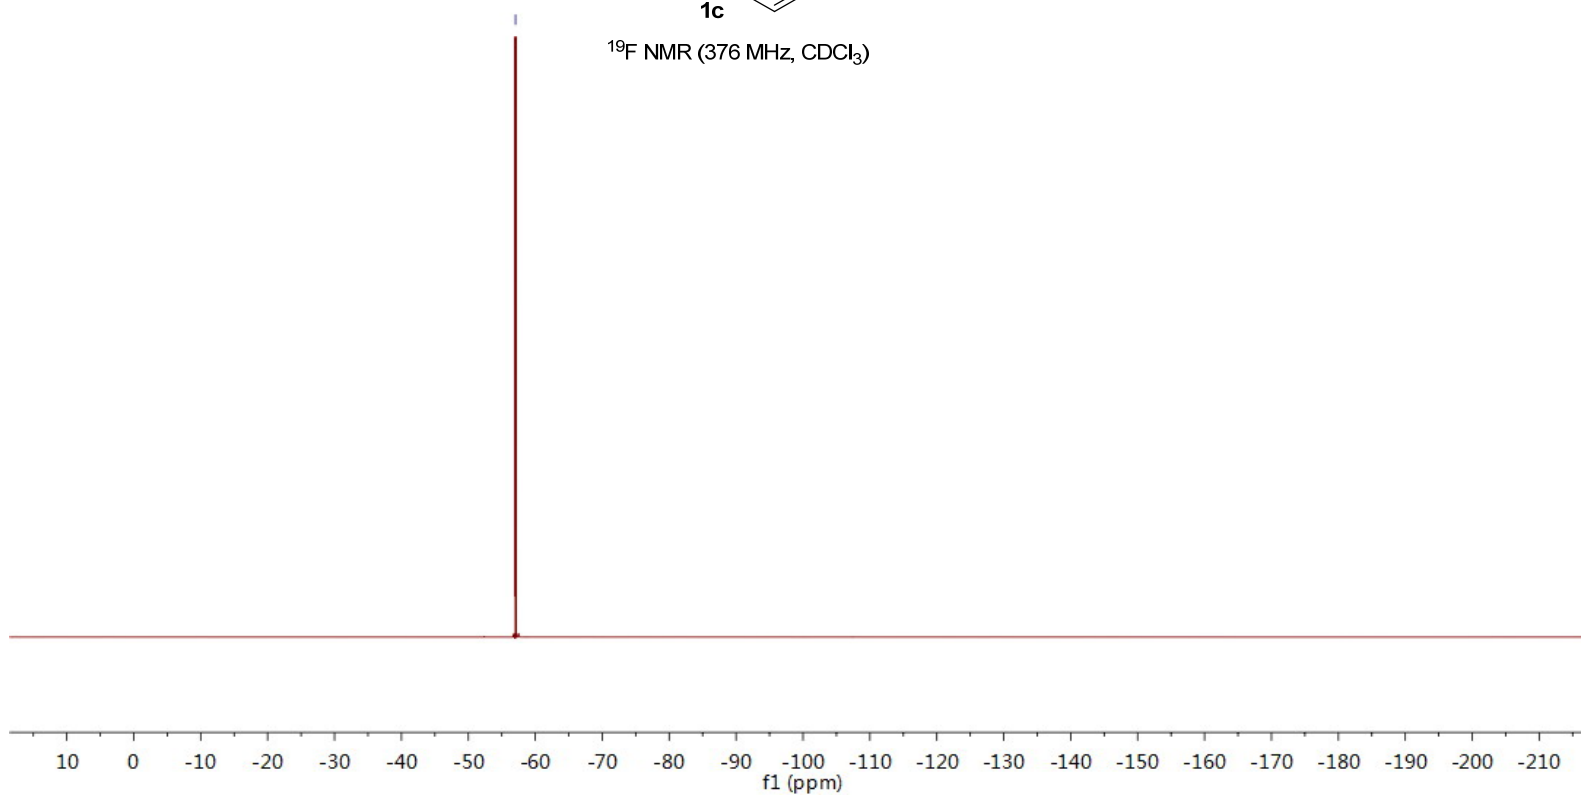

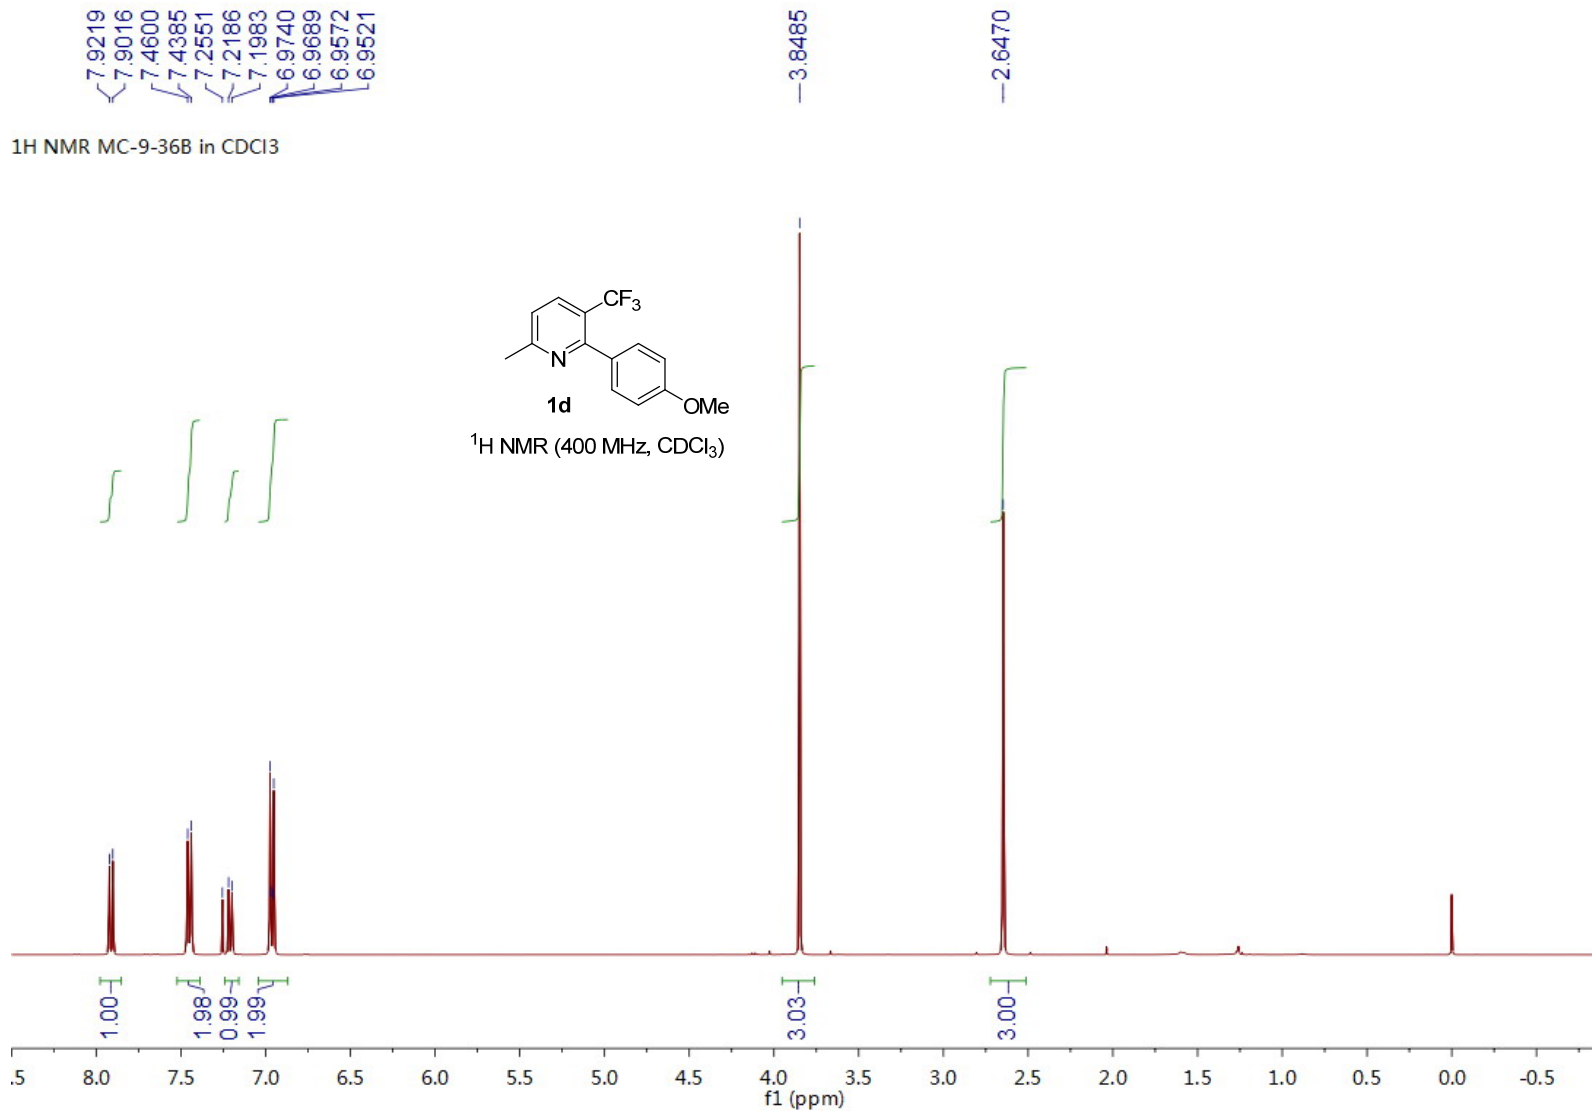

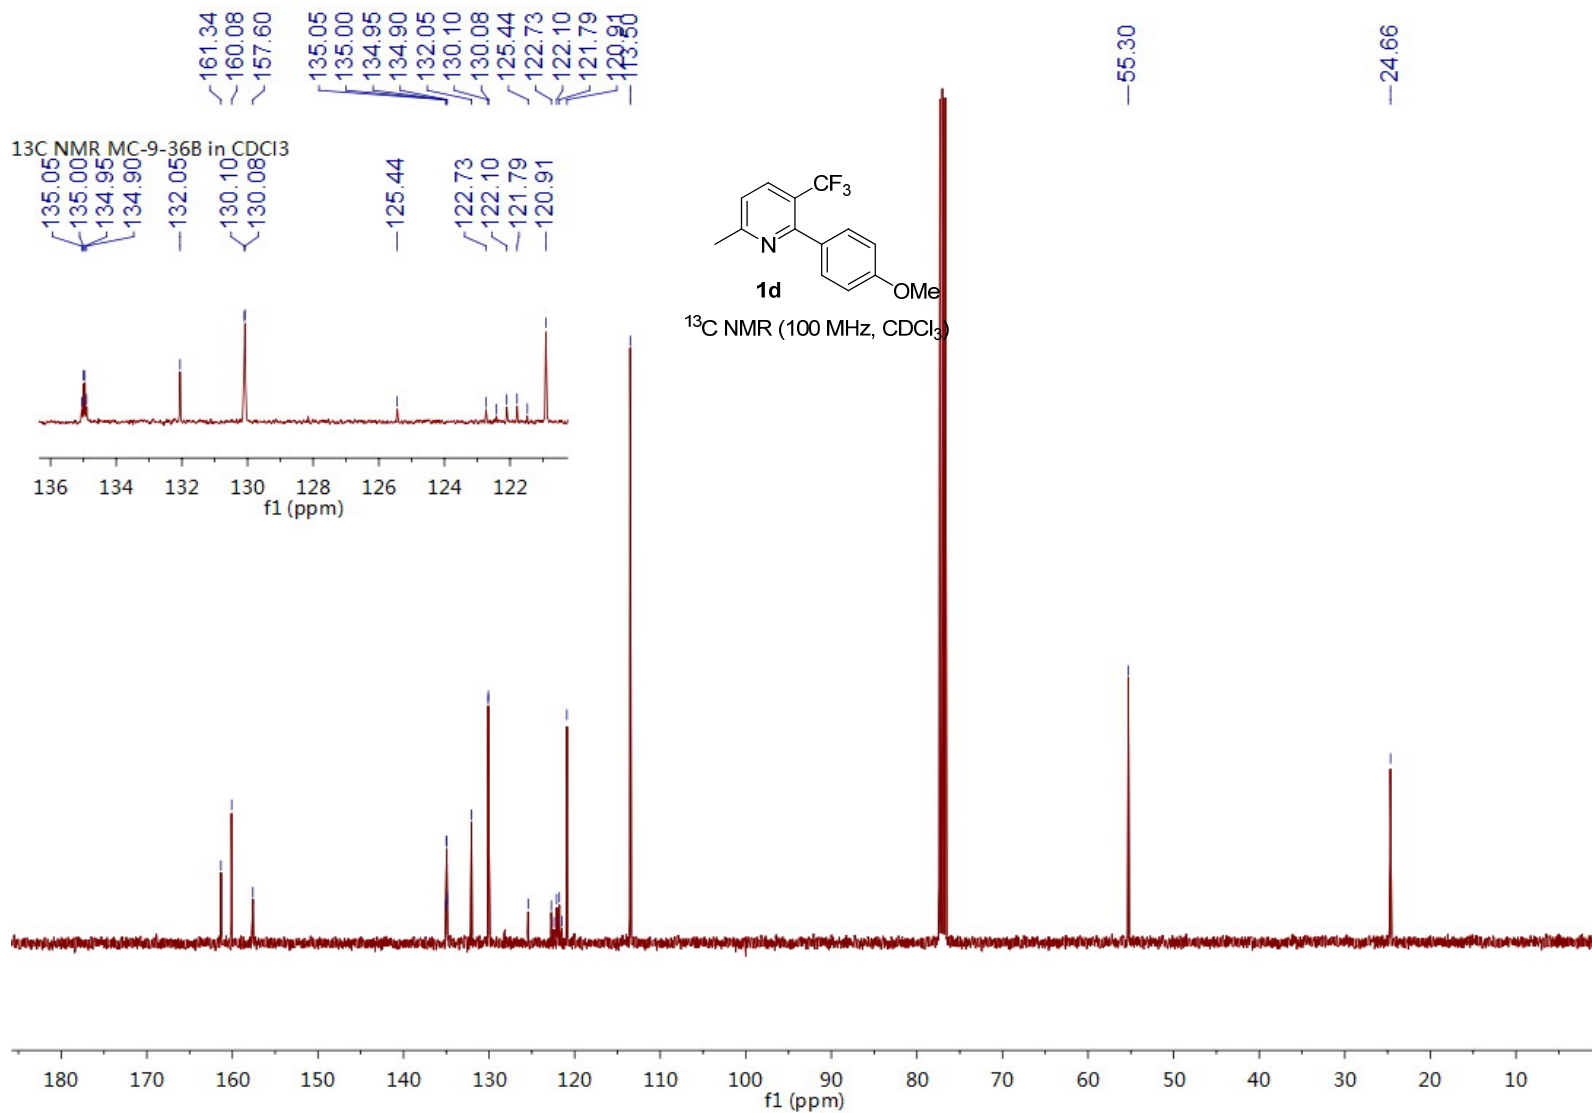

<sup>19</sup>F NMR MC-9-36B in CDCl<sub>3</sub>

--57.0355

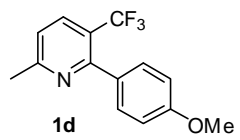

<sup>19</sup>F NMR (376 MHz, CDCl<sub>3</sub>)

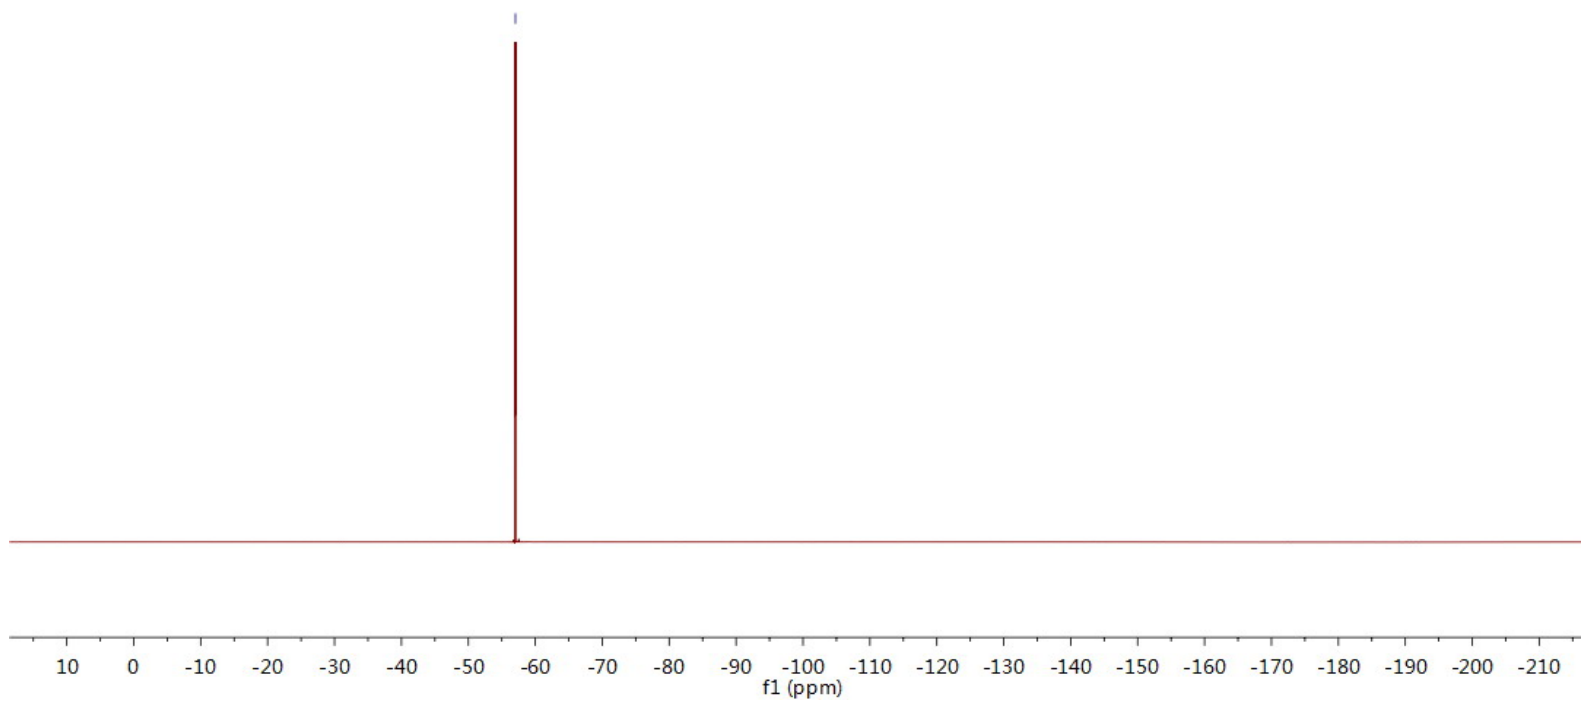

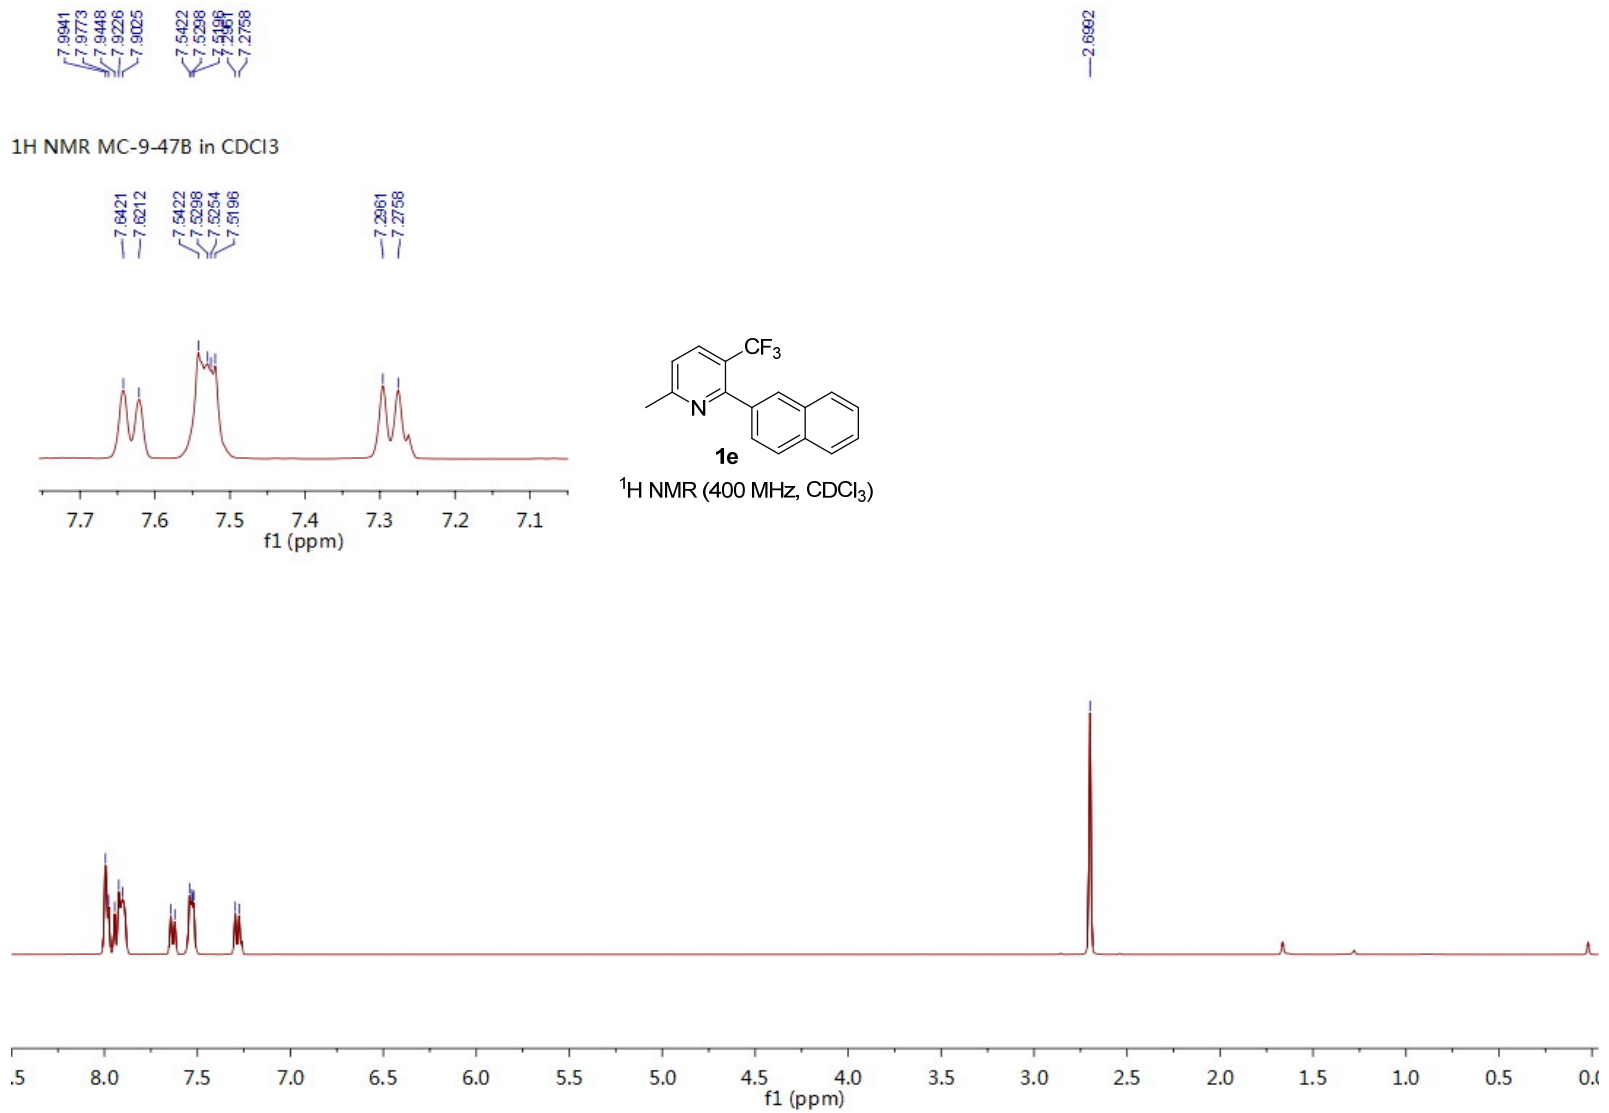

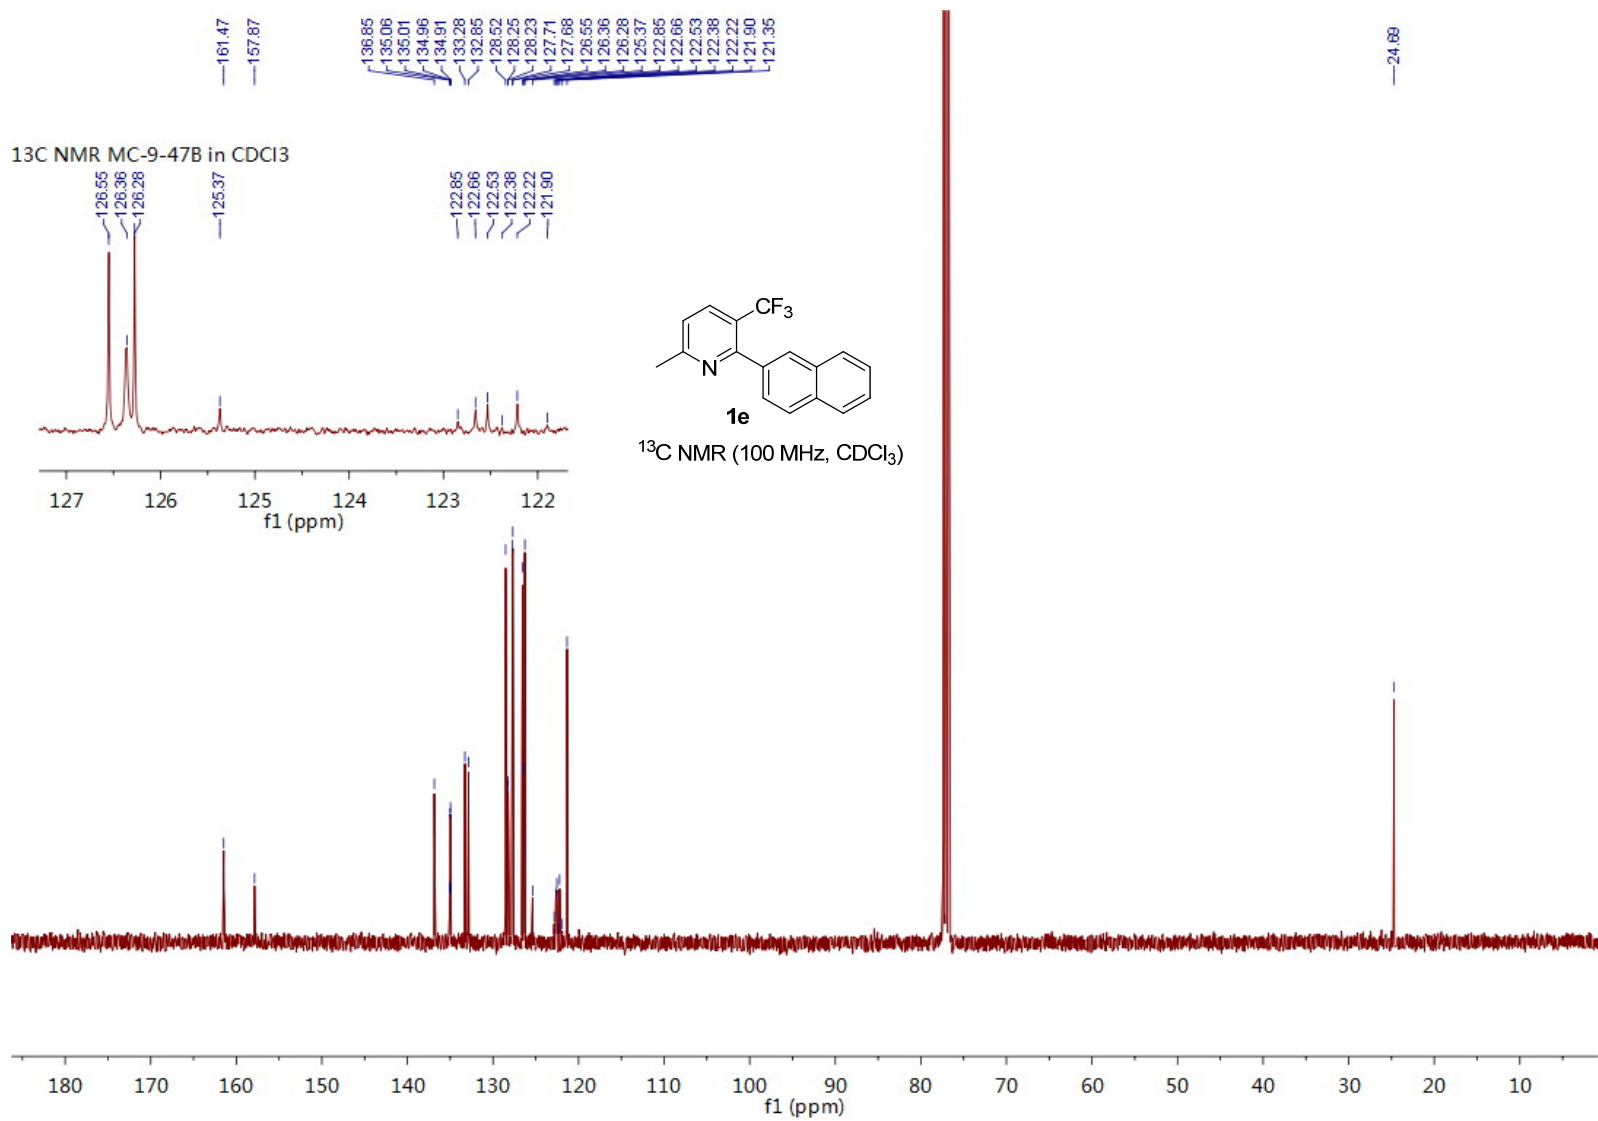



19F NMR MC-9-47B in CDCl3

—56.9329

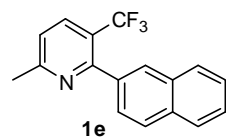

<sup>19</sup>F NMR (376 MHz, CDCl<sub>3</sub>)

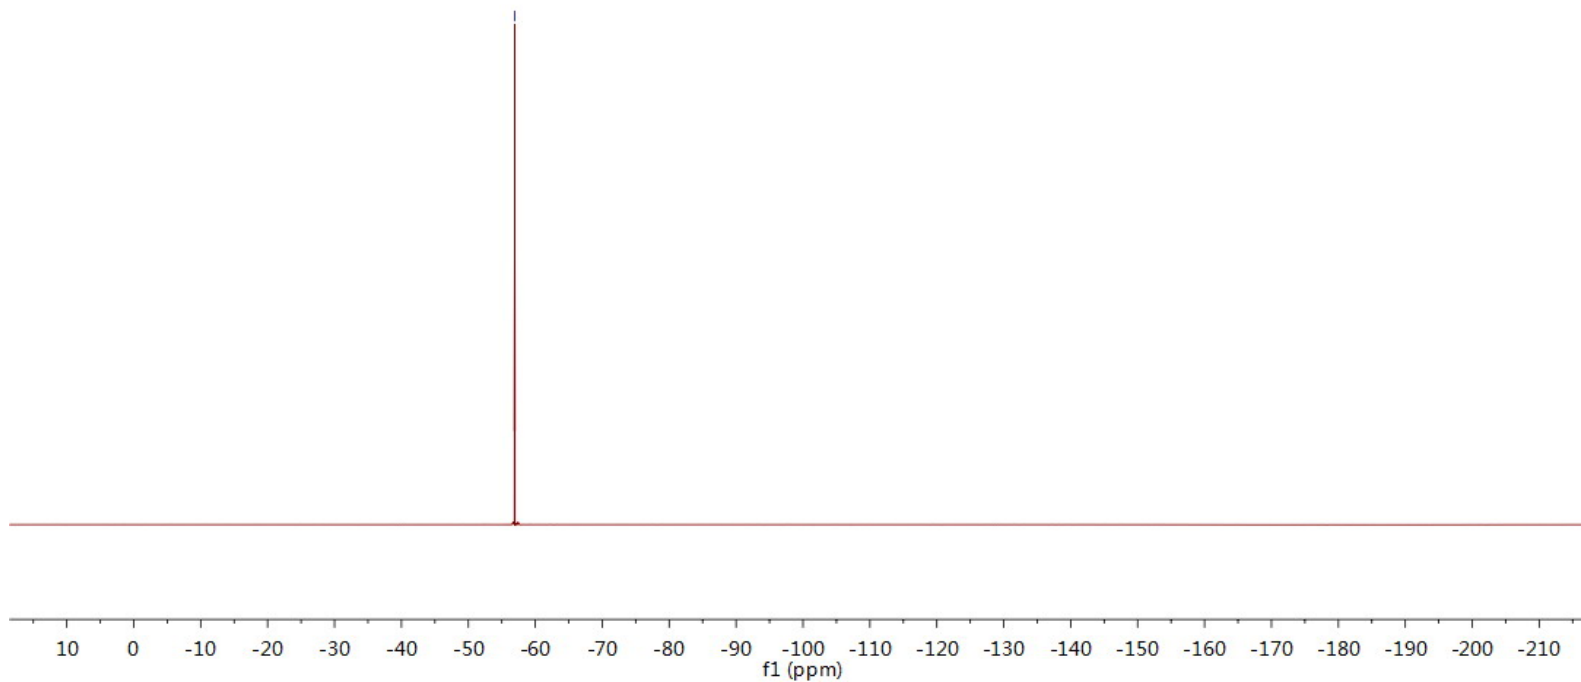

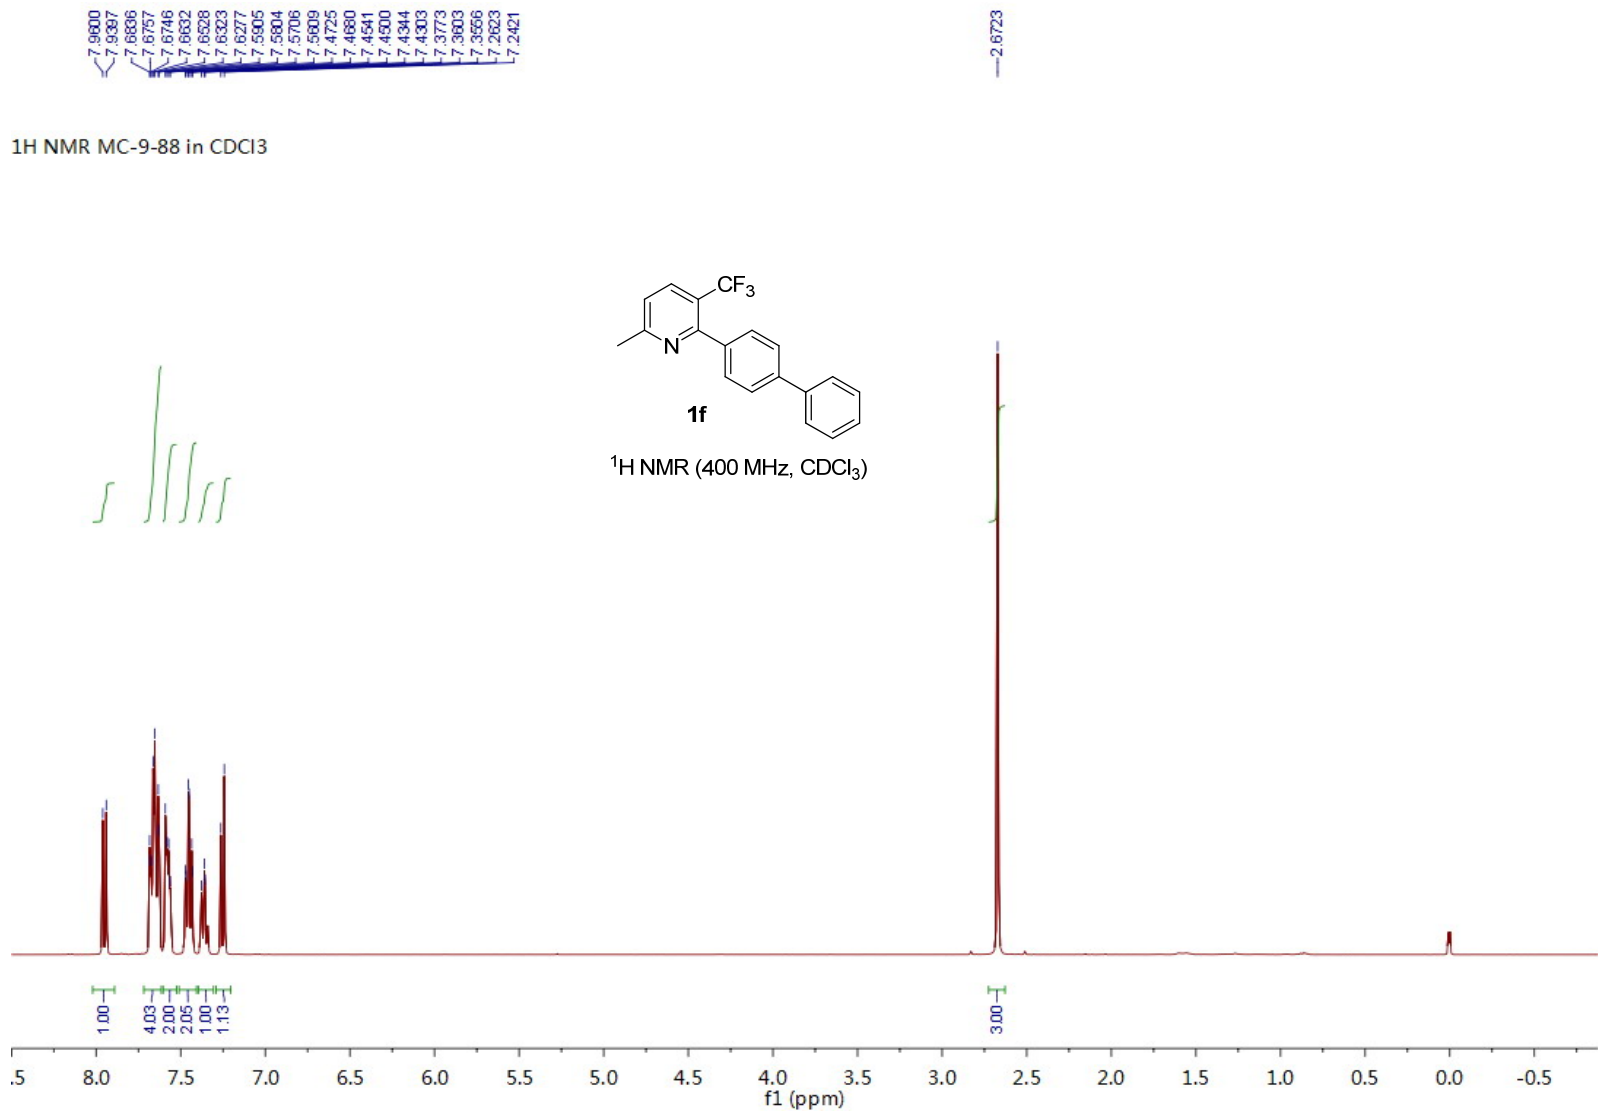

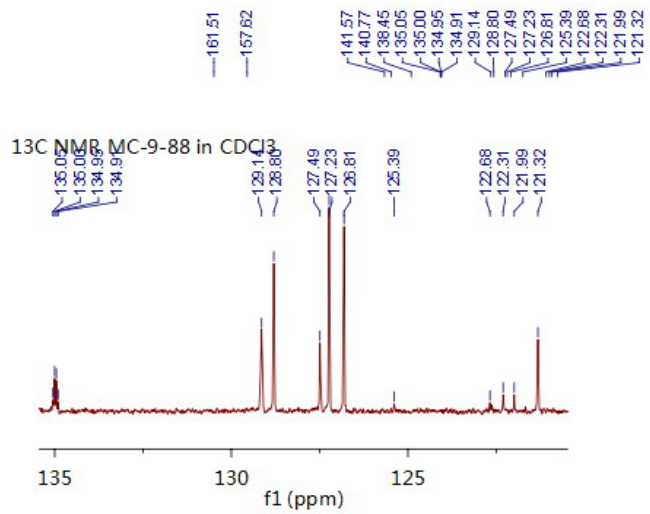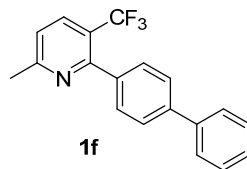

<sup>13</sup>C NMR (100 MHz, CDCl<sub>3</sub>)

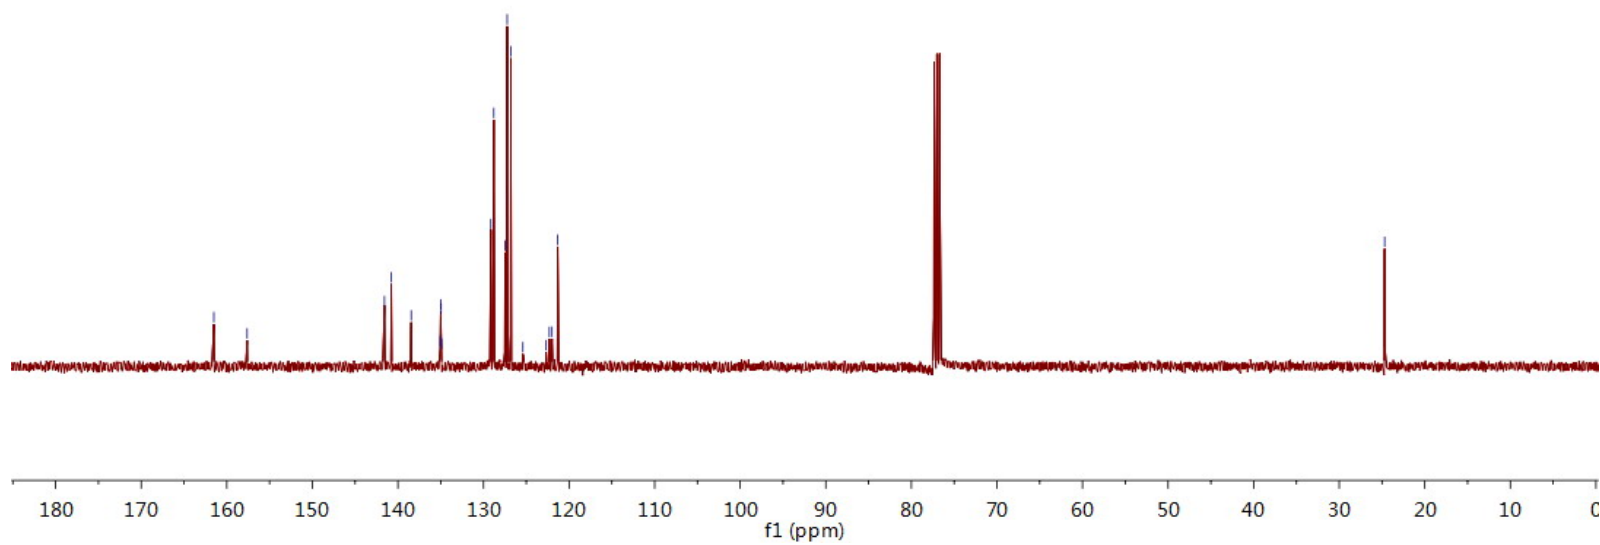

<sup>19</sup>F NMR MC-9-88 in CDCl<sub>3</sub>

—56.8919

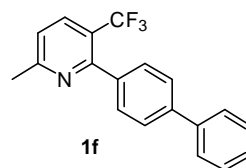

<sup>19</sup>F NMR (376 MHz, CDCl<sub>3</sub>)

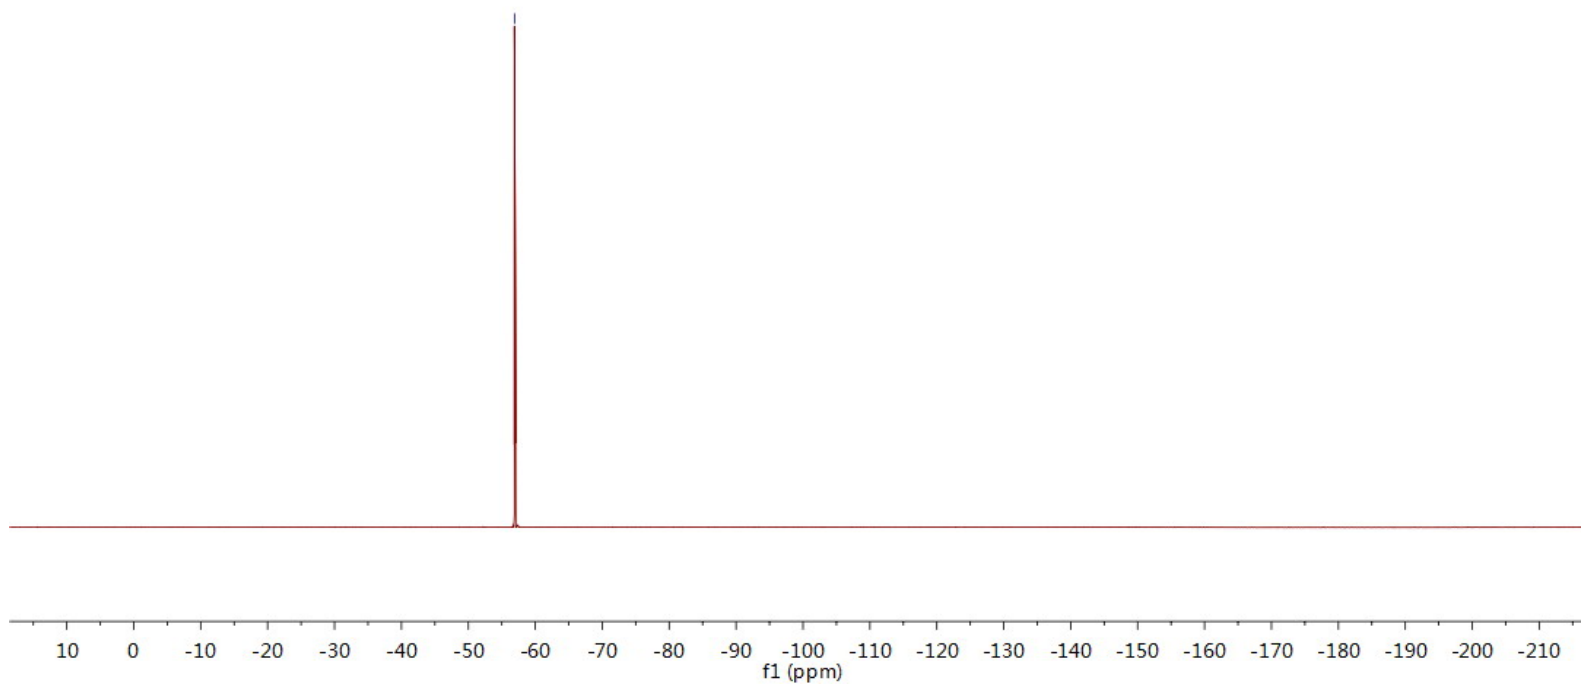

7.9783  
7.9589  
7.7173  
7.6970  
7.6163  
7.2979  
7.2565

2.6689

<sup>1</sup>H NMR MC-9-92 in CDCl<sub>3</sub>

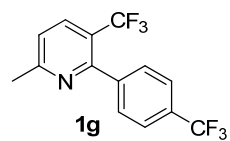

<sup>1</sup>H NMR (400 MHz, CDCl<sub>3</sub>)

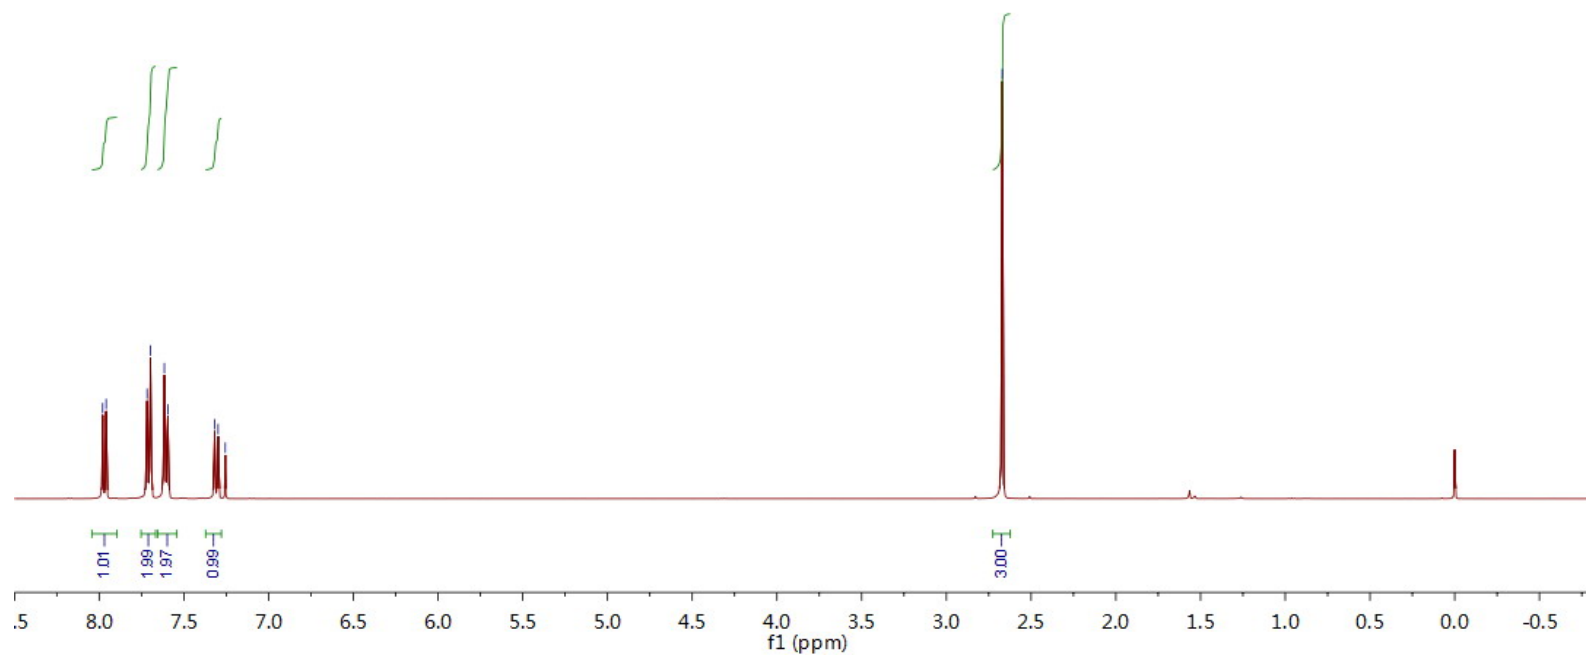

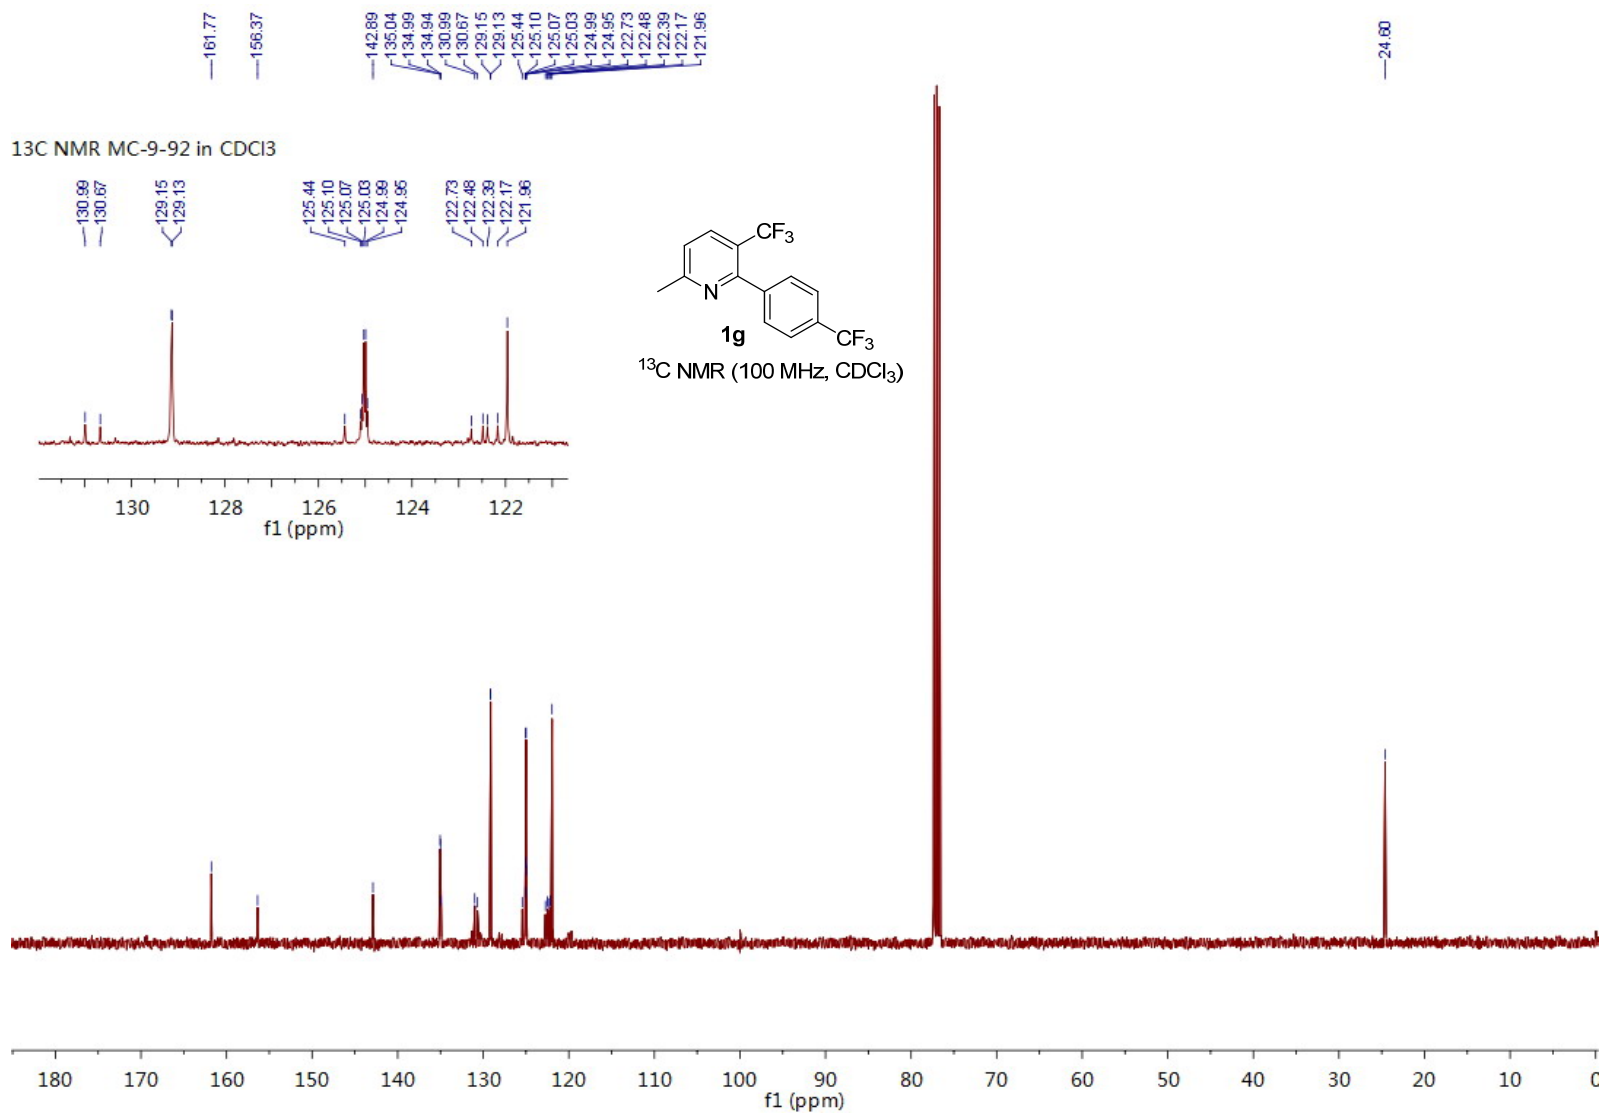

<sup>19</sup>F NMR MC-9-92 in CDCl<sub>3</sub>

—57.0345  
—62.7643

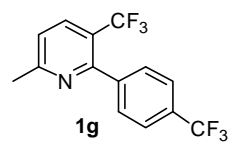

<sup>19</sup>F NMR (376 MHz, CDCl<sub>3</sub>)

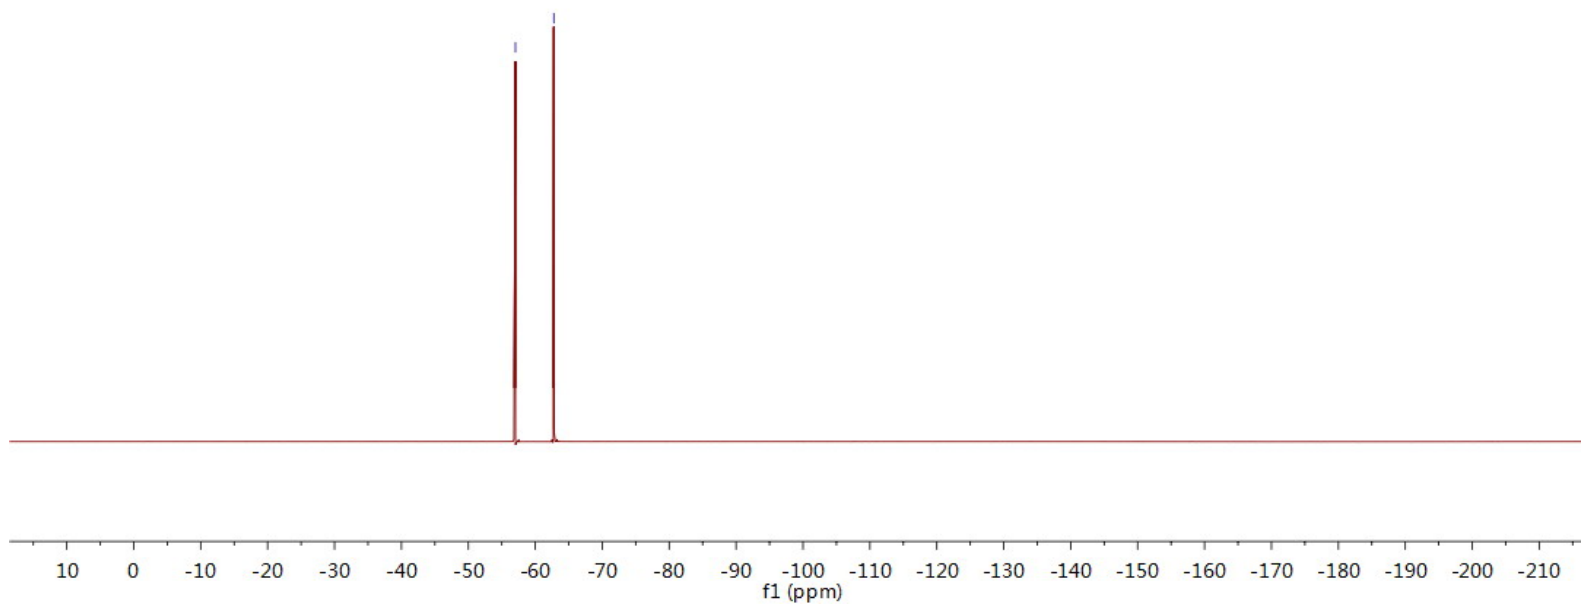

7.9669  
7.9465  
7.3176  
7.2972  
7.0417  
7.0370  
7.0222  
7.0176  
6.9150  
6.9092  
6.9034  
6.8927  
6.8869  
6.8811  
6.8704  
6.8646  
6.8587

2.6669

<sup>1</sup>H NMR MC-9-47A in CDCl<sub>3</sub>

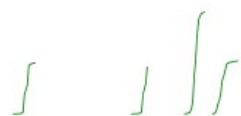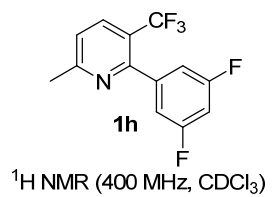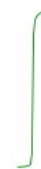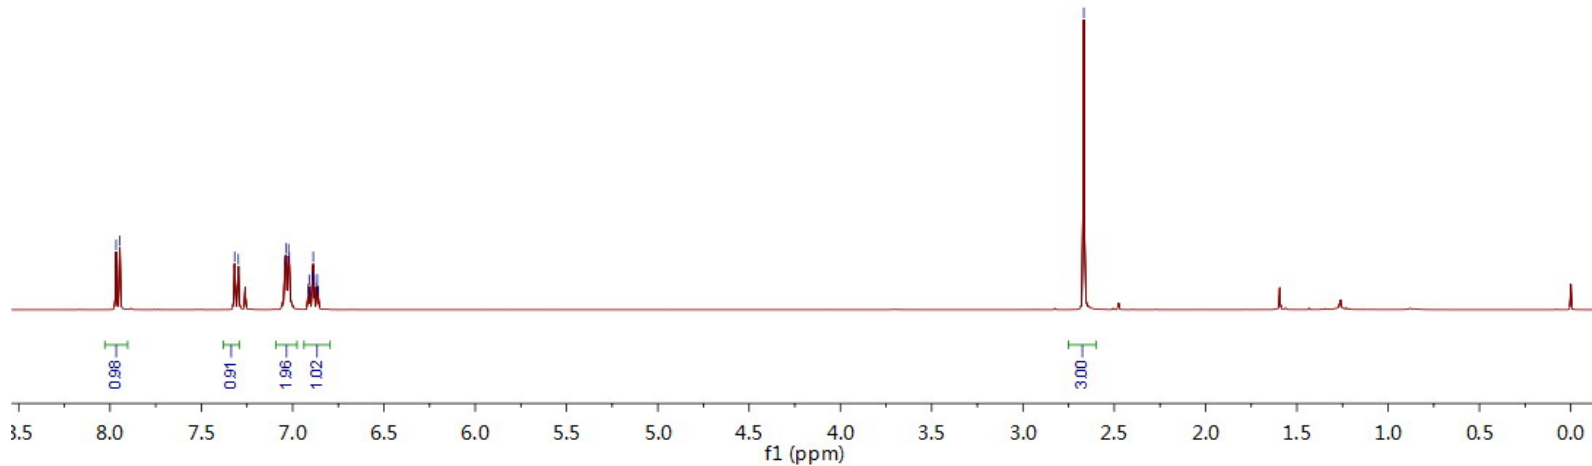



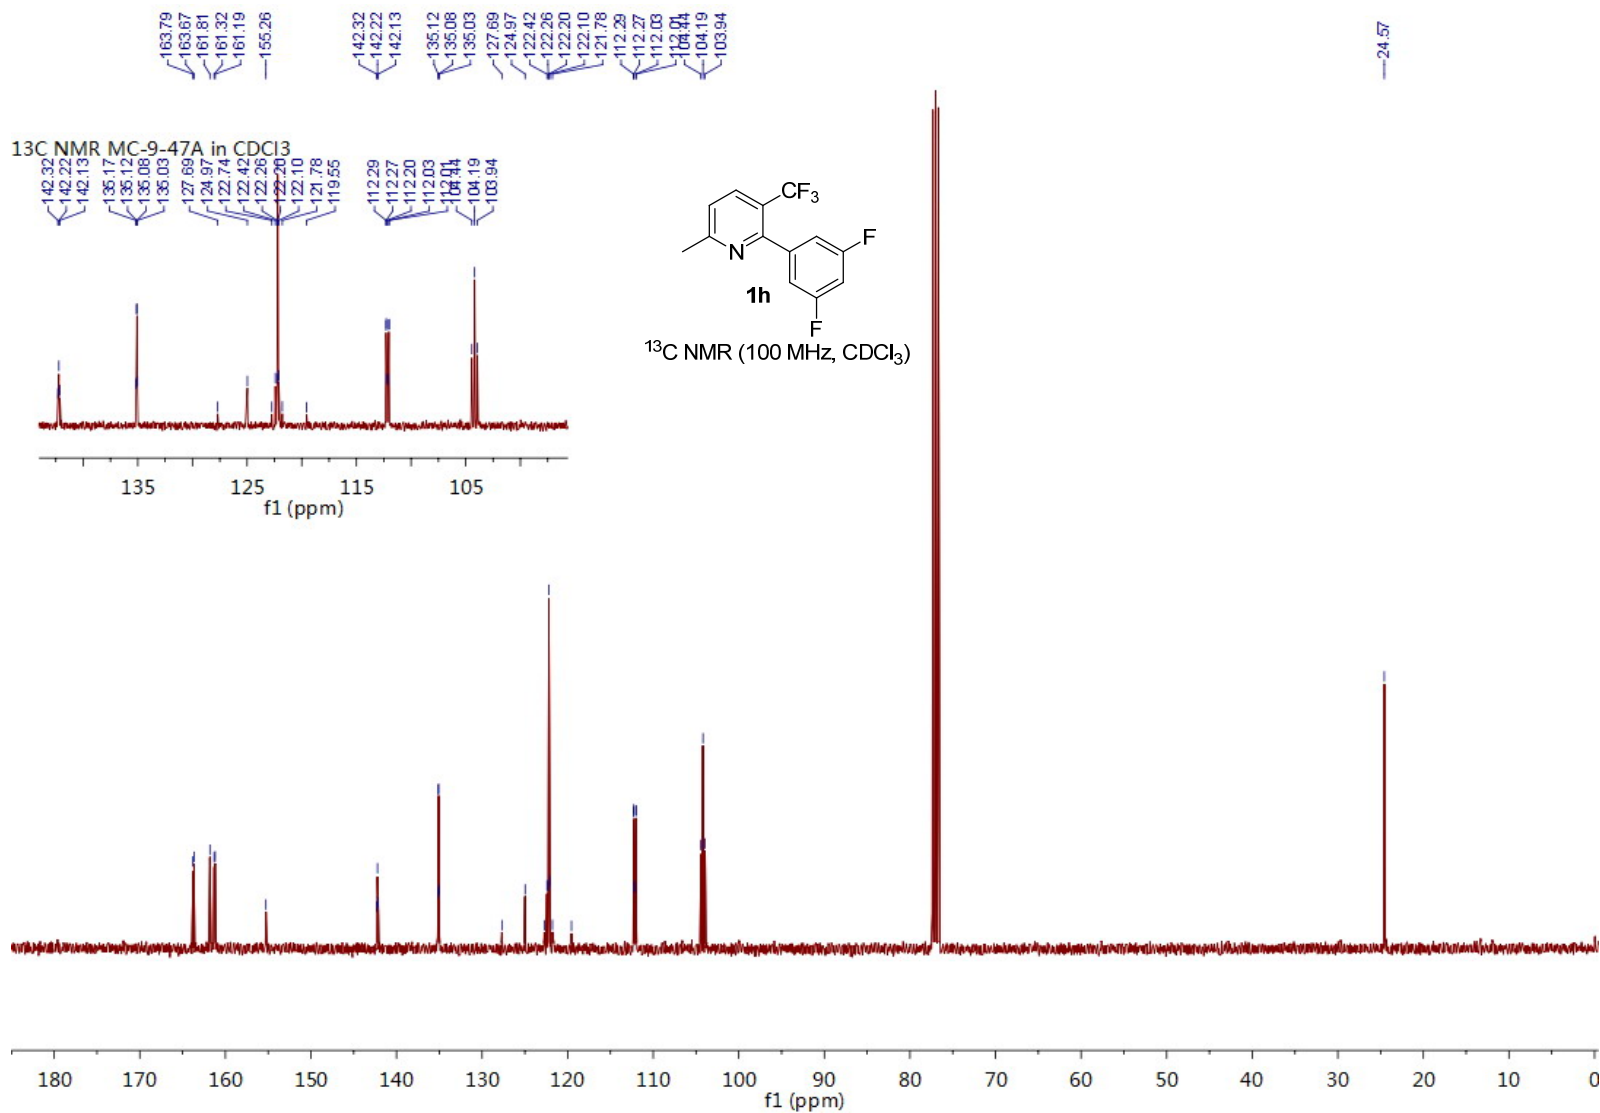

19F NMR MC-9-47A in CDCl3

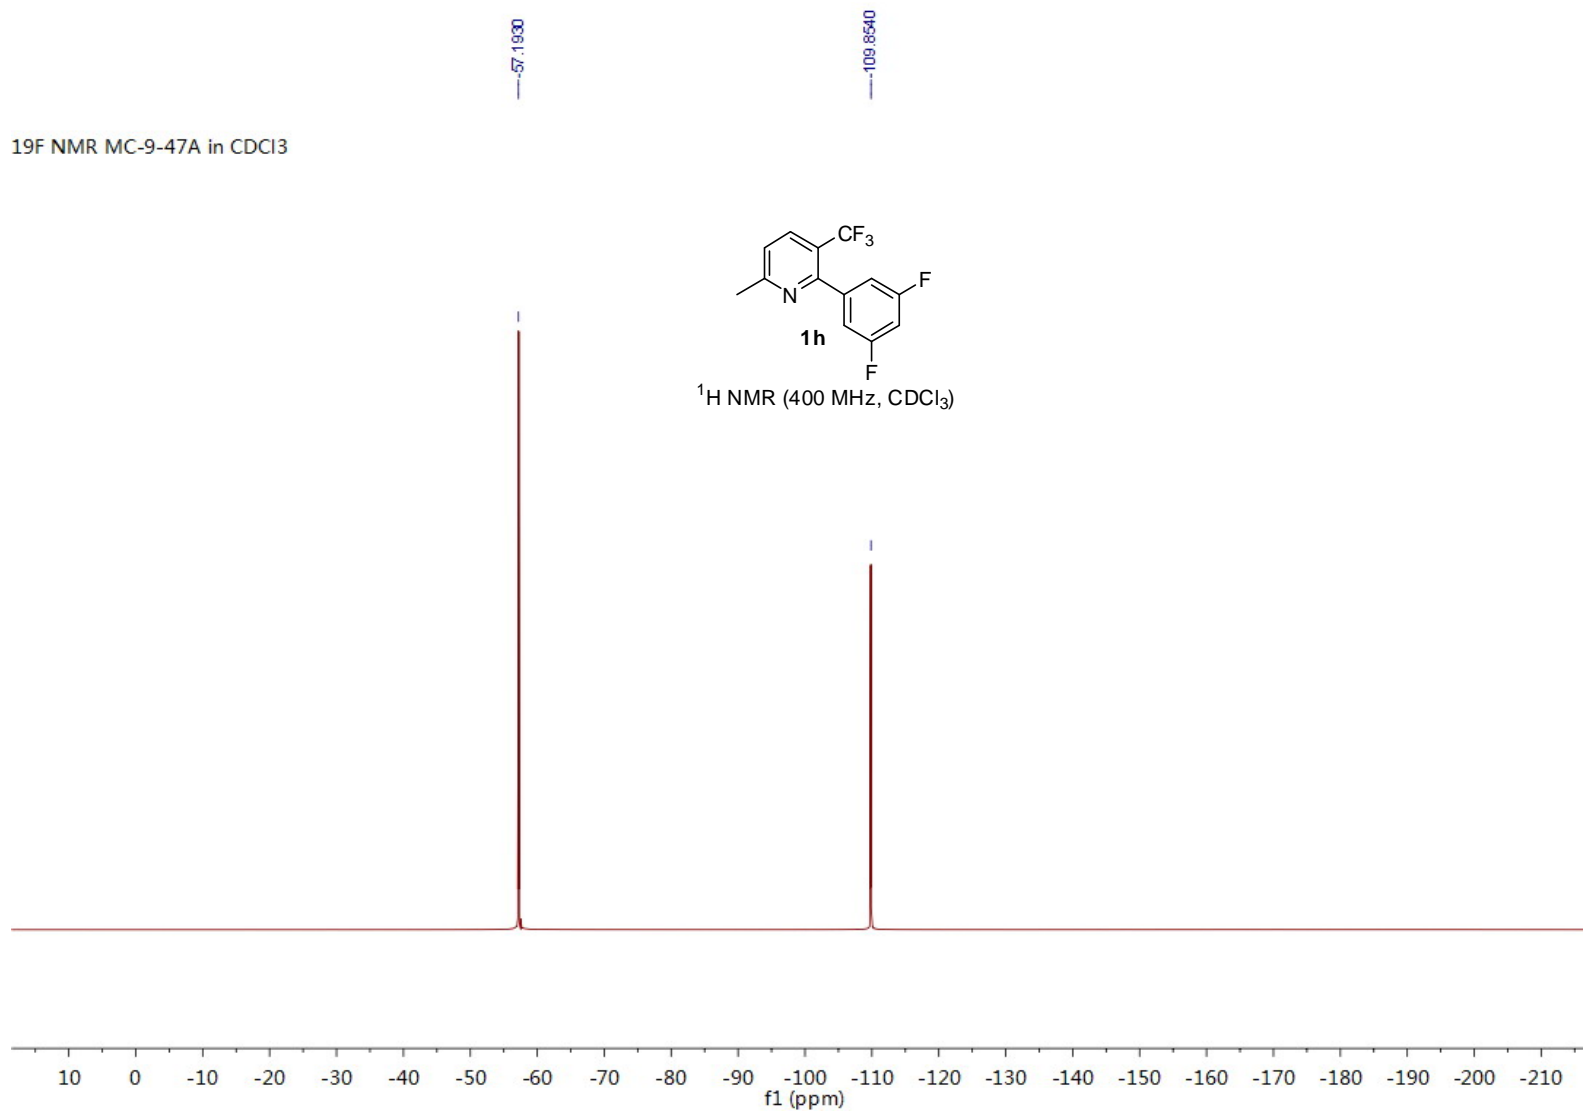

7.9652  
7.9348  
7.5064  
7.4946  
7.4410  
7.4383  
7.4298  
7.4275  
7.4202  
7.4150  
7.4134  
7.2473  
7.2271

2.9514  
2.9324  
2.9134  
2.8943

1.3657  
1.3543  
1.3368  
1.3352  
1.3176  
1.3162

<sup>1</sup>H NMR MC-10-9 in CDCl<sub>3</sub>

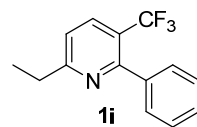

<sup>1</sup>H NMR (400 MHz, CDCl<sub>3</sub>)

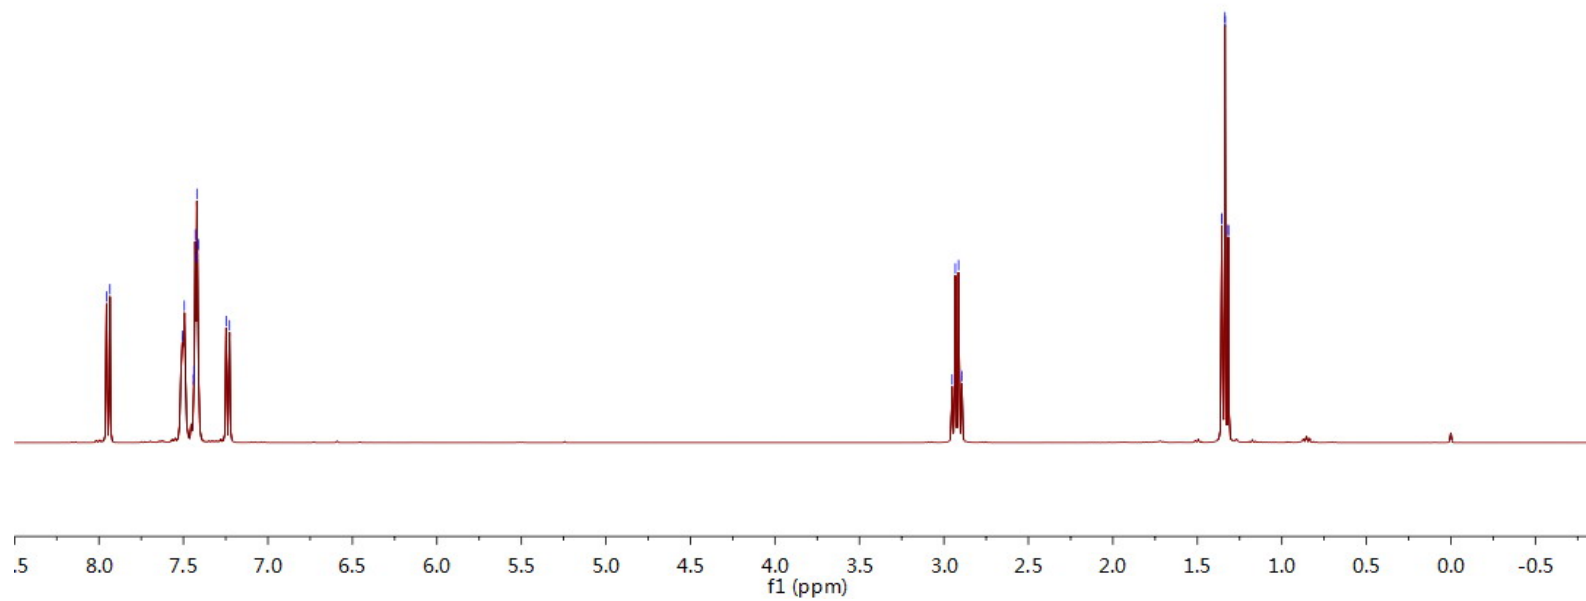

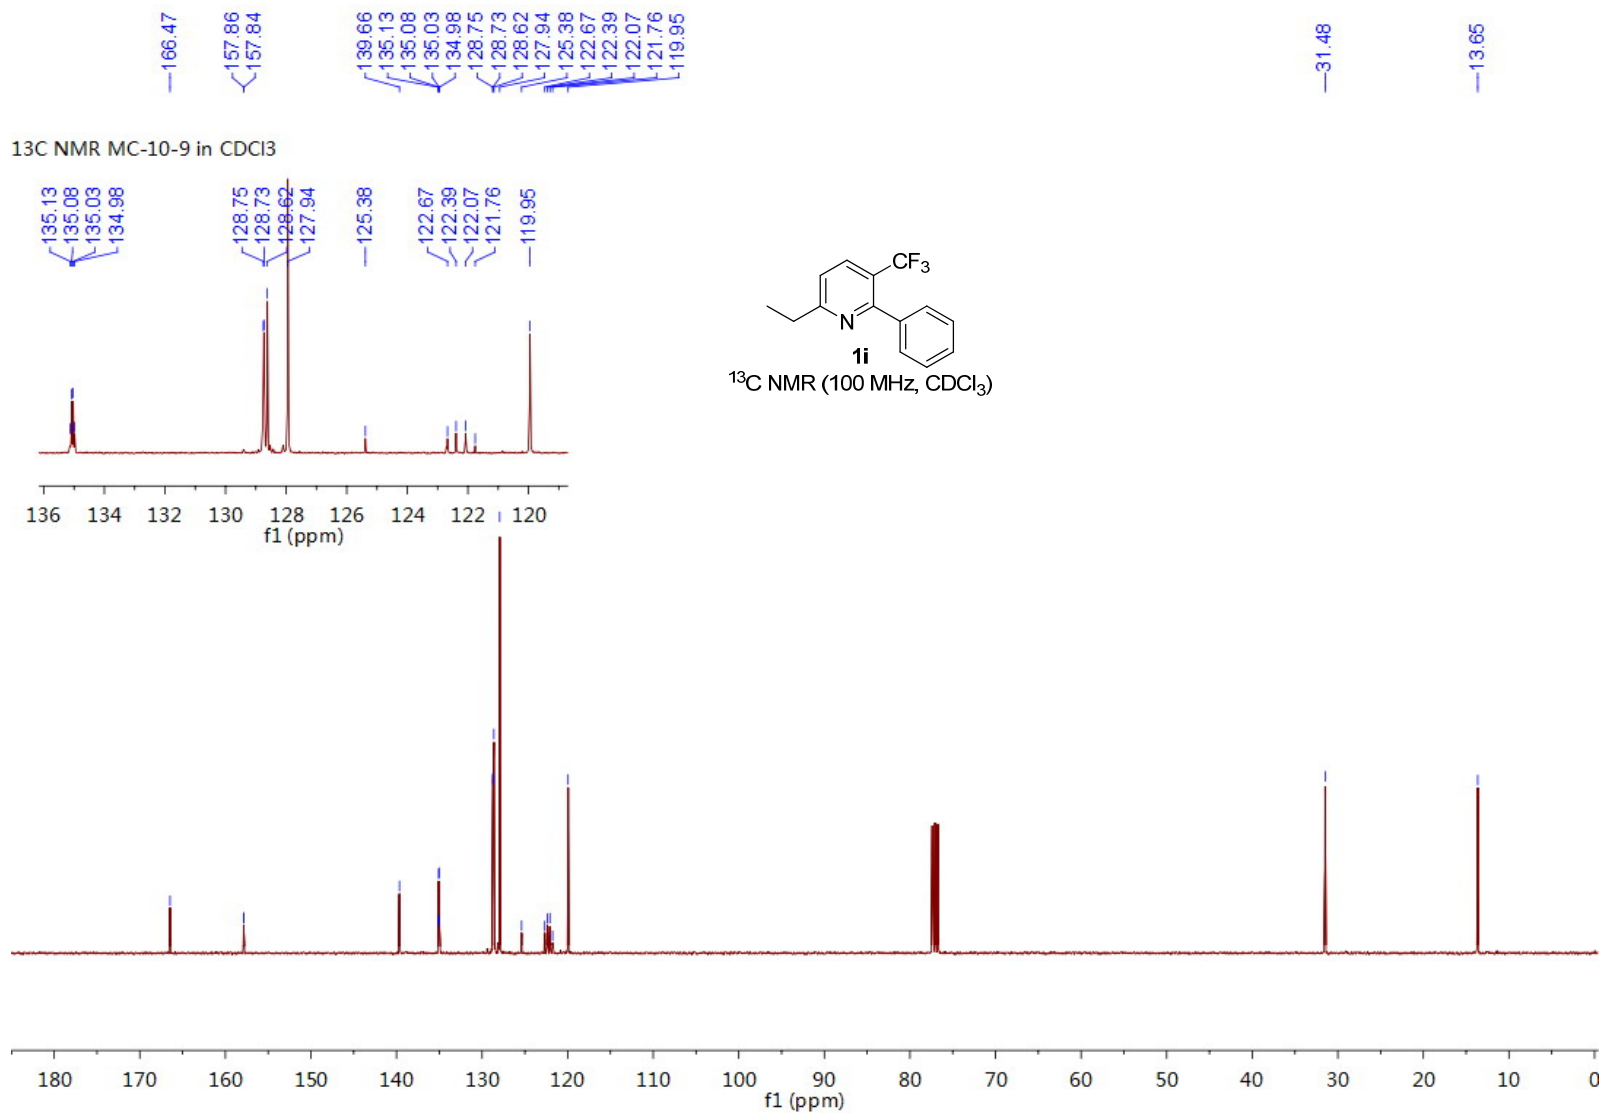

19F NMR MC-10-9 in CDCl3

—56.9314

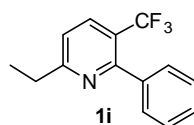

**1i**

<sup>1</sup>H NMR (400 MHz, CDCl<sub>3</sub>)

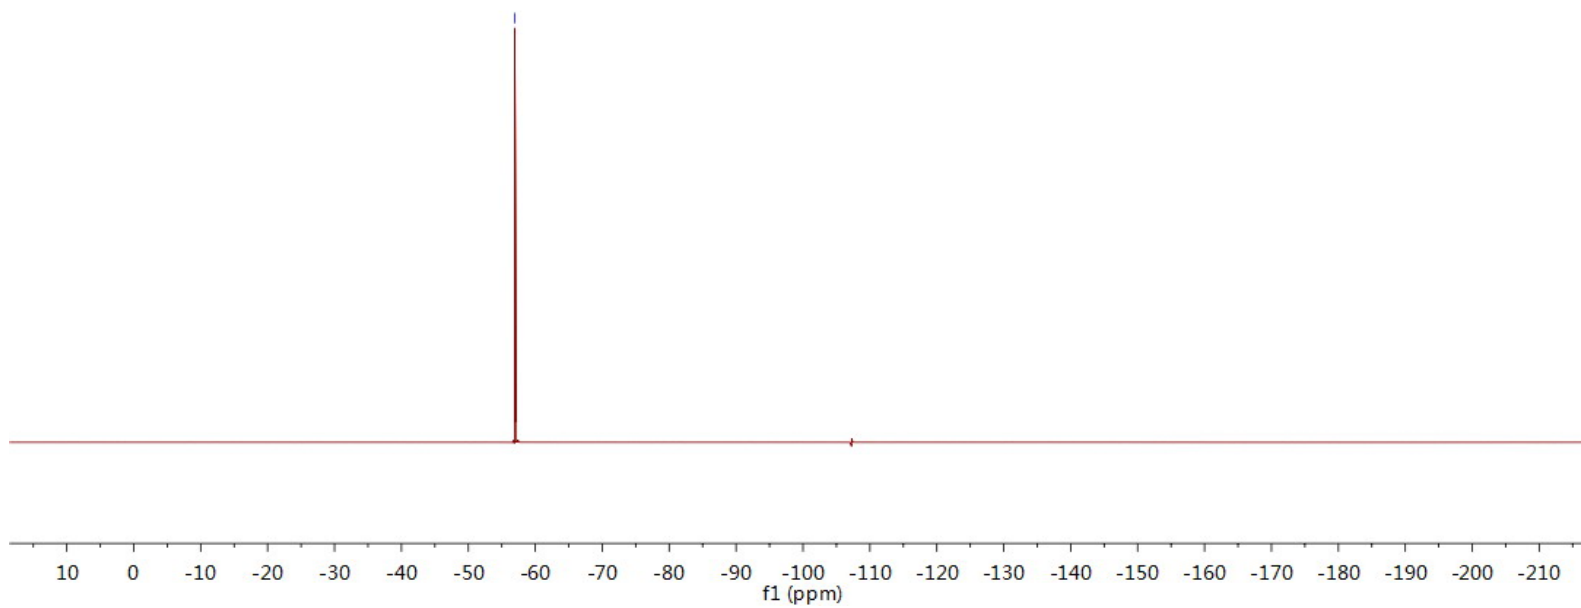

## 6.2 Copy of NMR for trifluoromethyl piperidines

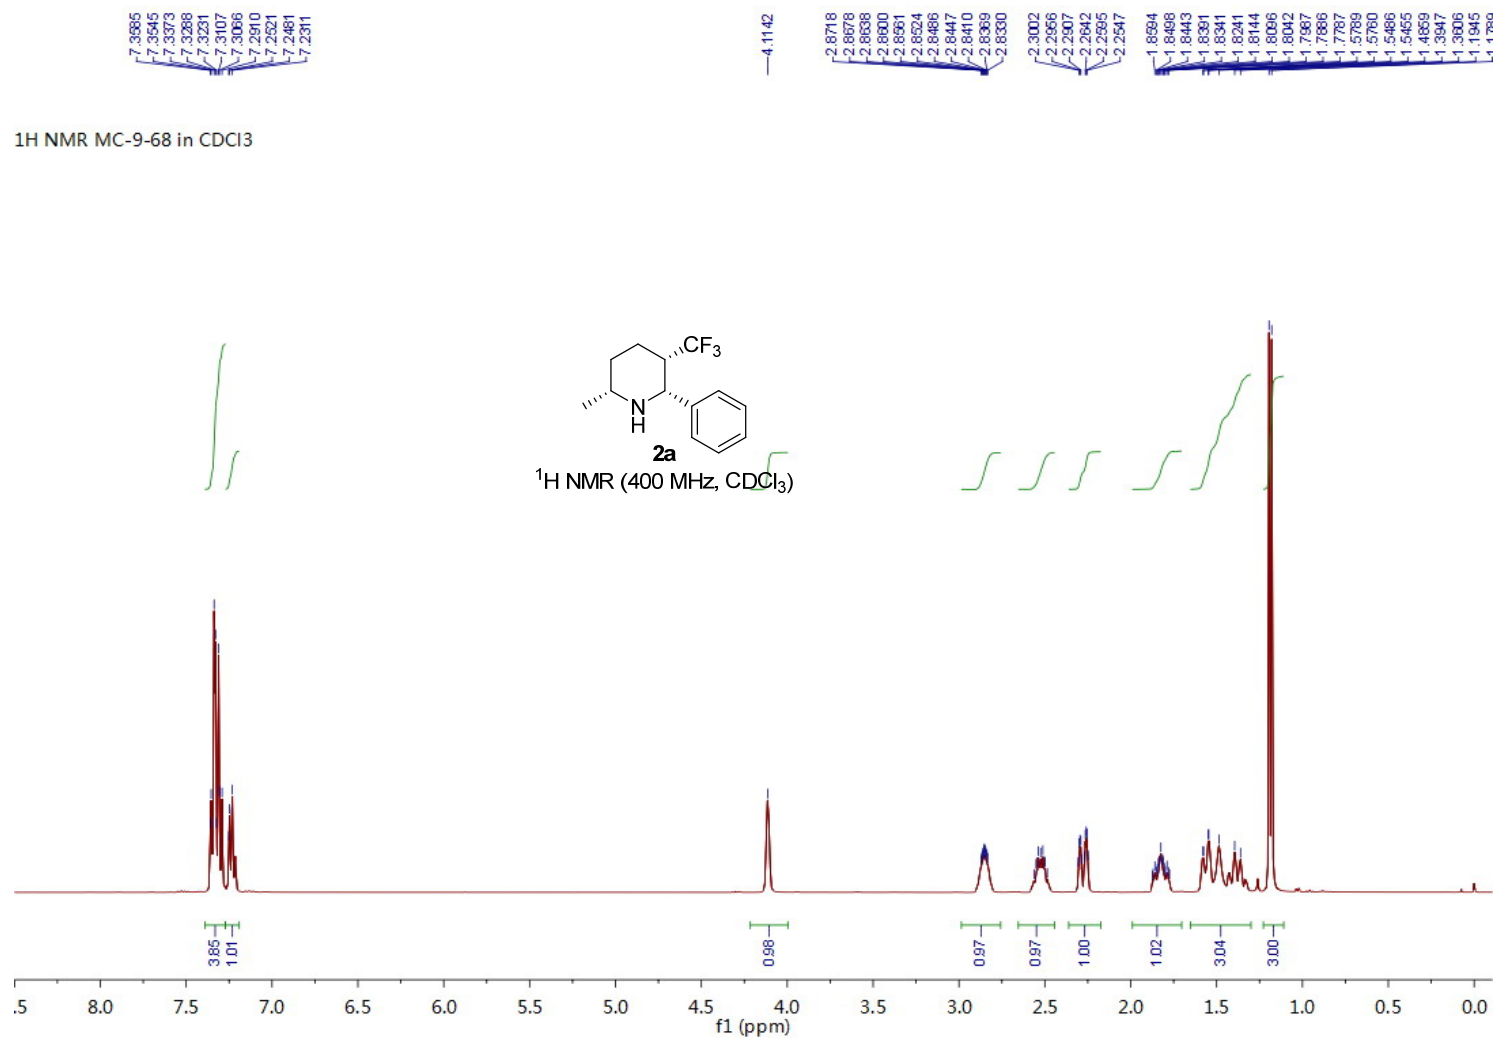

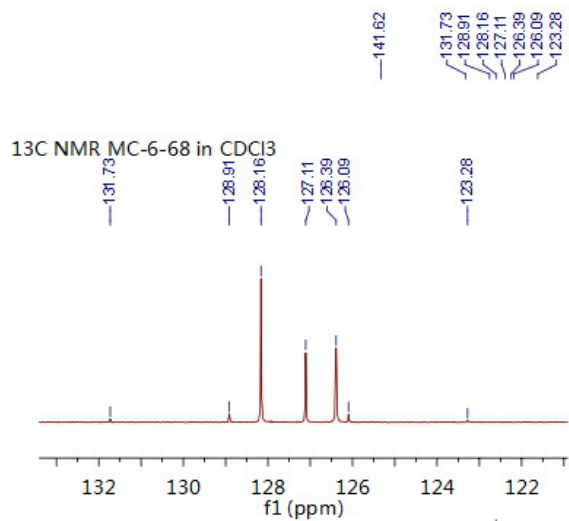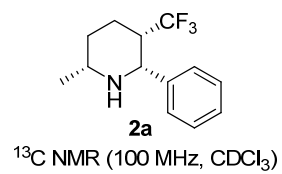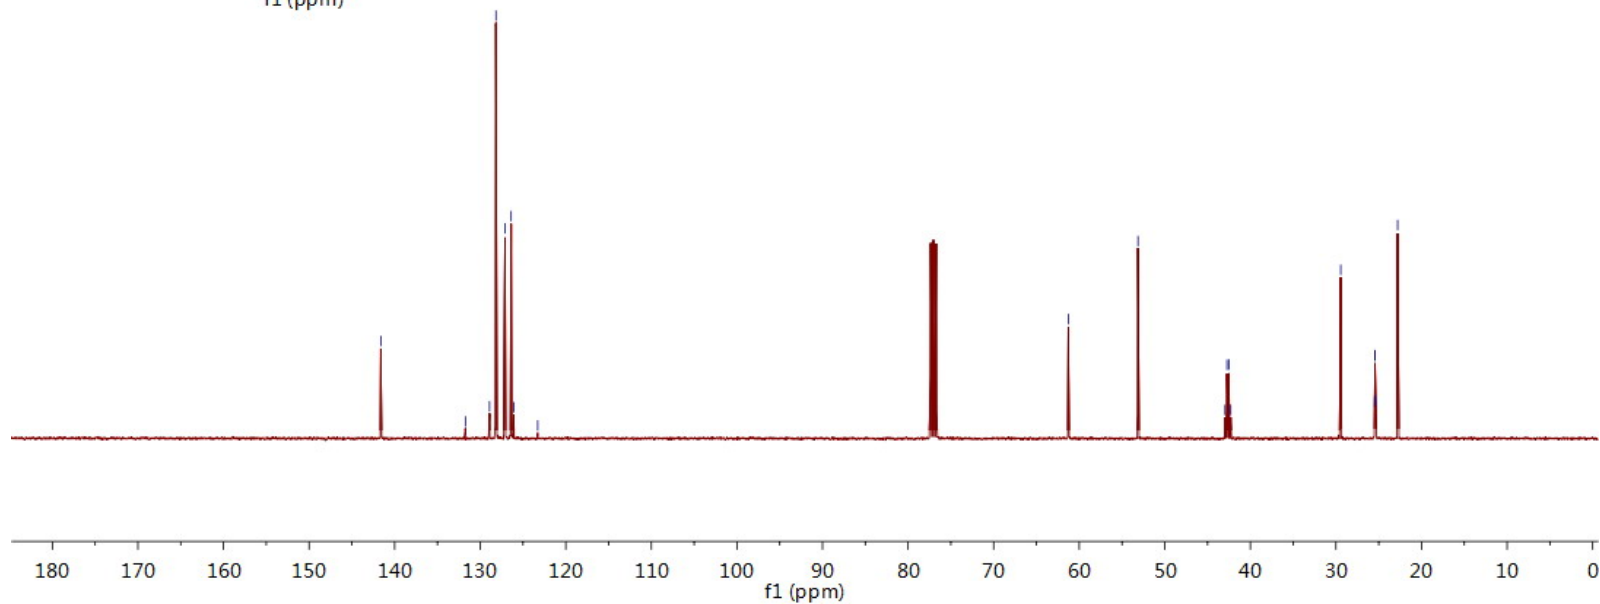

59.2108

19F NMR MC-9-68 in CDCl3

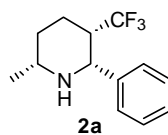

<sup>13</sup>C NMR (100 MHz, CDCl<sub>3</sub>)

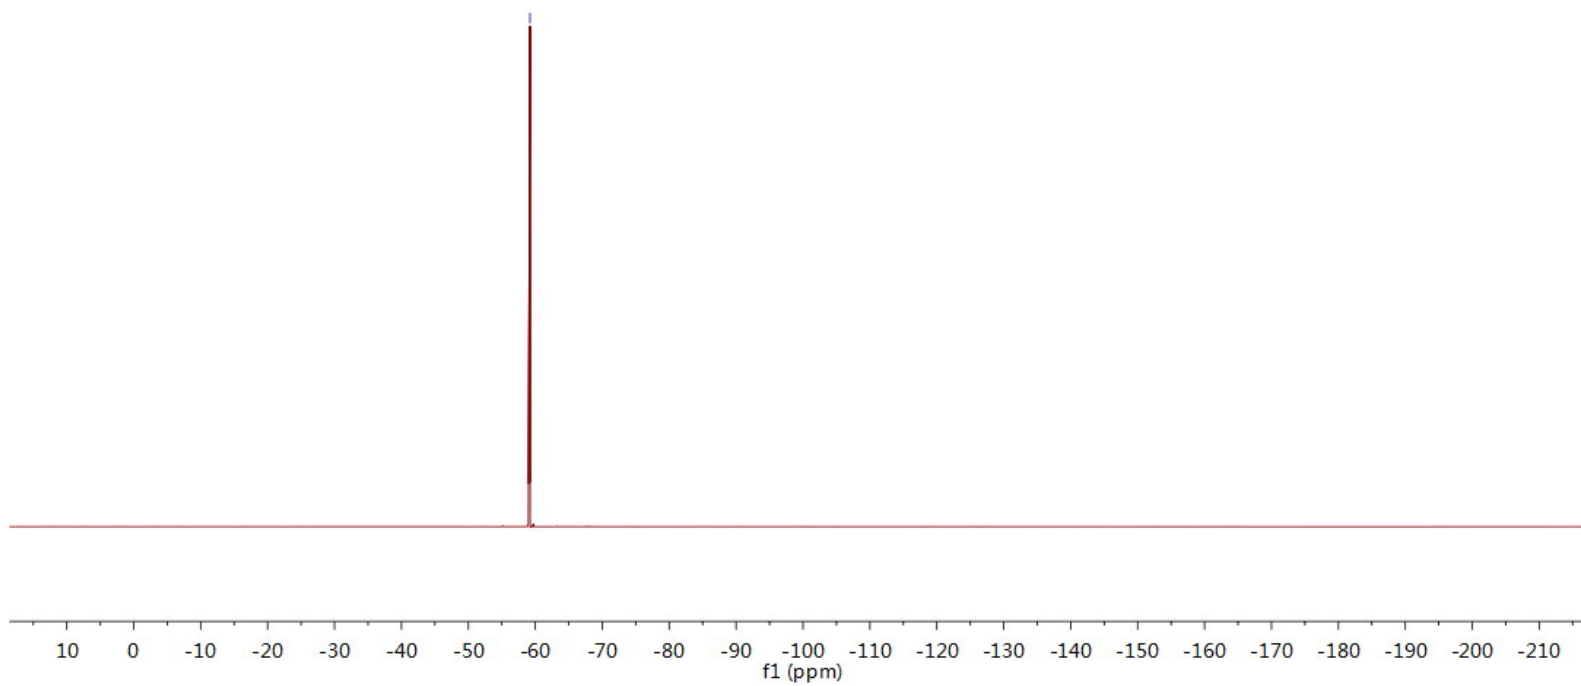



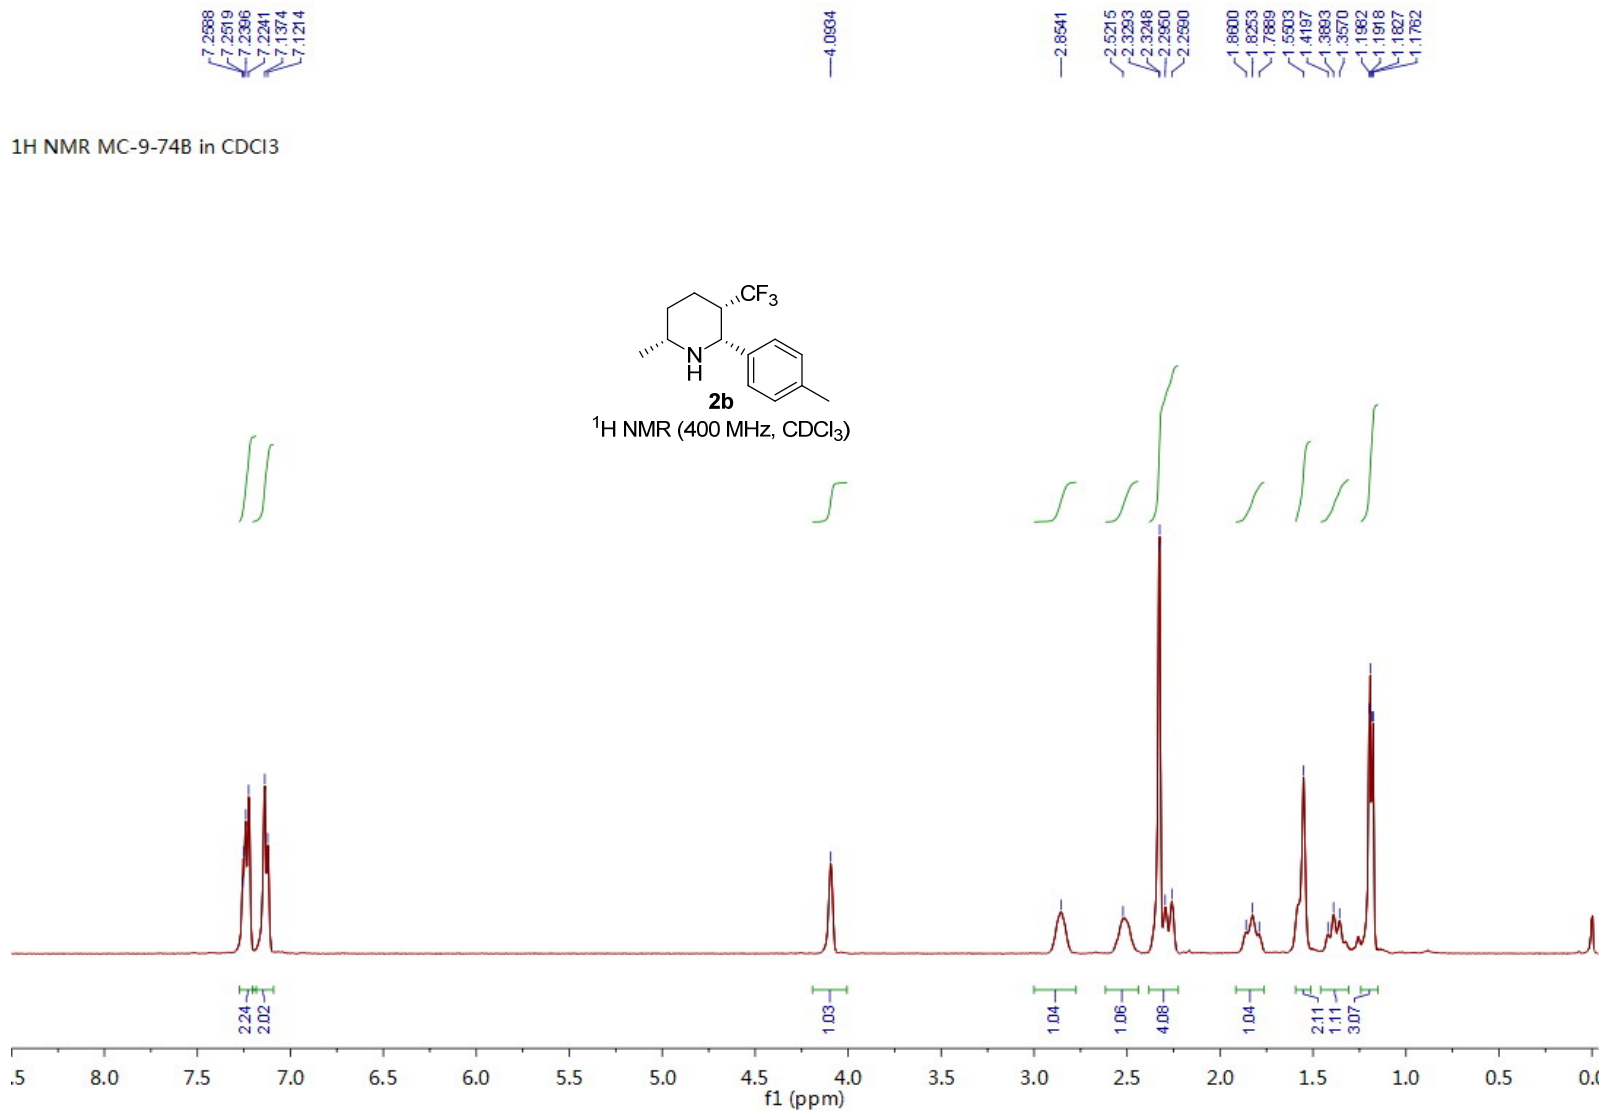

<sup>13</sup>C NMR MC-9-74B in CDCl<sub>3</sub>

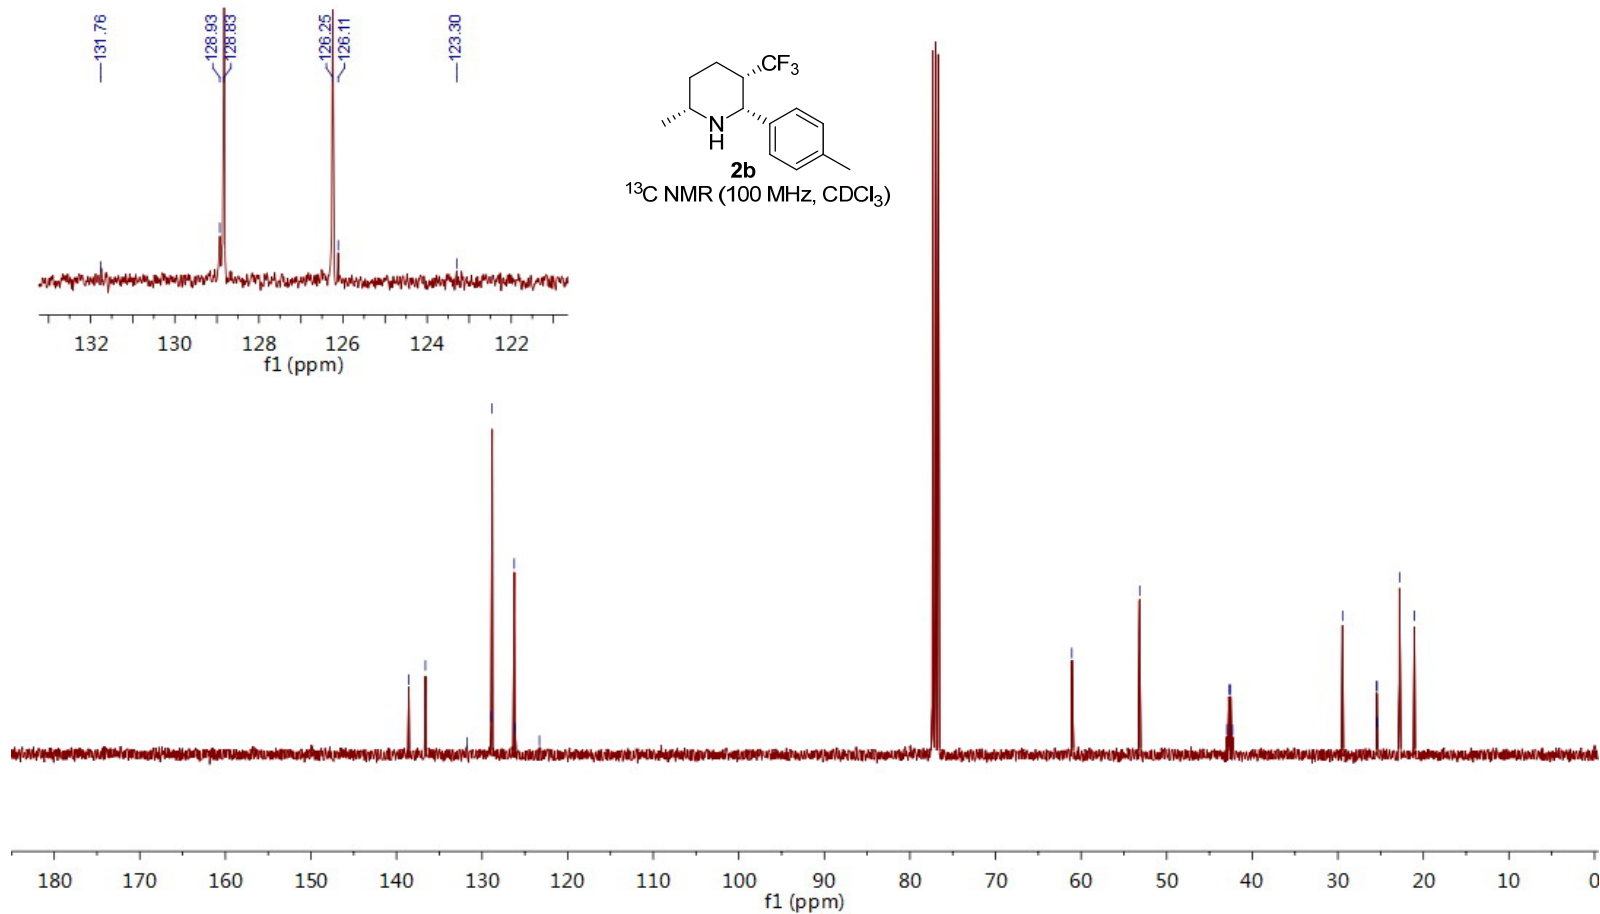

<sup>19</sup>F NMR MC-9-74B in CDCl<sub>3</sub>

-59.1803

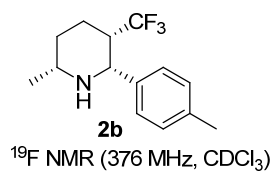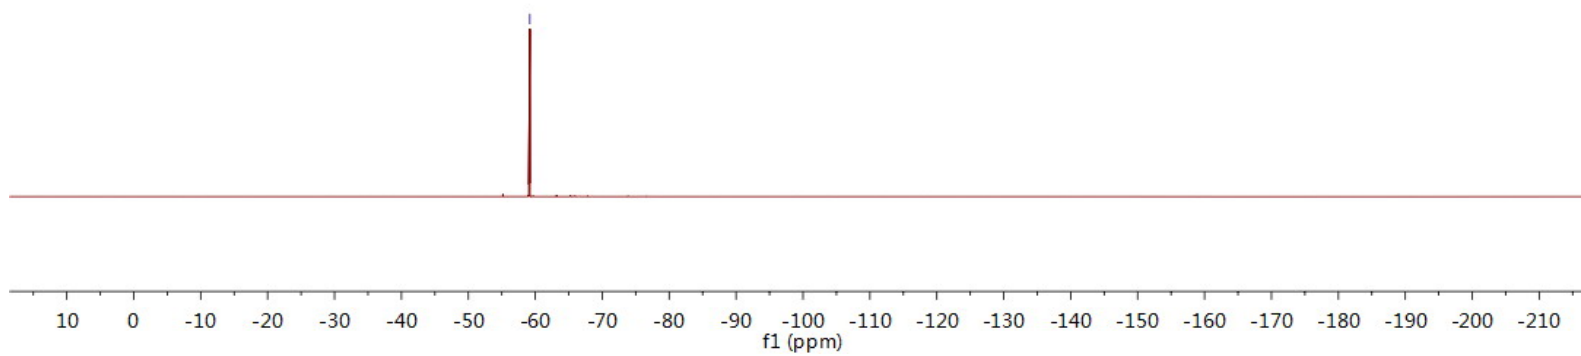

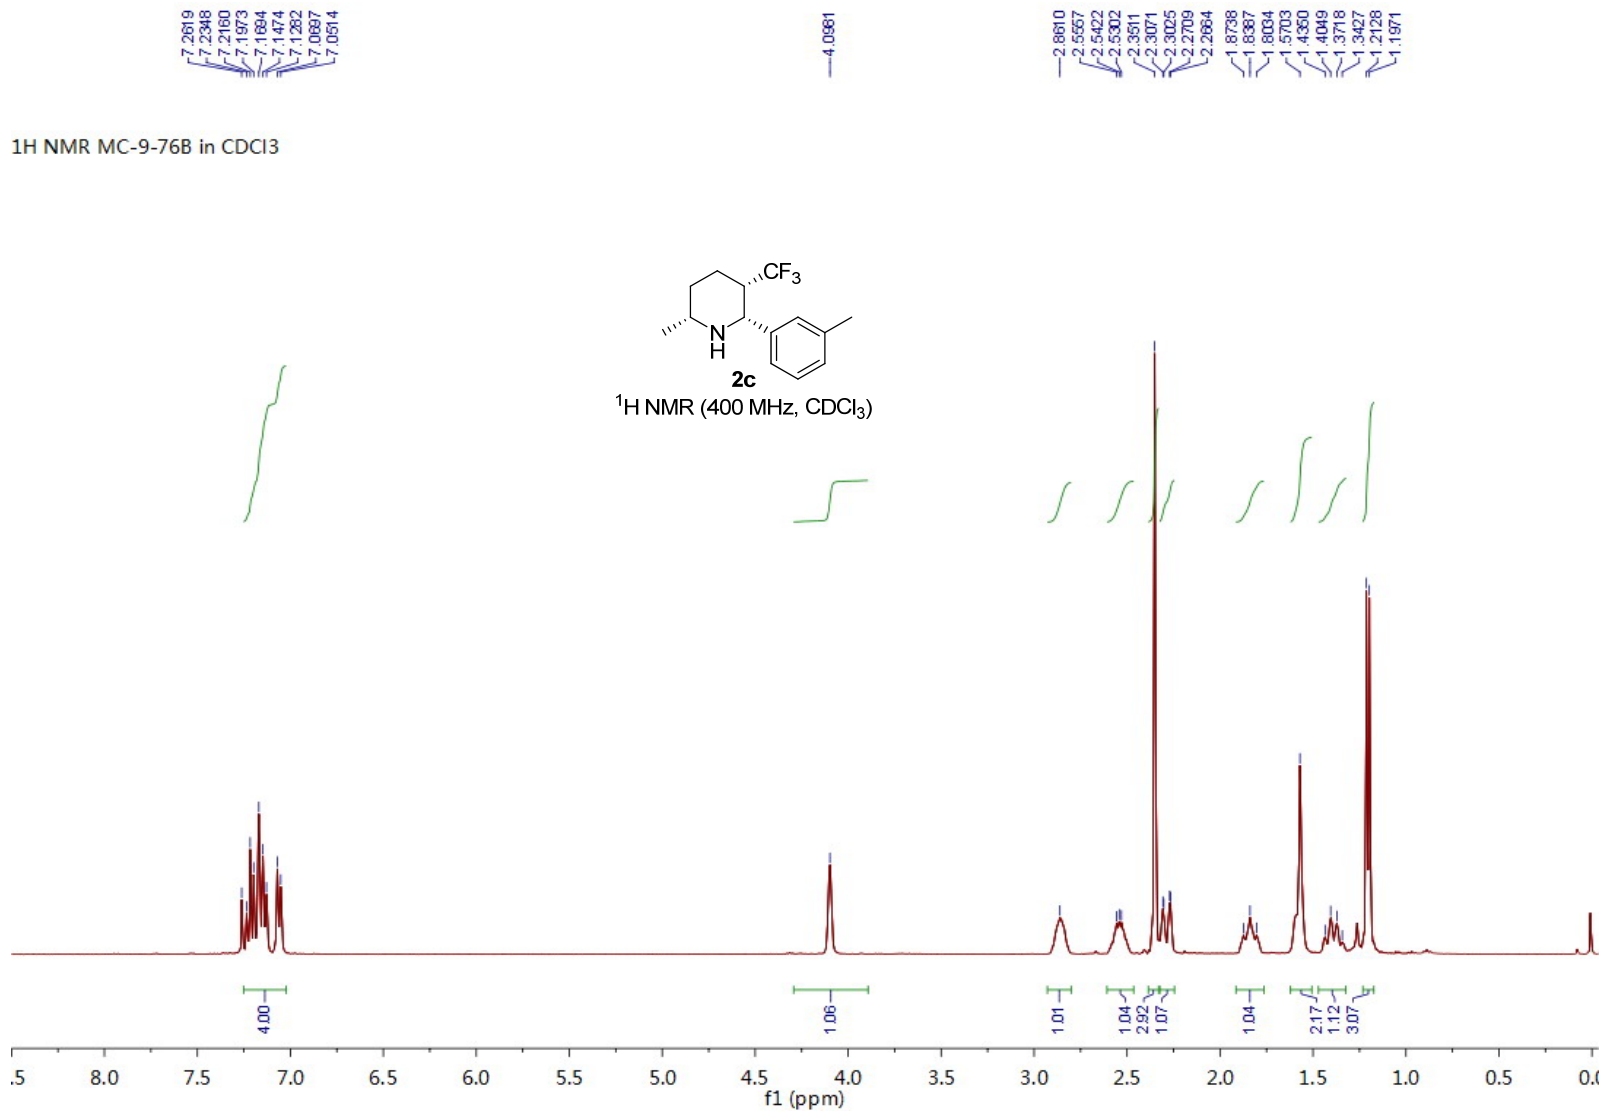

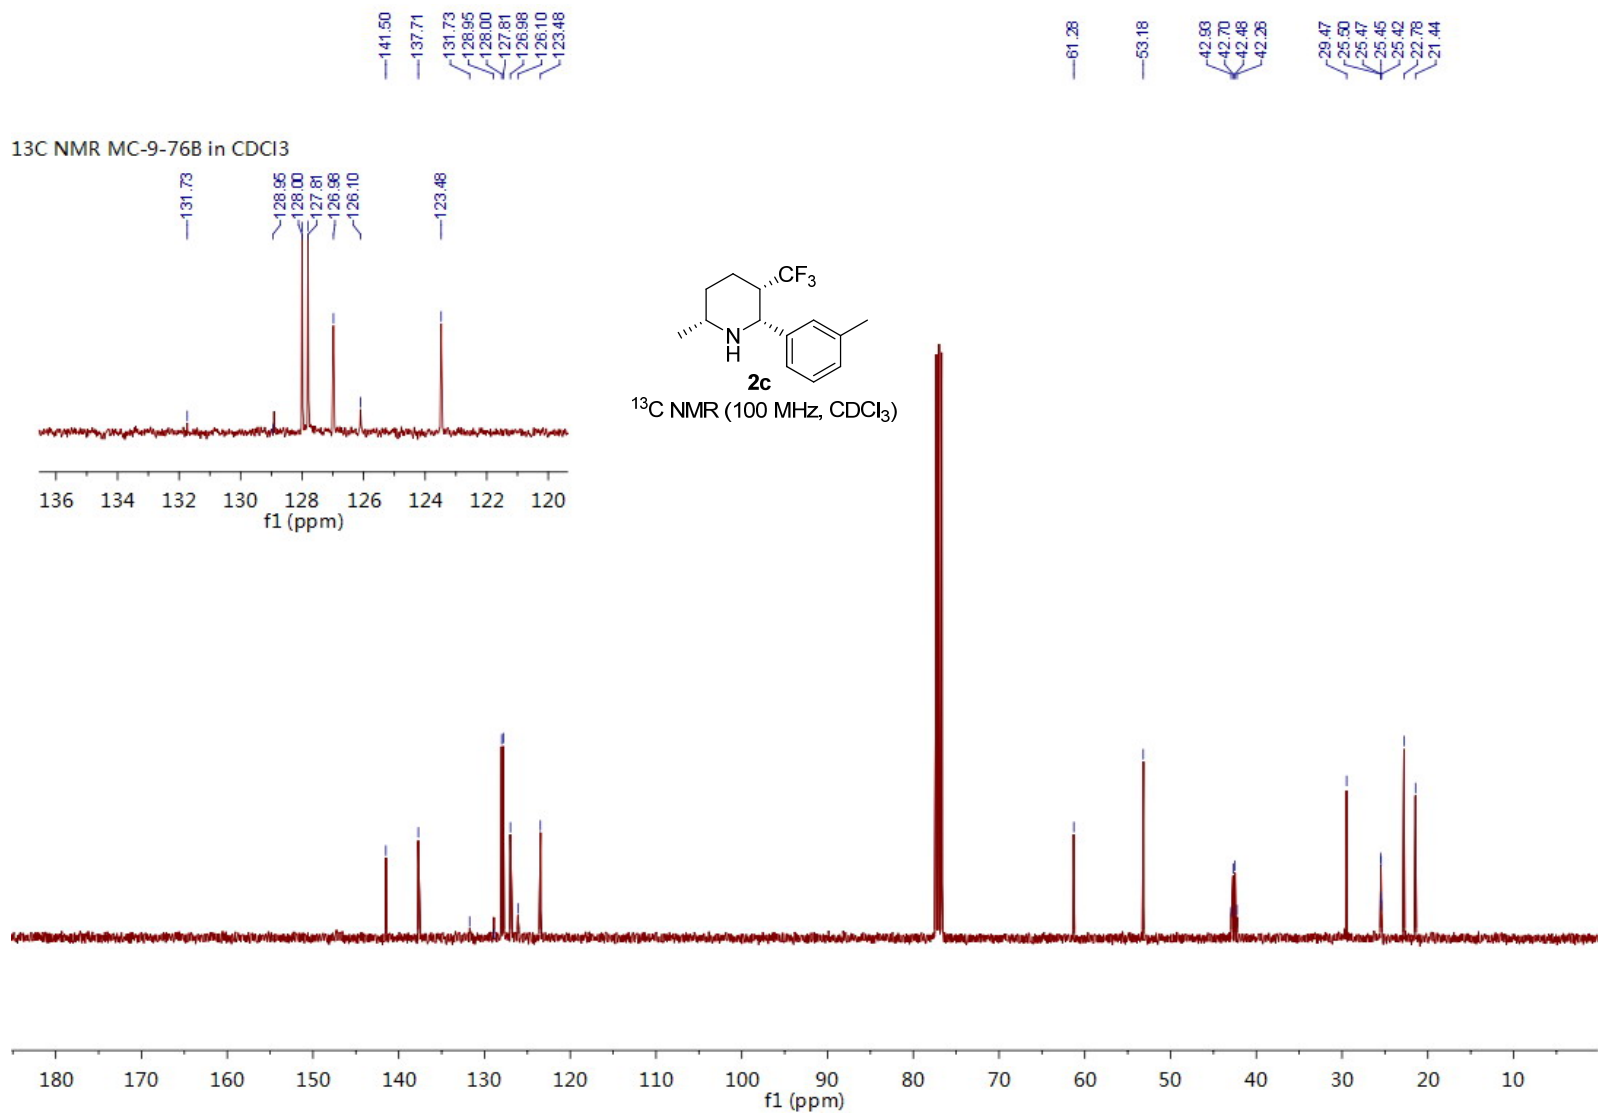

59.2472

<sup>19</sup>F NMR MC-9-76B in CDCl<sub>3</sub>

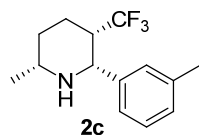

<sup>19</sup>F NMR (376 MHz, CDCl<sub>3</sub>)

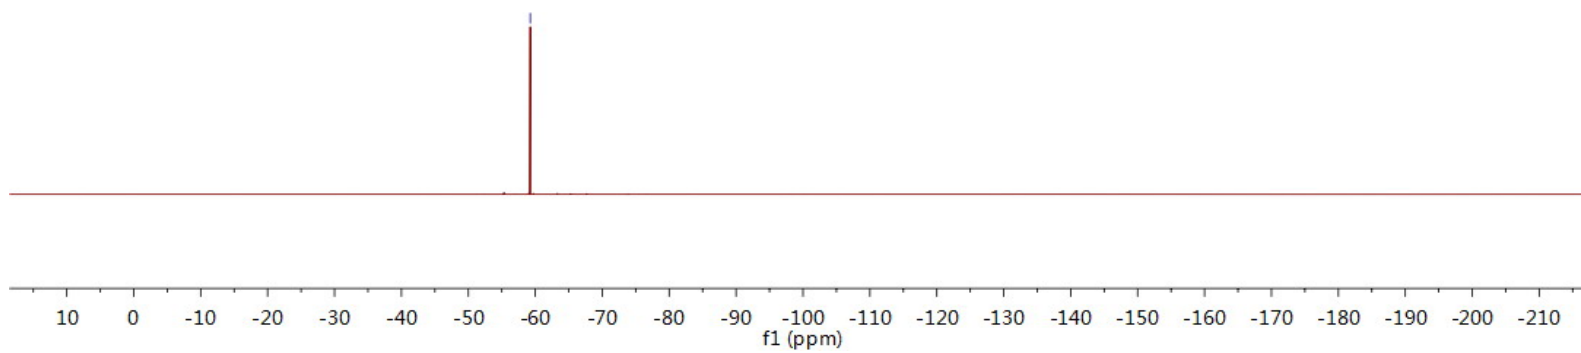

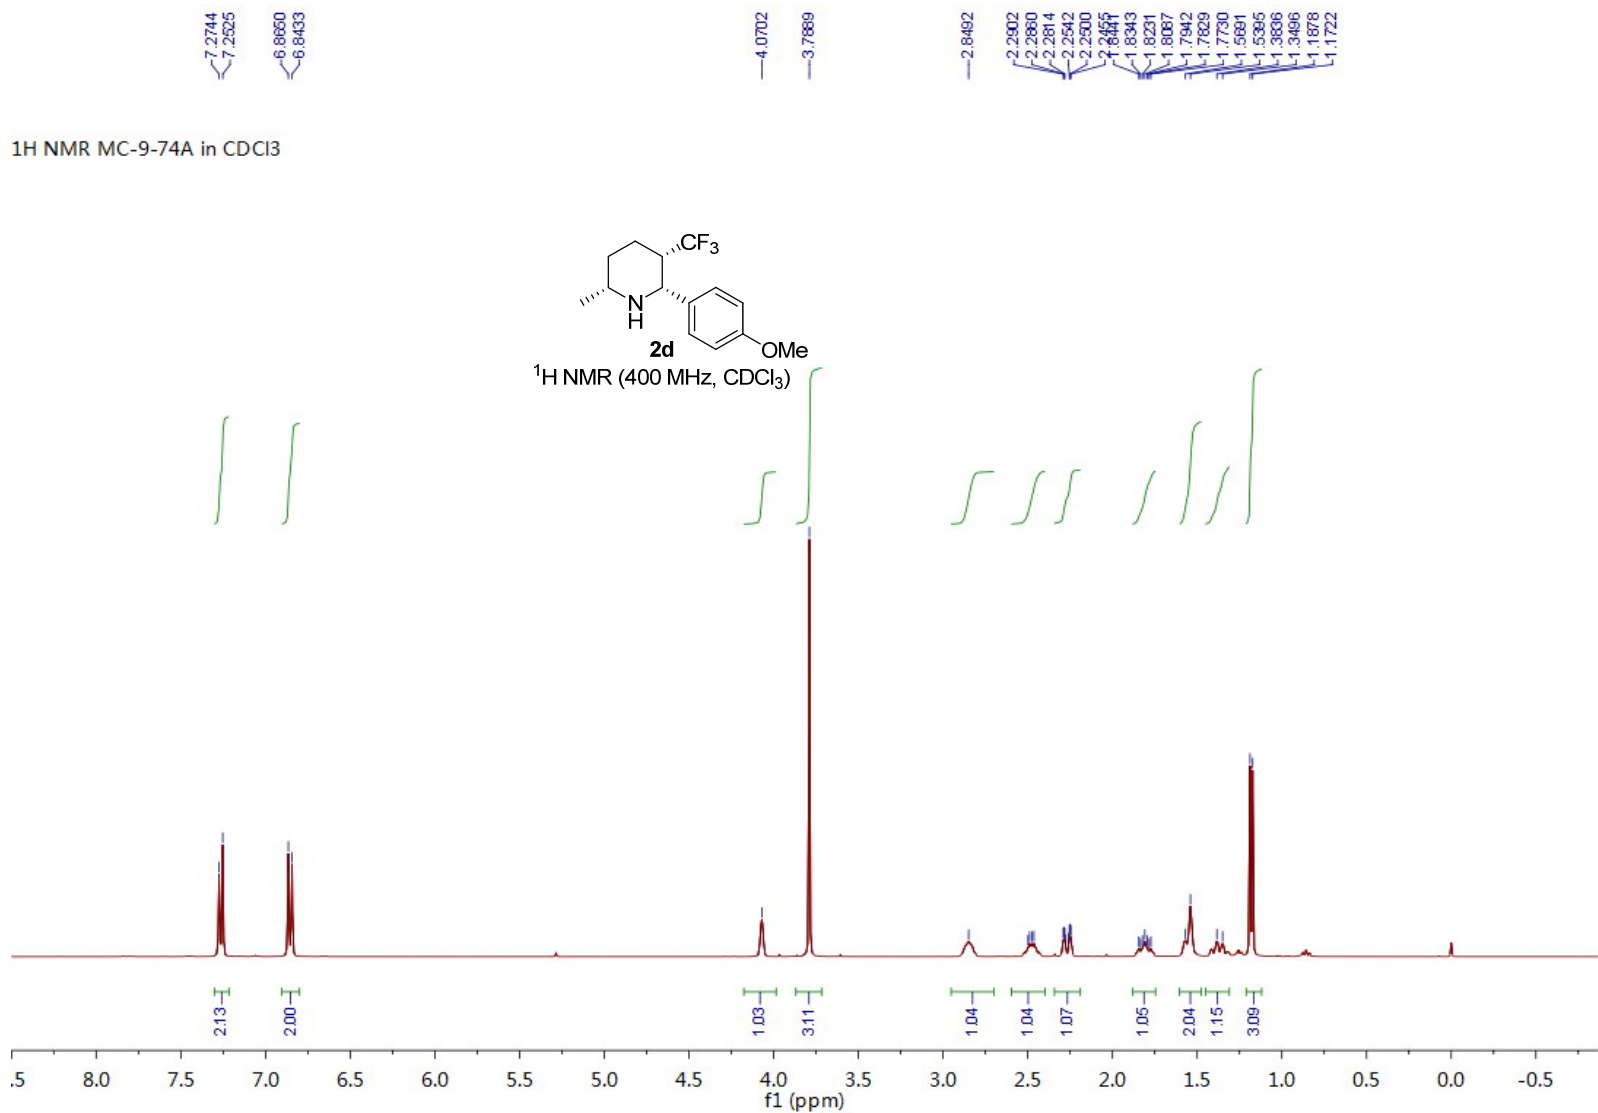

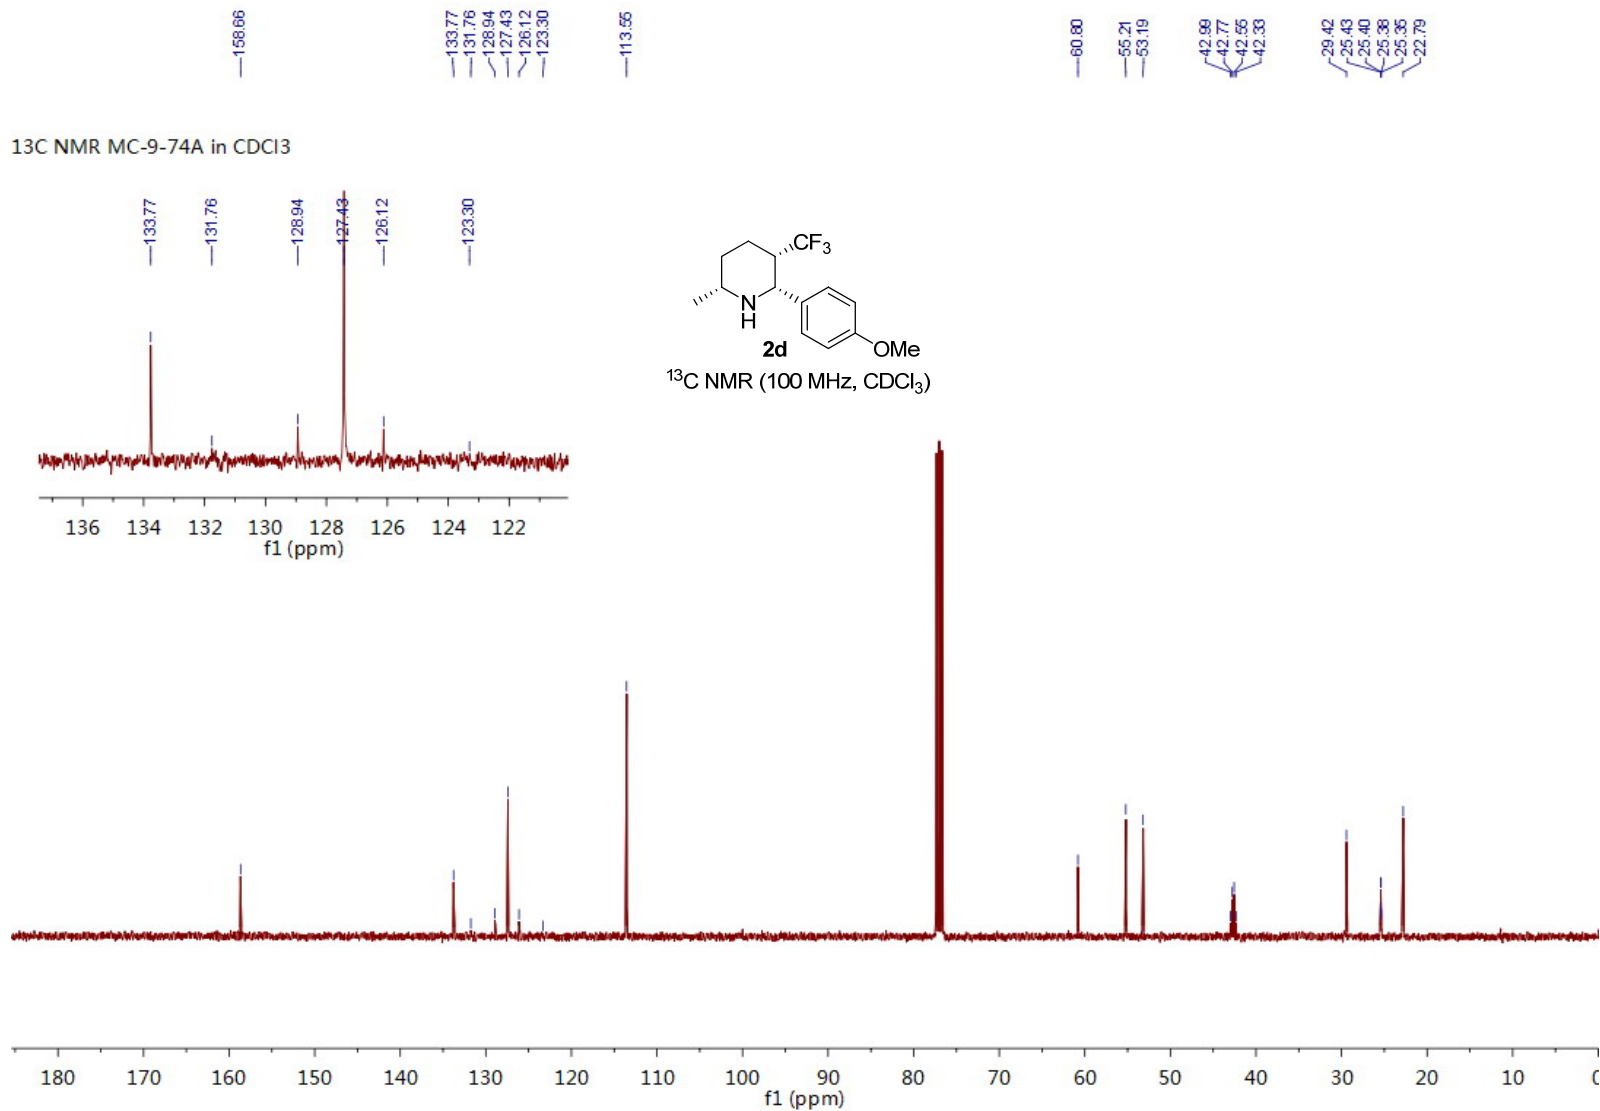



<sup>19</sup>F NMR MC-9-74A in CDCl<sub>3</sub>

-59.1672

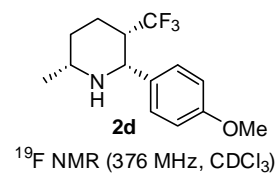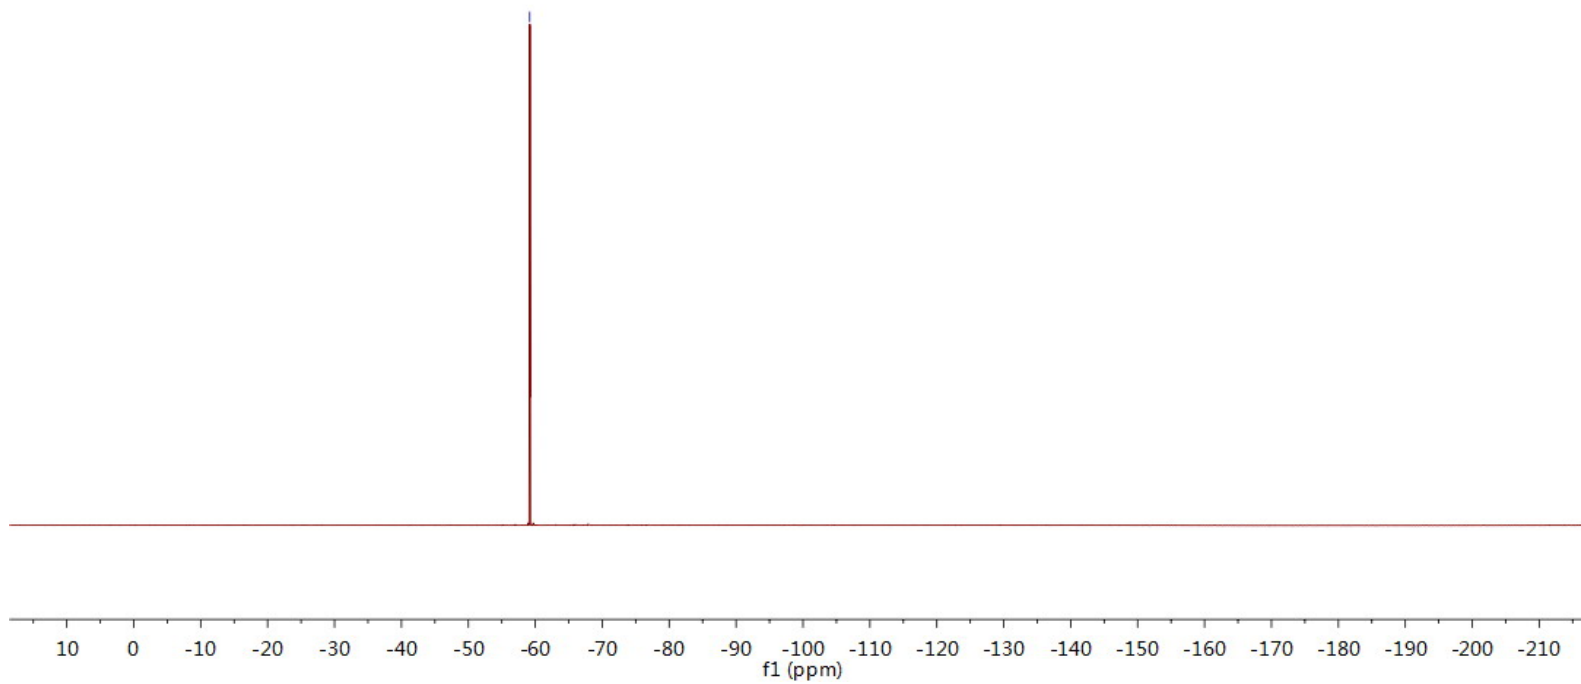

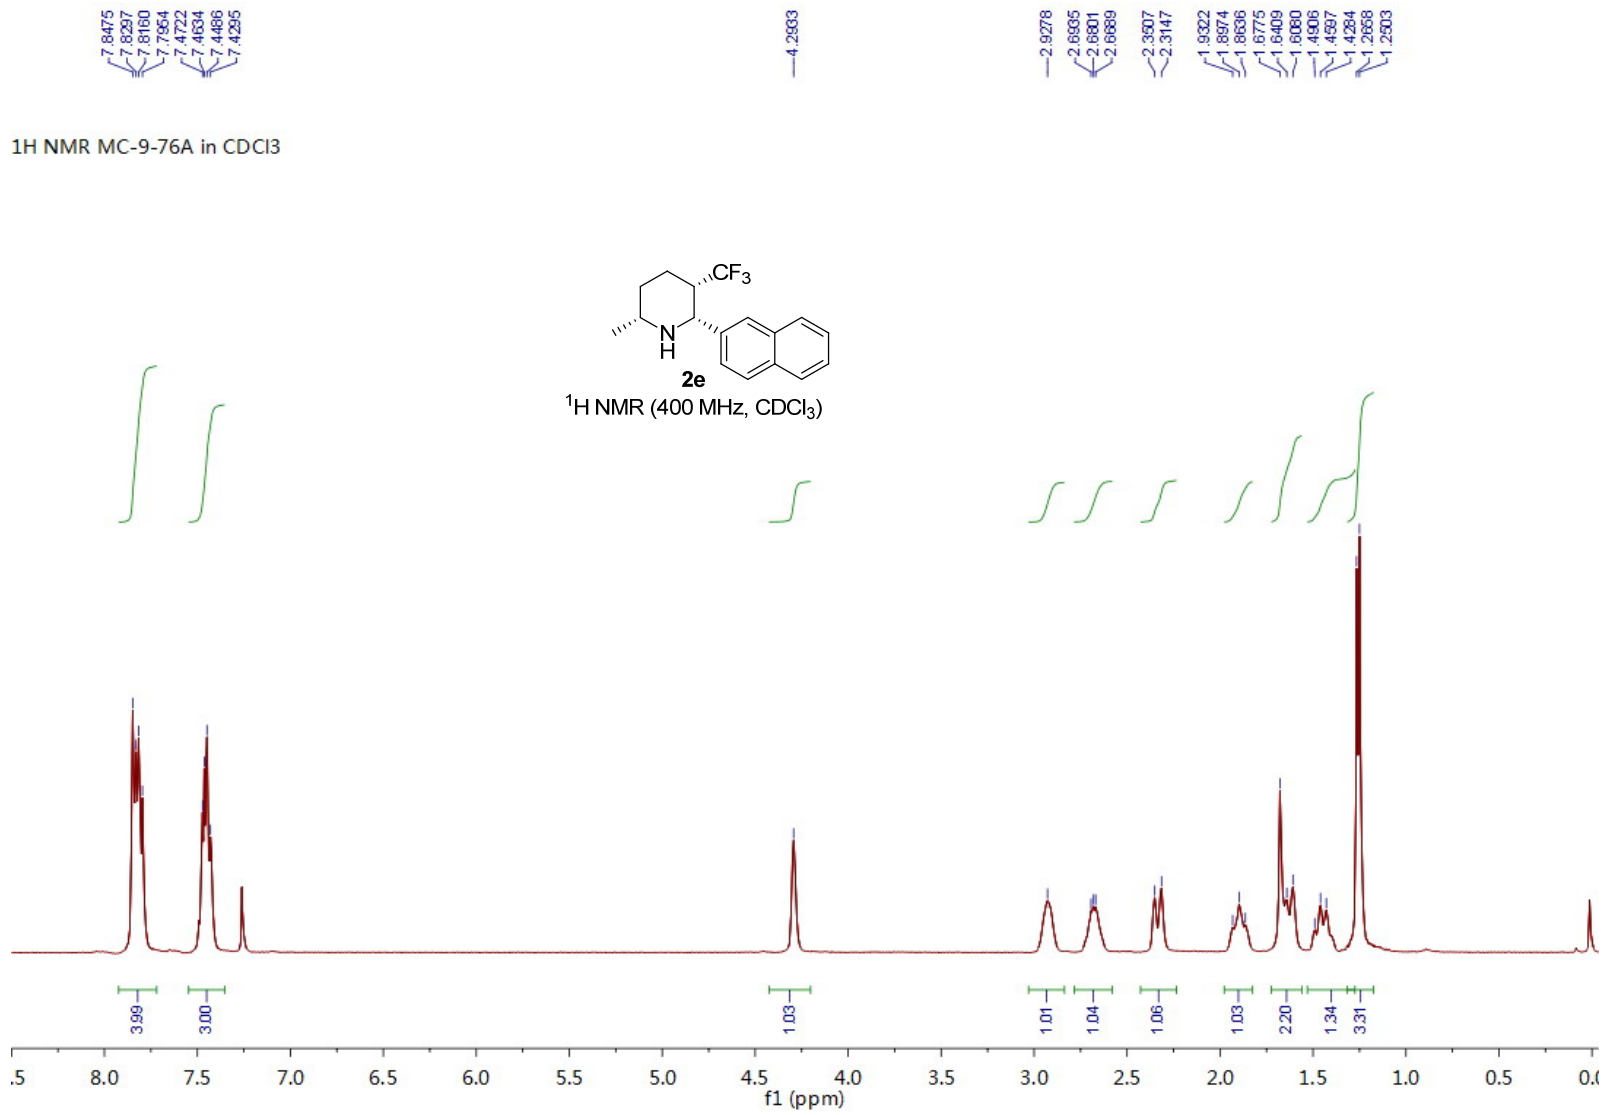

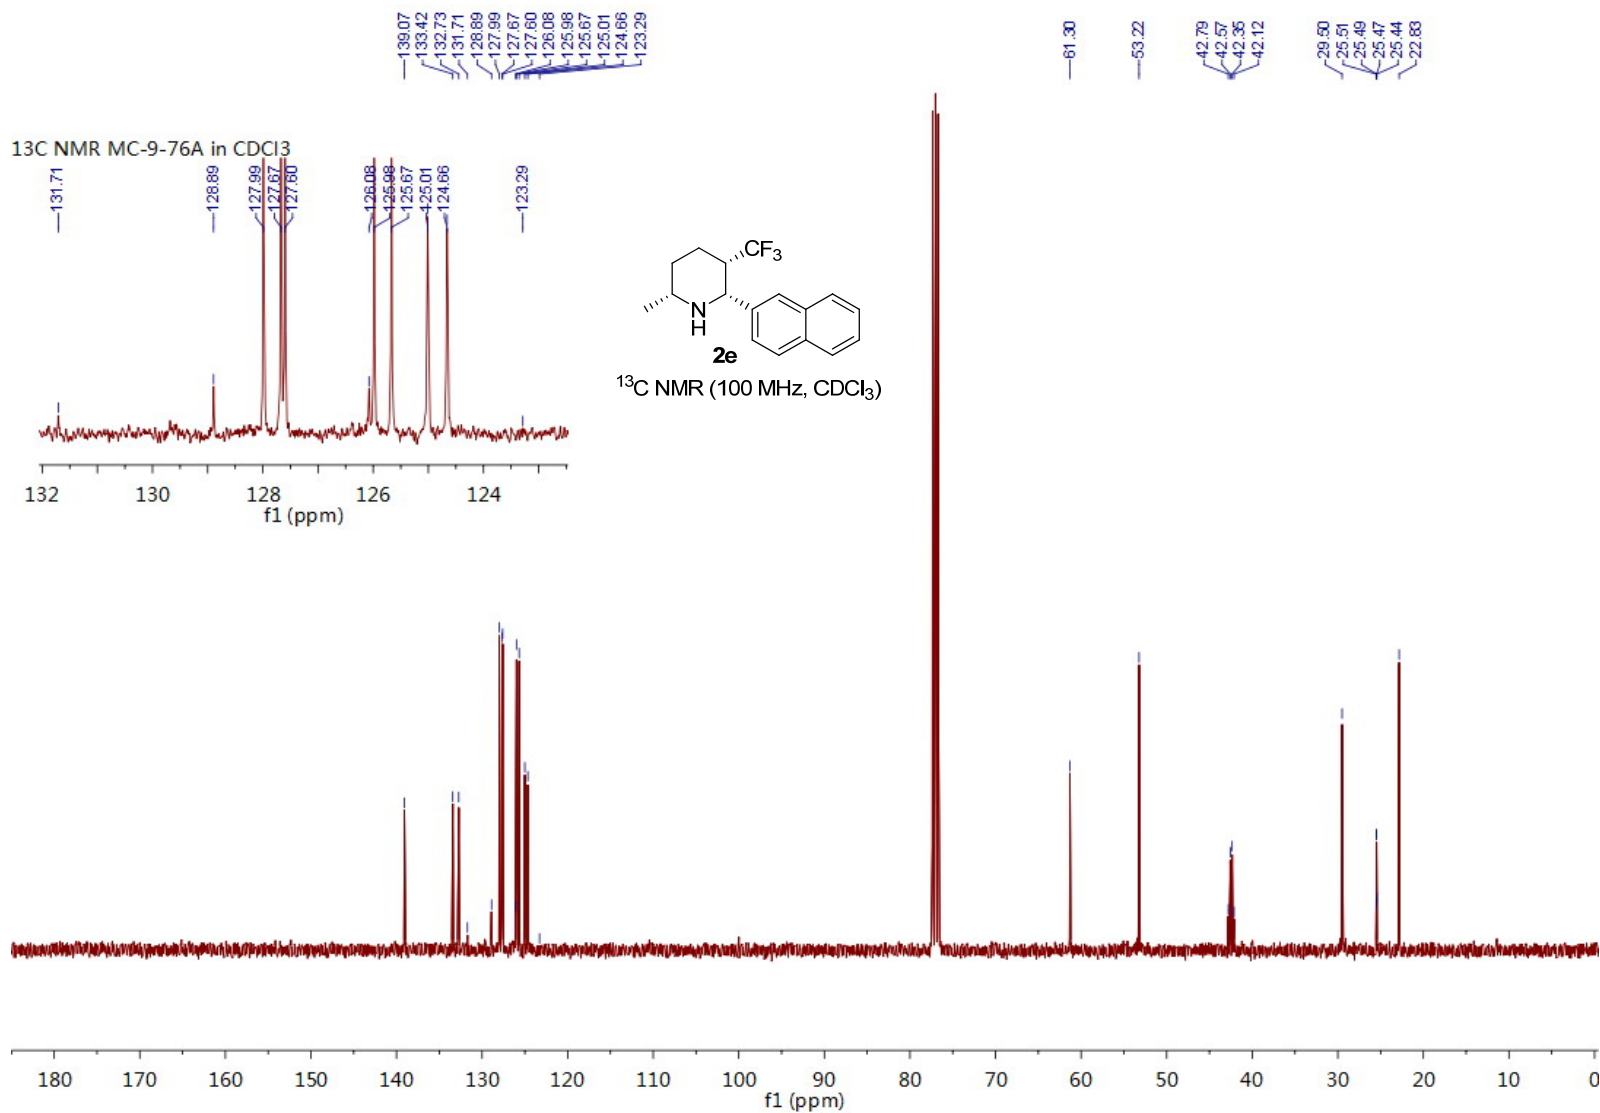

19F NMR MC-9-76A in CDCl3

-59.2342

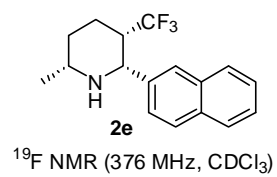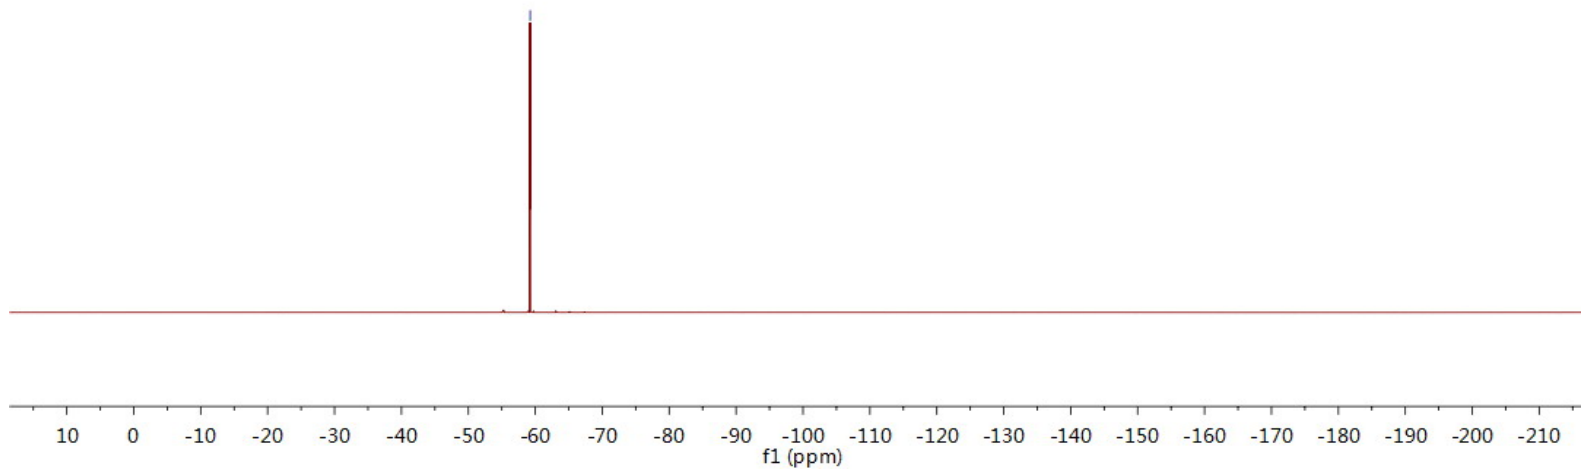

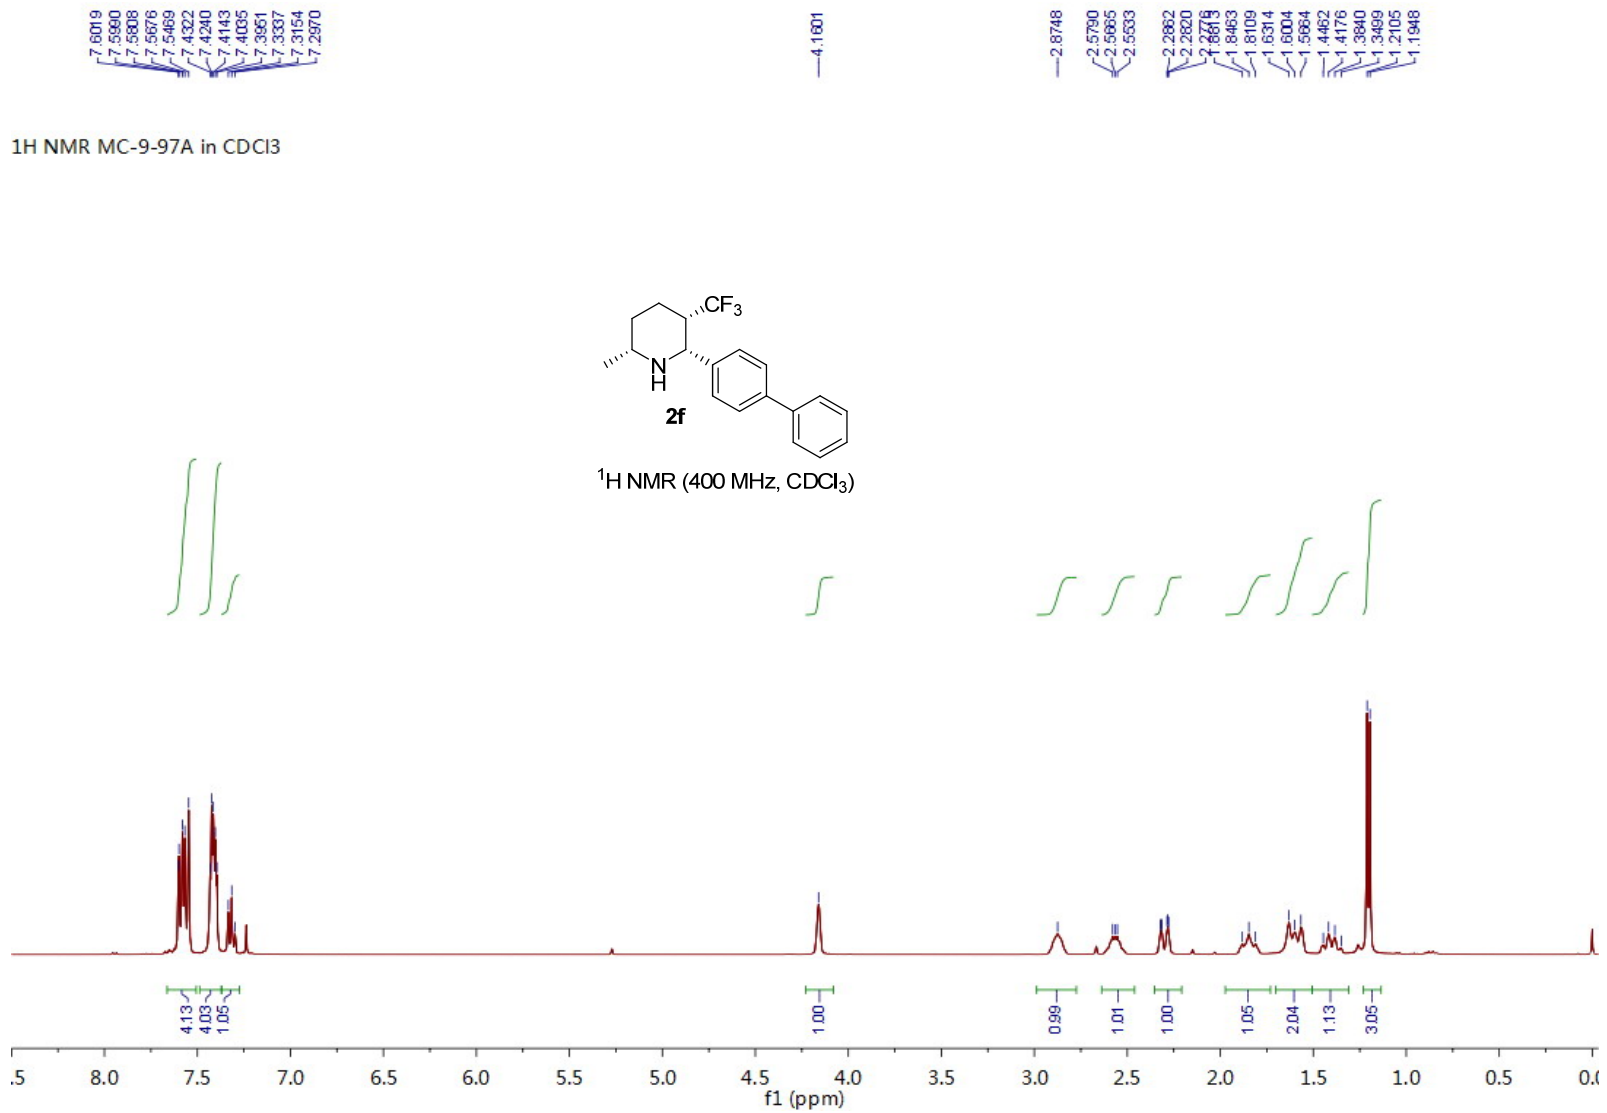

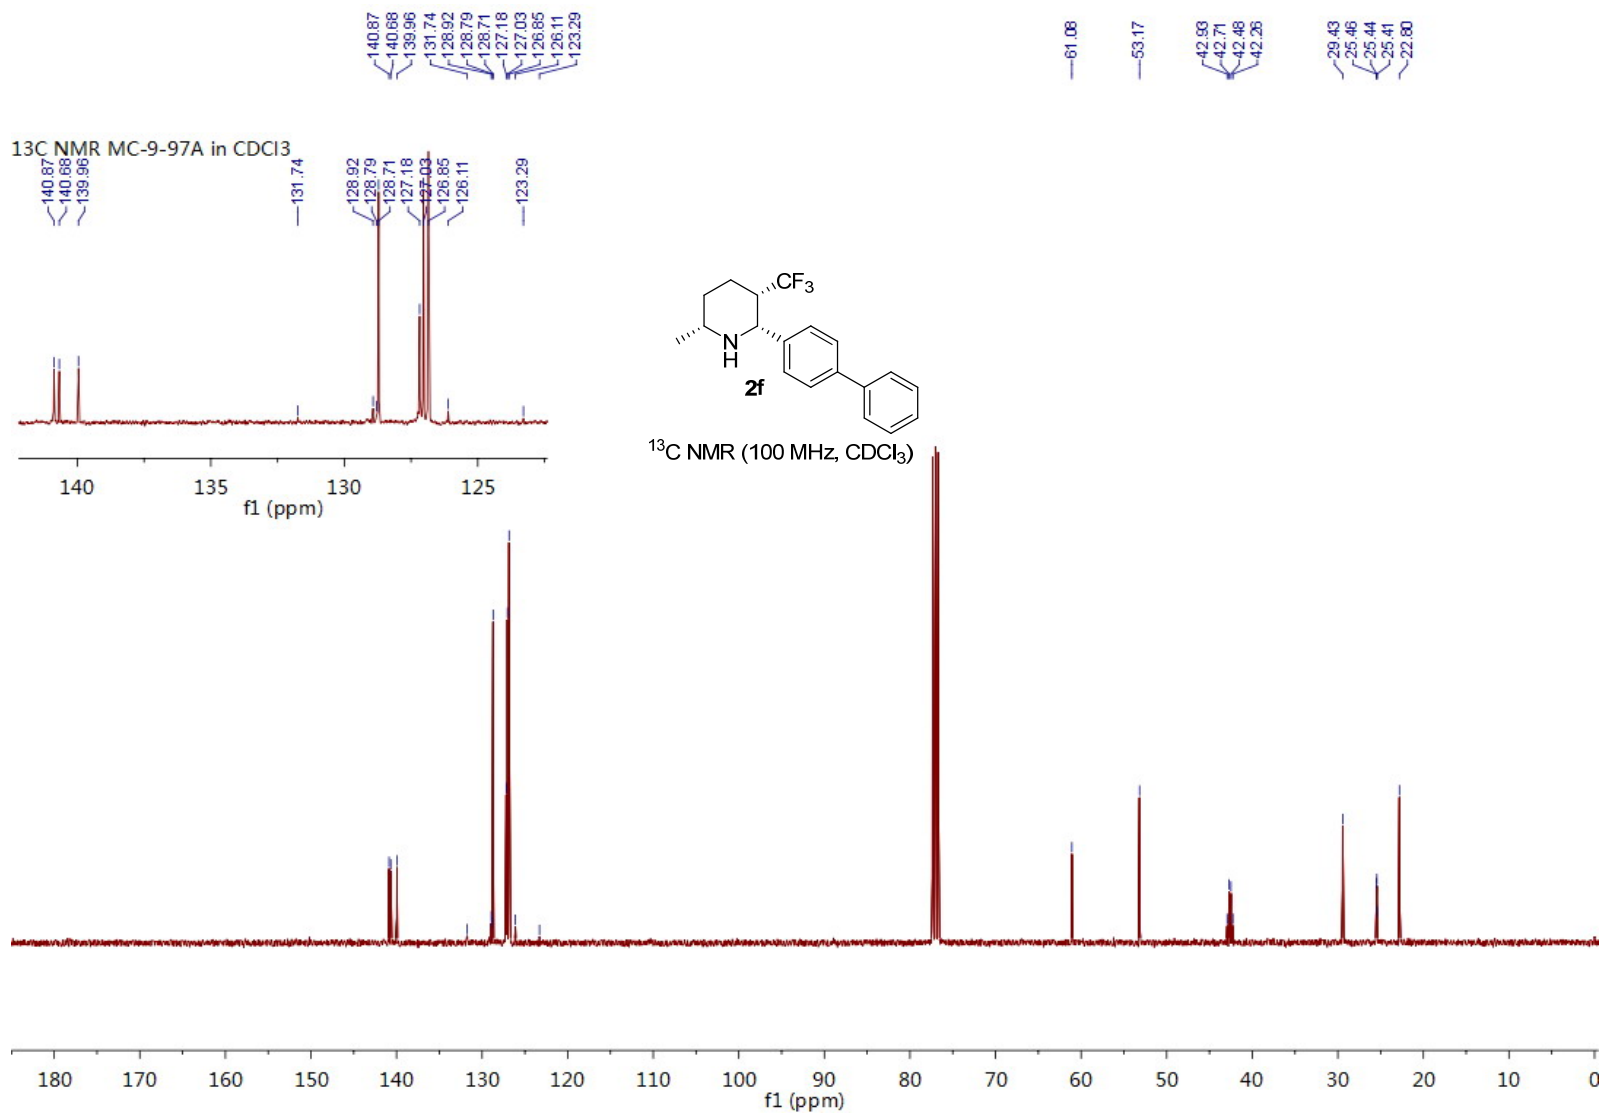

19F NMR MC-9-97A in CDCl3

—59.0770

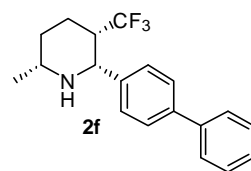

<sup>19</sup>F NMR (376 MHz, CDCl<sub>3</sub>)

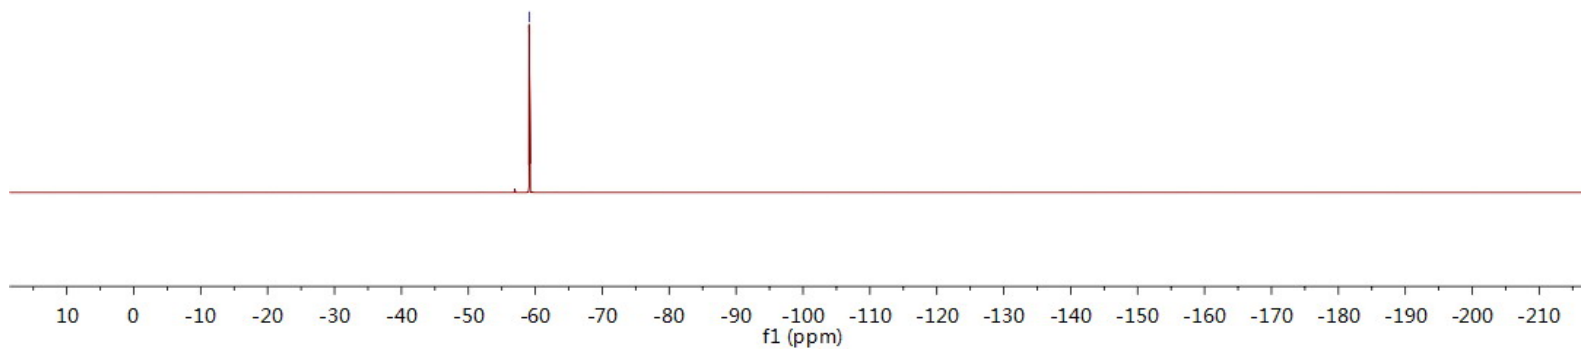

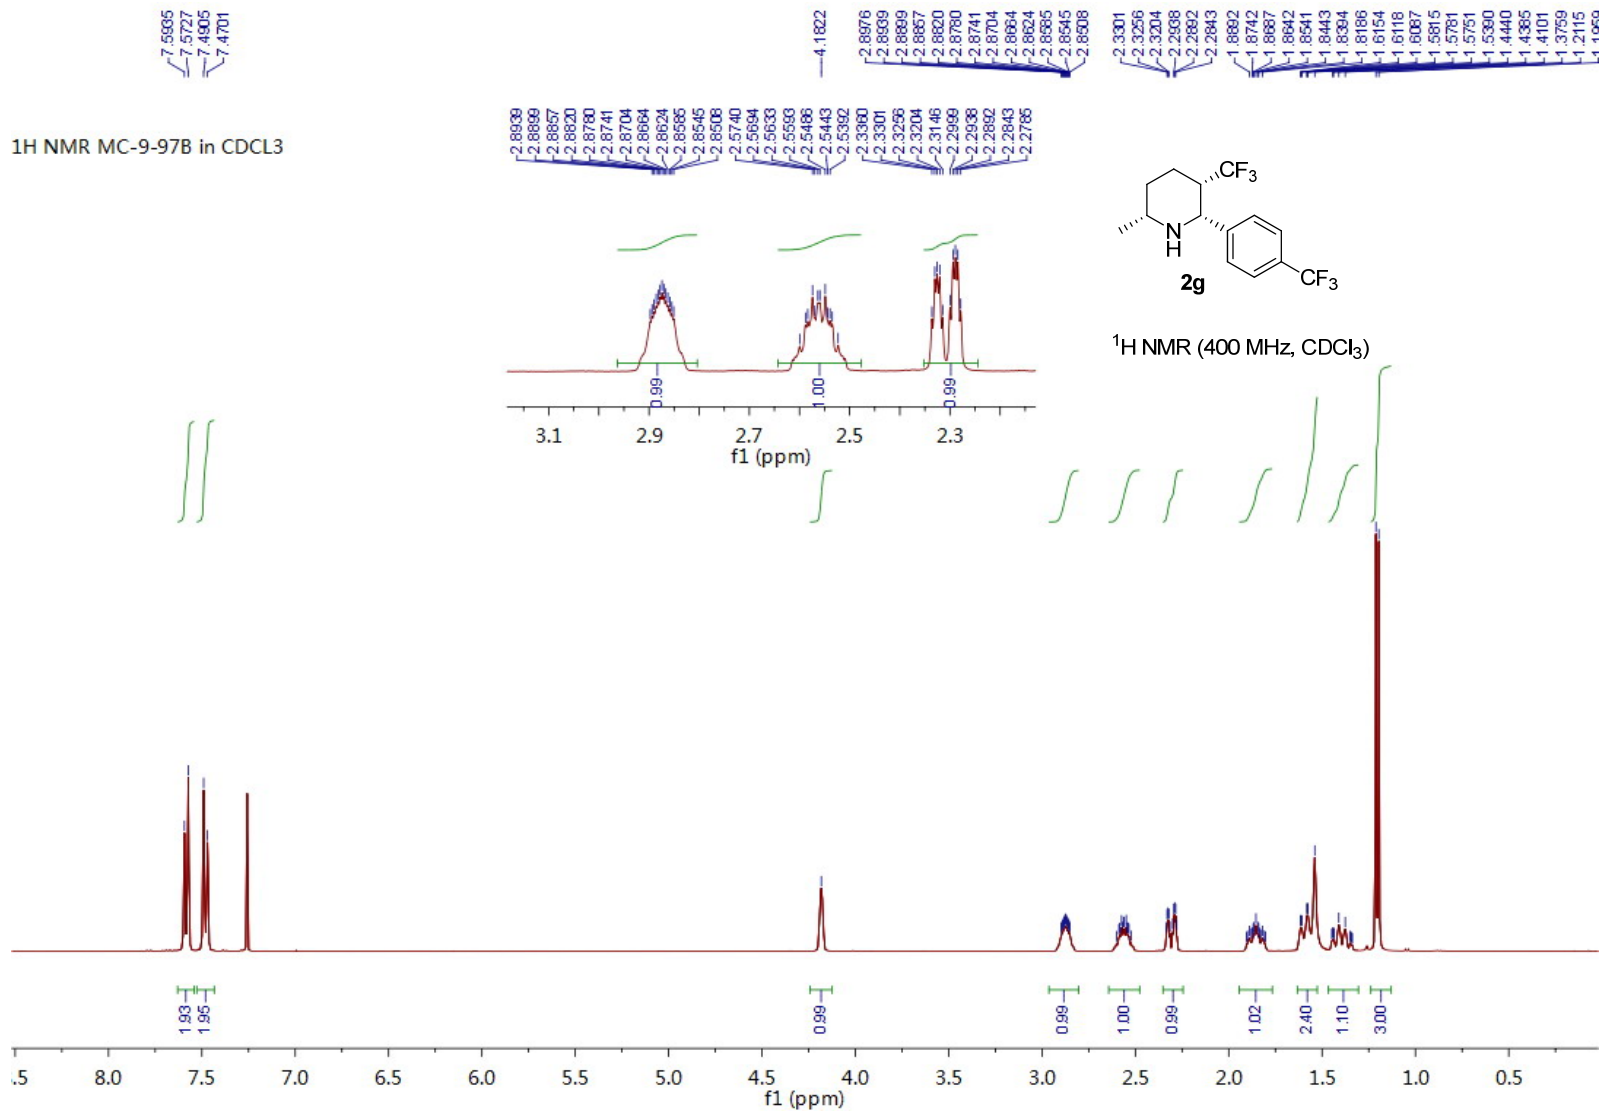



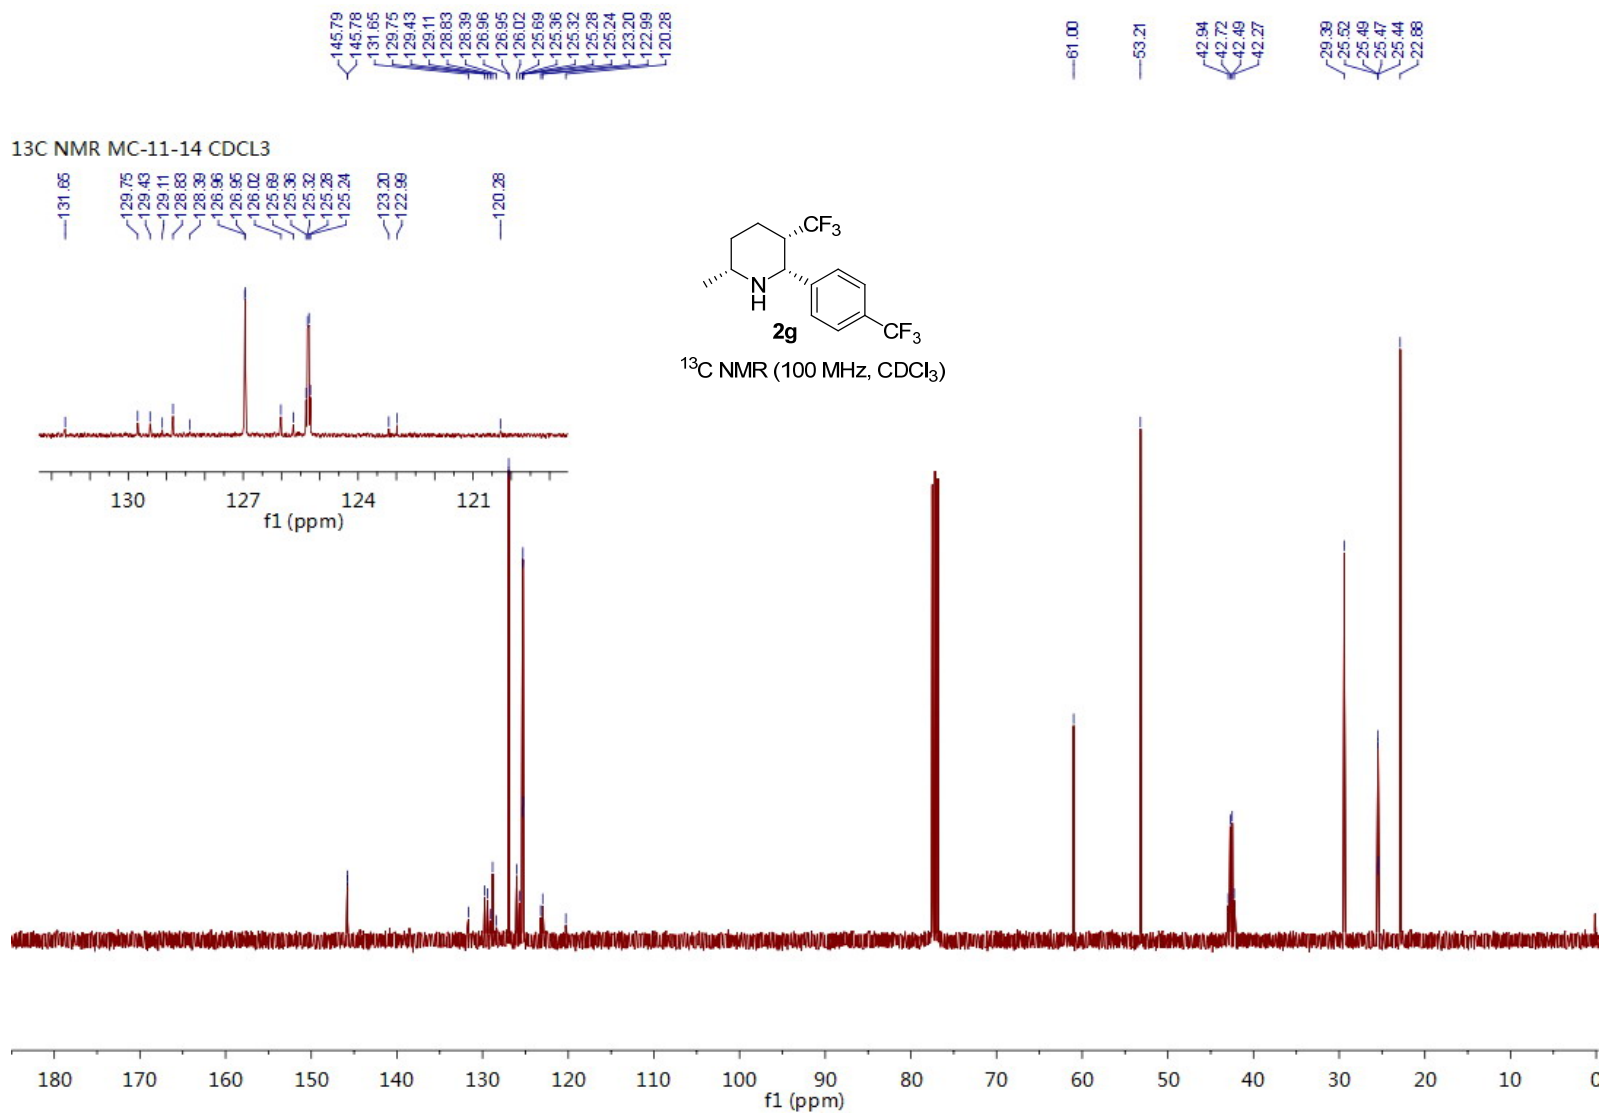

}

-59.2071  
-62.4801

<sup>19</sup>F NMR MC-9-97B in CDCl<sub>3</sub>

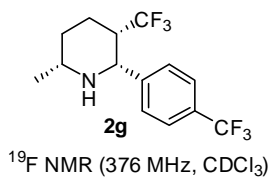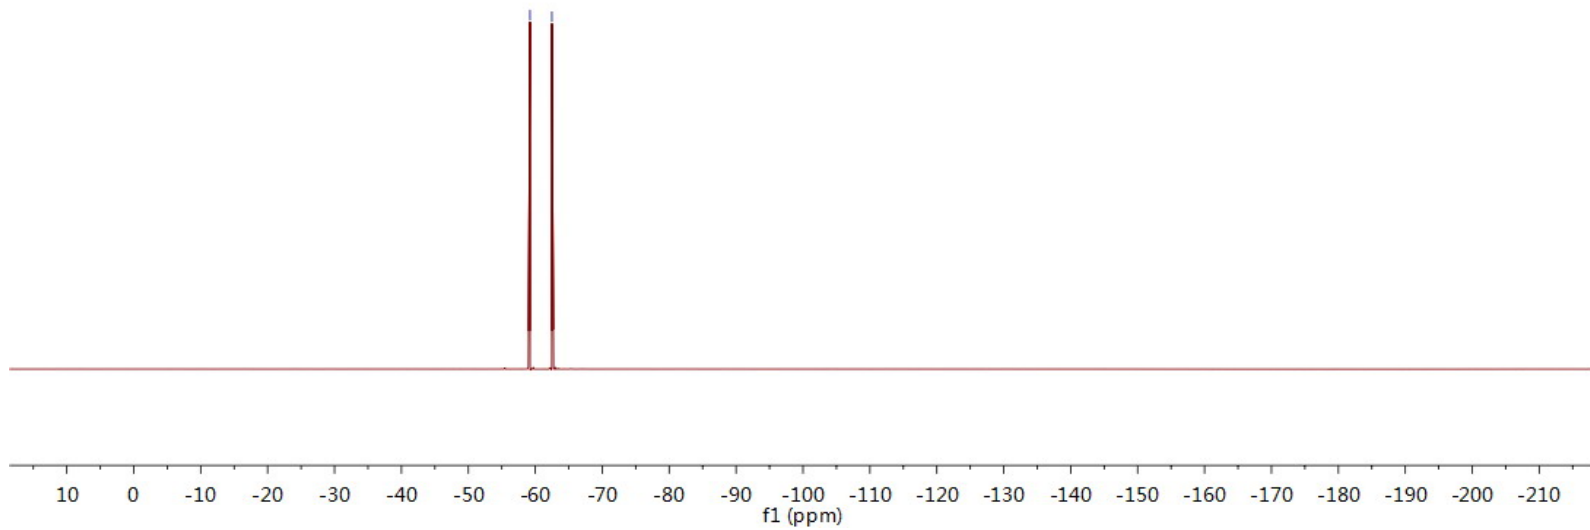

6.9334  
6.9222  
6.9180  
6.9013  
6.8872  
6.8861  
6.8679  
6.7128  
6.7070  
6.7012  
6.6907  
6.6849  
6.6782  
6.6686  
6.6628  
6.6570

4.0967  
4.0938  
2.8716  
2.8678  
2.8638  
2.8598  
2.8560  
2.8521  
2.8482  
2.8443  
2.8404  
2.8366  
2.8325  
2.8285  
2.8246  
2.8206  
2.8166  
2.8125  
2.8085  
2.8044  
2.8004  
2.7963  
2.7923  
2.7882  
2.7842  
2.7801  
2.7761  
2.7721  
2.7680  
2.7640  
2.7600  
2.7560  
2.7520  
2.7480  
2.7440  
2.7400  
2.7360  
2.7320  
2.7280  
2.7240  
2.7200  
2.7160  
2.7120  
2.7080  
2.7040  
2.7000  
2.6960  
2.6920  
2.6880  
2.6840  
2.6800  
2.6760  
2.6720  
2.6680  
2.6640  
2.6600  
2.6560  
2.6520  
2.6480  
2.6440  
2.6400  
2.6360  
2.6320  
2.6280  
2.6240  
2.6200  
2.6160  
2.6120  
2.6080  
2.6040  
2.6000  
2.5960  
2.5920  
2.5880  
2.5840  
2.5800  
2.5760  
2.5720  
2.5680  
2.5640  
2.5600  
2.5560  
2.5520  
2.5480  
2.5440  
2.5400  
2.5360  
2.5320  
2.5280  
2.5240  
2.5200  
2.5160  
2.5120  
2.5080  
2.5040  
2.5000  
2.4960  
2.4920  
2.4880  
2.4840  
2.4800  
2.4760  
2.4720  
2.4680  
2.4640  
2.4600  
2.4560  
2.4520  
2.4480  
2.4440  
2.4400  
2.4360  
2.4320  
2.4280  
2.4240  
2.4200  
2.4160  
2.4120  
2.4080  
2.4040  
2.4000  
2.3960  
2.3920  
2.3880  
2.3840  
2.3800  
2.3760  
2.3720  
2.3680  
2.3640  
2.3600  
2.3560  
2.3520  
2.3480  
2.3440  
2.3400  
2.3360  
2.3320  
2.3280  
2.3240  
2.3200  
2.3160  
2.3120  
2.3080  
2.3040  
2.3000  
2.2960  
2.2920  
2.2880  
2.2840  
2.2800  
2.2760  
2.2720  
2.2680  
2.2640  
2.2600  
2.2560  
2.2520  
2.2480  
2.2440  
2.2400  
2.2360  
2.2320  
2.2280  
2.2240  
2.2200  
2.2160  
2.2120  
2.2080  
2.2040  
2.2000  
2.1960  
2.1920  
2.1880  
2.1840  
2.1800  
2.1760  
2.1720  
2.1680  
2.1640  
2.1600  
2.1560  
2.1520  
2.1480  
2.1440  
2.1400  
2.1360  
2.1320  
2.1280  
2.1240  
2.1200  
2.1160  
2.1120  
2.1080  
2.1040  
2.1000  
2.0960  
2.0920  
2.0880  
2.0840  
2.0800  
2.0760  
2.0720  
2.0680  
2.0640  
2.0600  
2.0560  
2.0520  
2.0480  
2.0440  
2.0400  
2.0360  
2.0320  
2.0280  
2.0240  
2.0200  
2.0160  
2.0120  
2.0080  
2.0040  
2.0000  
1.9960  
1.9920  
1.9880  
1.9840  
1.9800  
1.9760  
1.9720  
1.9680  
1.9640  
1.9600  
1.9560  
1.9520  
1.9480  
1.9440  
1.9400  
1.9360  
1.9320  
1.9280  
1.9240  
1.9200  
1.9160  
1.9120  
1.9080  
1.9040  
1.9000  
1.8960  
1.8920  
1.8880  
1.8840  
1.8800  
1.8760  
1.8720  
1.8680  
1.8640  
1.8600  
1.8560  
1.8520  
1.8480  
1.8440  
1.8400  
1.8360  
1.8320  
1.8280  
1.8240  
1.8200  
1.8160  
1.8120  
1.8080  
1.8040  
1.8000  
1.7960  
1.7920  
1.7880  
1.7840  
1.7800  
1.7760  
1.7720  
1.7680  
1.7640  
1.7600  
1.7560  
1.7520  
1.7480  
1.7440  
1.7400  
1.7360  
1.7320  
1.7280  
1.7240  
1.7200  
1.7160  
1.7120  
1.7080  
1.7040  
1.7000  
1.6960  
1.6920  
1.6880  
1.6840  
1.6800  
1.6760  
1.6720  
1.6680  
1.6640  
1.6600  
1.6560  
1.6520  
1.6480  
1.6440  
1.6400  
1.6360  
1.6320  
1.6280  
1.6240  
1.6200  
1.6160  
1.6120  
1.6080  
1.6040  
1.6000  
1.5960  
1.5920  
1.5880  
1.5840  
1.5800  
1.5760  
1.5720  
1.5680  
1.5640  
1.5600  
1.5560  
1.5520  
1.5480  
1.5440  
1.5400  
1.5360  
1.5320  
1.5280  
1.5240  
1.5200  
1.5160  
1.5120  
1.5080  
1.5040  
1.5000  
1.4960  
1.4920  
1.4880  
1.4840  
1.4800  
1.4760  
1.4720  
1.4680  
1.4640  
1.4600  
1.4560  
1.4520  
1.4480  
1.4440  
1.4400  
1.4360  
1.4320  
1.4280  
1.4240  
1.4200  
1.4160  
1.4120  
1.4080  
1.4040  
1.4000  
1.3960  
1.3920  
1.3880  
1.3840  
1.3800  
1.3760  
1.3720  
1.3680  
1.3640  
1.3600  
1.3560  
1.3520  
1.3480  
1.3440  
1.3400  
1.3360  
1.3320  
1.3280  
1.3240  
1.3200  
1.3160  
1.3120  
1.3080  
1.3040  
1.3000  
1.2960  
1.2920  
1.2880  
1.2840  
1.2800  
1.2760  
1.2720  
1.2680  
1.2640  
1.2600  
1.2560  
1.2520  
1.2480  
1.2440  
1.2400  
1.2360  
1.2320  
1.2280  
1.2240  
1.2200  
1.2160  
1.2120  
1.2080  
1.2040  
1.2000  
1.1960  
1.1920  
1.1880  
1.1840  
1.1800  
1.1760  
1.1720  
1.1680  
1.1640  
1.1600  
1.1560  
1.1520  
1.1480  
1.1440  
1.1400  
1.1360  
1.1320  
1.1280  
1.1240  
1.1200  
1.1160  
1.1120  
1.1080  
1.1040  
1.1000  
1.0960  
1.0920  
1.0880  
1.0840  
1.0800  
1.0760  
1.0720  
1.0680  
1.0640  
1.0600  
1.0560  
1.0520  
1.0480  
1.0440  
1.0400  
1.0360  
1.0320  
1.0280  
1.0240  
1.0200  
1.0160  
1.0120  
1.0080  
1.0040  
1.0000  
0.9960  
0.9920  
0.9880  
0.9840  
0.9800  
0.9760  
0.9720  
0.9680  
0.9640  
0.9600  
0.9560  
0.9520  
0.9480  
0.9440  
0.9400  
0.9360  
0.9320  
0.9280  
0.9240  
0.9200  
0.9160  
0.9120  
0.9080  
0.9040  
0.9000  
0.8960  
0.8920  
0.8880  
0.8840  
0.8800  
0.8760  
0.8720  
0.8680  
0.8640  
0.8600  
0.8560  
0.8520  
0.8480  
0.8440  
0.8400  
0.8360  
0.8320  
0.8280  
0.8240  
0.8200  
0.8160  
0.8120  
0.8080  
0.8040  
0.8000  
0.7960  
0.7920  
0.7880  
0.7840  
0.7800  
0.7760  
0.7720  
0.7680  
0.7640  
0.7600  
0.7560  
0.7520  
0.7480  
0.7440  
0.7400  
0.7360  
0.7320  
0.7280  
0.7240  
0.7200  
0.7160  
0.7120  
0.7080  
0.7040  
0.7000  
0.6960  
0.6920  
0.6880  
0.6840  
0.6800  
0.6760  
0.6720  
0.6680  
0.6640  
0.6600  
0.6560  
0.6520  
0.6480  
0.6440  
0.6400  
0.6360  
0.6320  
0.6280  
0.6240  
0.6200  
0.6160  
0.6120  
0.6080  
0.6040  
0.6000  
0.5960  
0.5920  
0.5880  
0.5840  
0.5800  
0.5760  
0.5720  
0.5680  
0.5640  
0.5600  
0.5560  
0.5520  
0.5480  
0.5440  
0.5400  
0.5360  
0.5320  
0.5280  
0.5240  
0.5200  
0.5160  
0.5120  
0.5080  
0.5040  
0.5000  
0.4960  
0.4920  
0.4880  
0.4840  
0.4800  
0.4760  
0.4720  
0.4680  
0.4640  
0.4600  
0.4560  
0.4520  
0.4480  
0.4440  
0.4400  
0.4360  
0.4320  
0.4280  
0.4240  
0.4200  
0.4160  
0.4120  
0.4080  
0.4040  
0.4000  
0.3960  
0.3920  
0.3880  
0.3840  
0.3800  
0.3760  
0.3720  
0.3680  
0.3640  
0.3600  
0.3560  
0.3520  
0.3480  
0.3440  
0.3400  
0.3360  
0.3320  
0.3280  
0.3240  
0.3200  
0.3160  
0.3120  
0.3080  
0.3040  
0.3000  
0.2960  
0.2920  
0.2880  
0.2840  
0.2800  
0.2760  
0.2720  
0.2680  
0.2640  
0.2600  
0.2560  
0.2520  
0.2480  
0.2440  
0.2400  
0.2360  
0.2320  
0.2280  
0.2240  
0.2200  
0.2160  
0.2120  
0.2080  
0.2040  
0.2000  
0.1960  
0.1920  
0.1880  
0.1840  
0.1800  
0.1760  
0.1720  
0.1680  
0.1640  
0.1600  
0.1560  
0.1520  
0.1480  
0.1440  
0.1400  
0.1360  
0.1320  
0.1280  
0.1240  
0.1200  
0.1160  
0.1120  
0.1080  
0.1040  
0.1000  
0.0960  
0.0920  
0.0880  
0.0840  
0.0800  
0.0760  
0.0720  
0.0680  
0.0640  
0.0600  
0.0560  
0.0520  
0.0480  
0.0440  
0.0400  
0.0360  
0.0320  
0.0280  
0.0240  
0.0200  
0.0160  
0.0120  
0.0080  
0.0040  
0.0000

<sup>1</sup>H NMR MC-9-98A in CDCl<sub>3</sub>

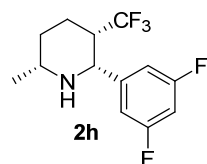

<sup>1</sup>H NMR (400 MHz, CDCl<sub>3</sub>)

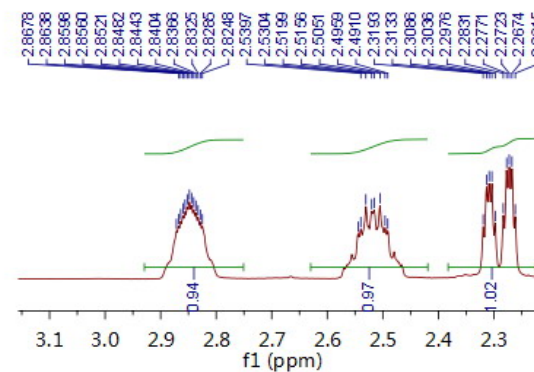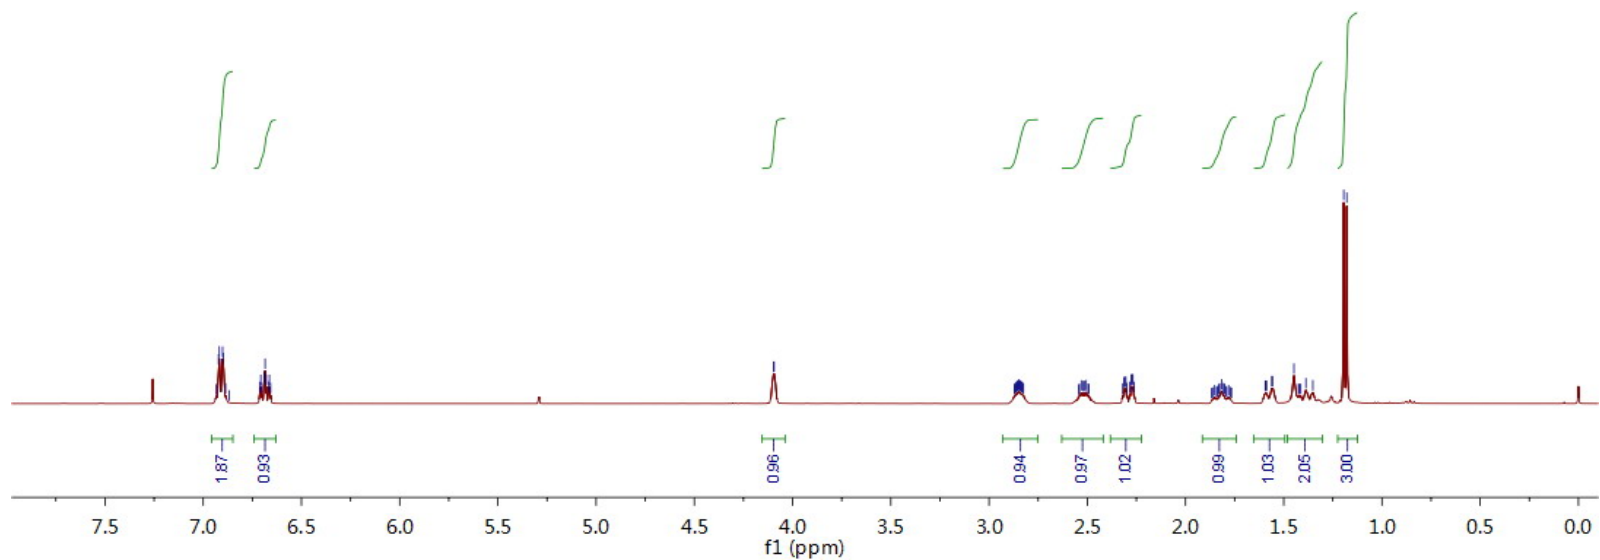

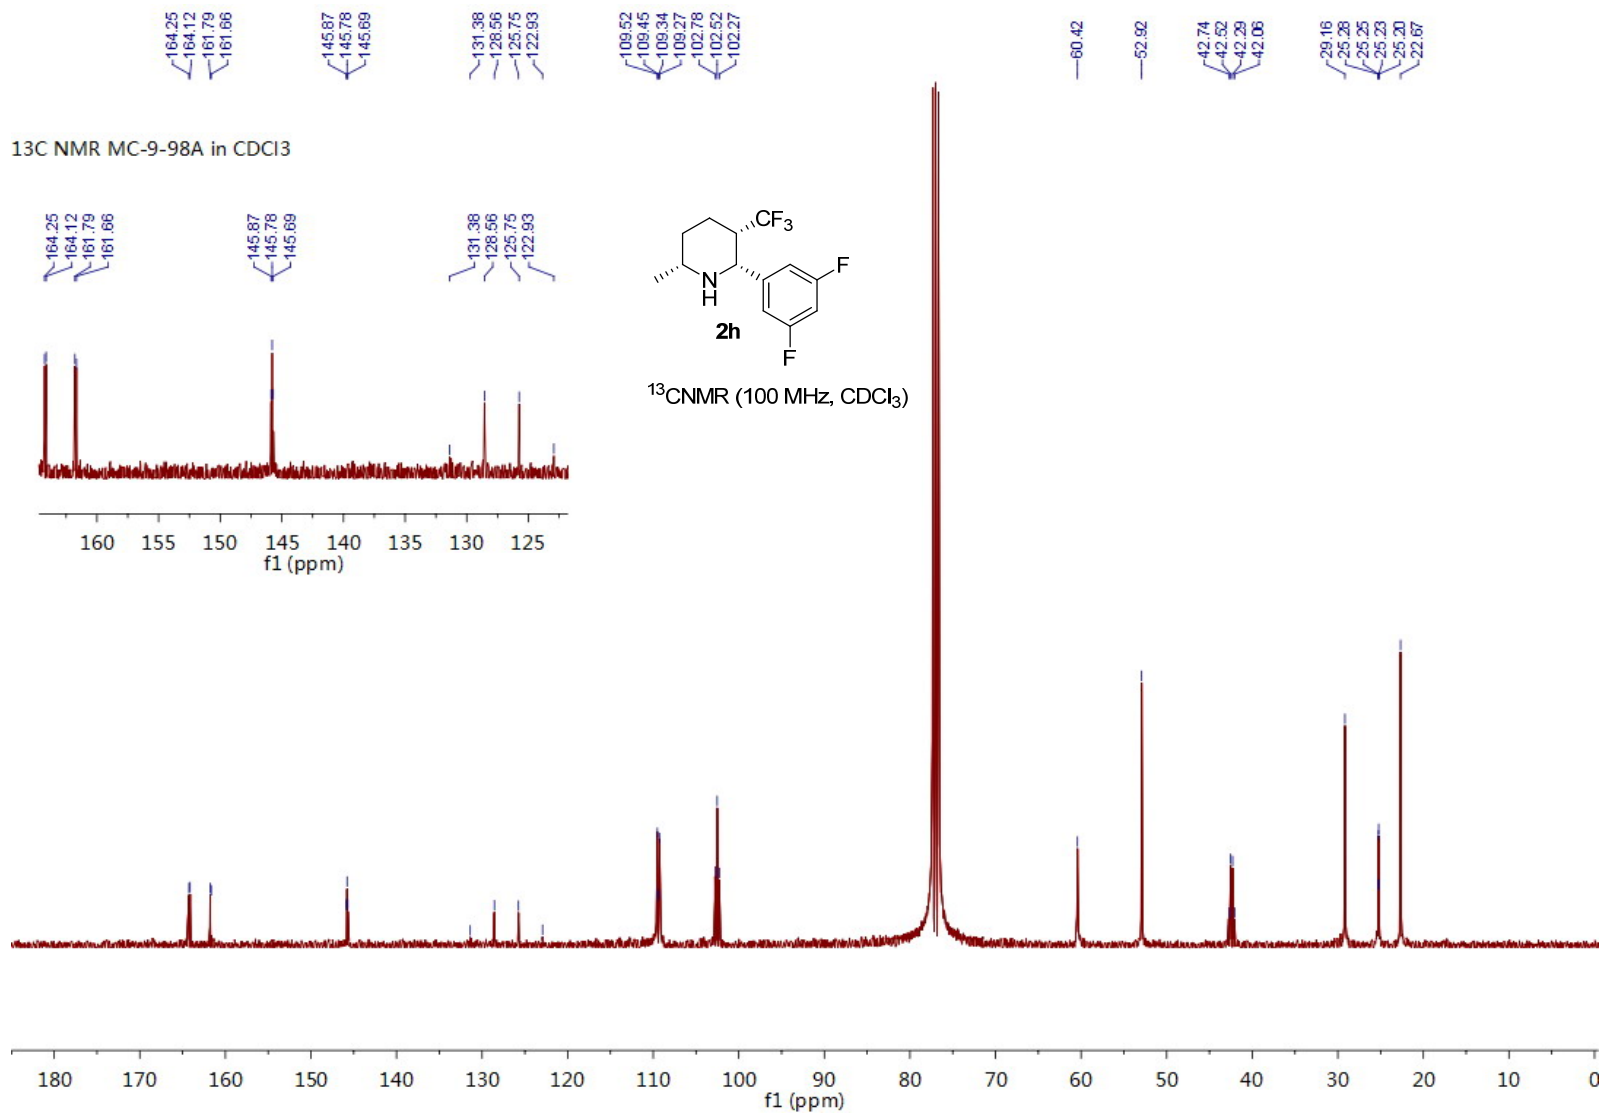

<sup>19</sup>F NMR MC-9-98A in CDCl<sub>3</sub>

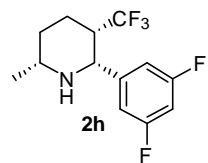

<sup>19</sup>F NMR (376 MHz, CDCl<sub>3</sub>)

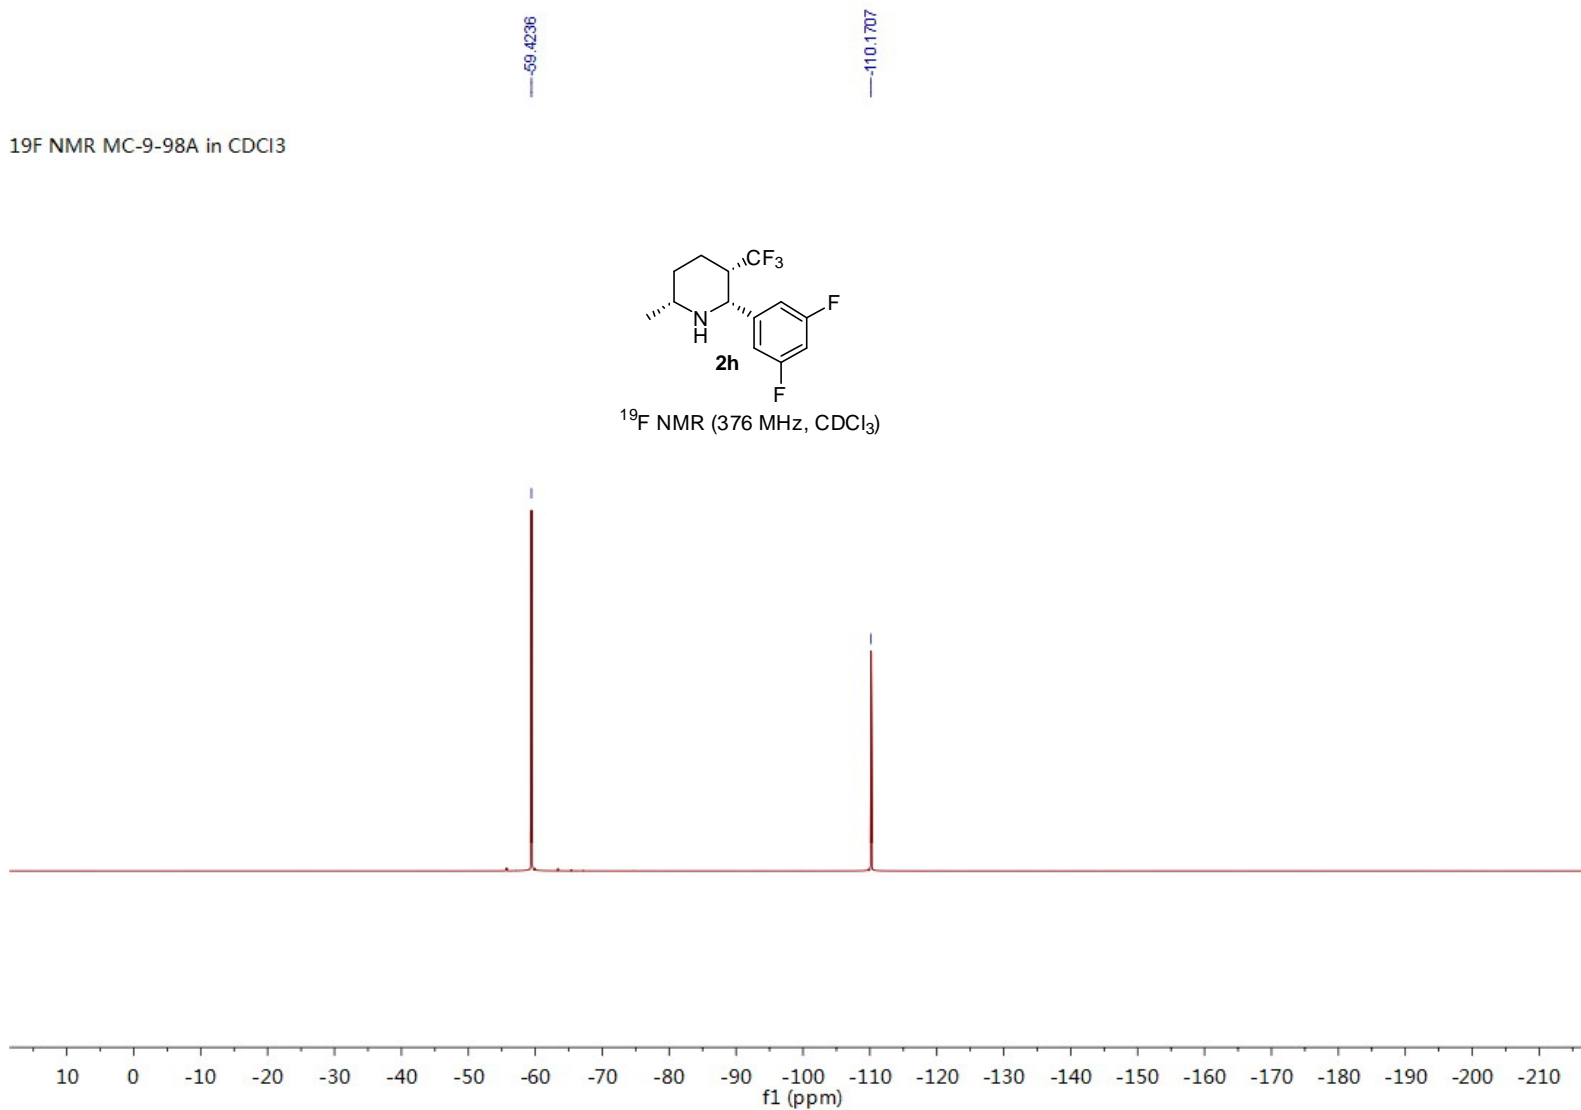

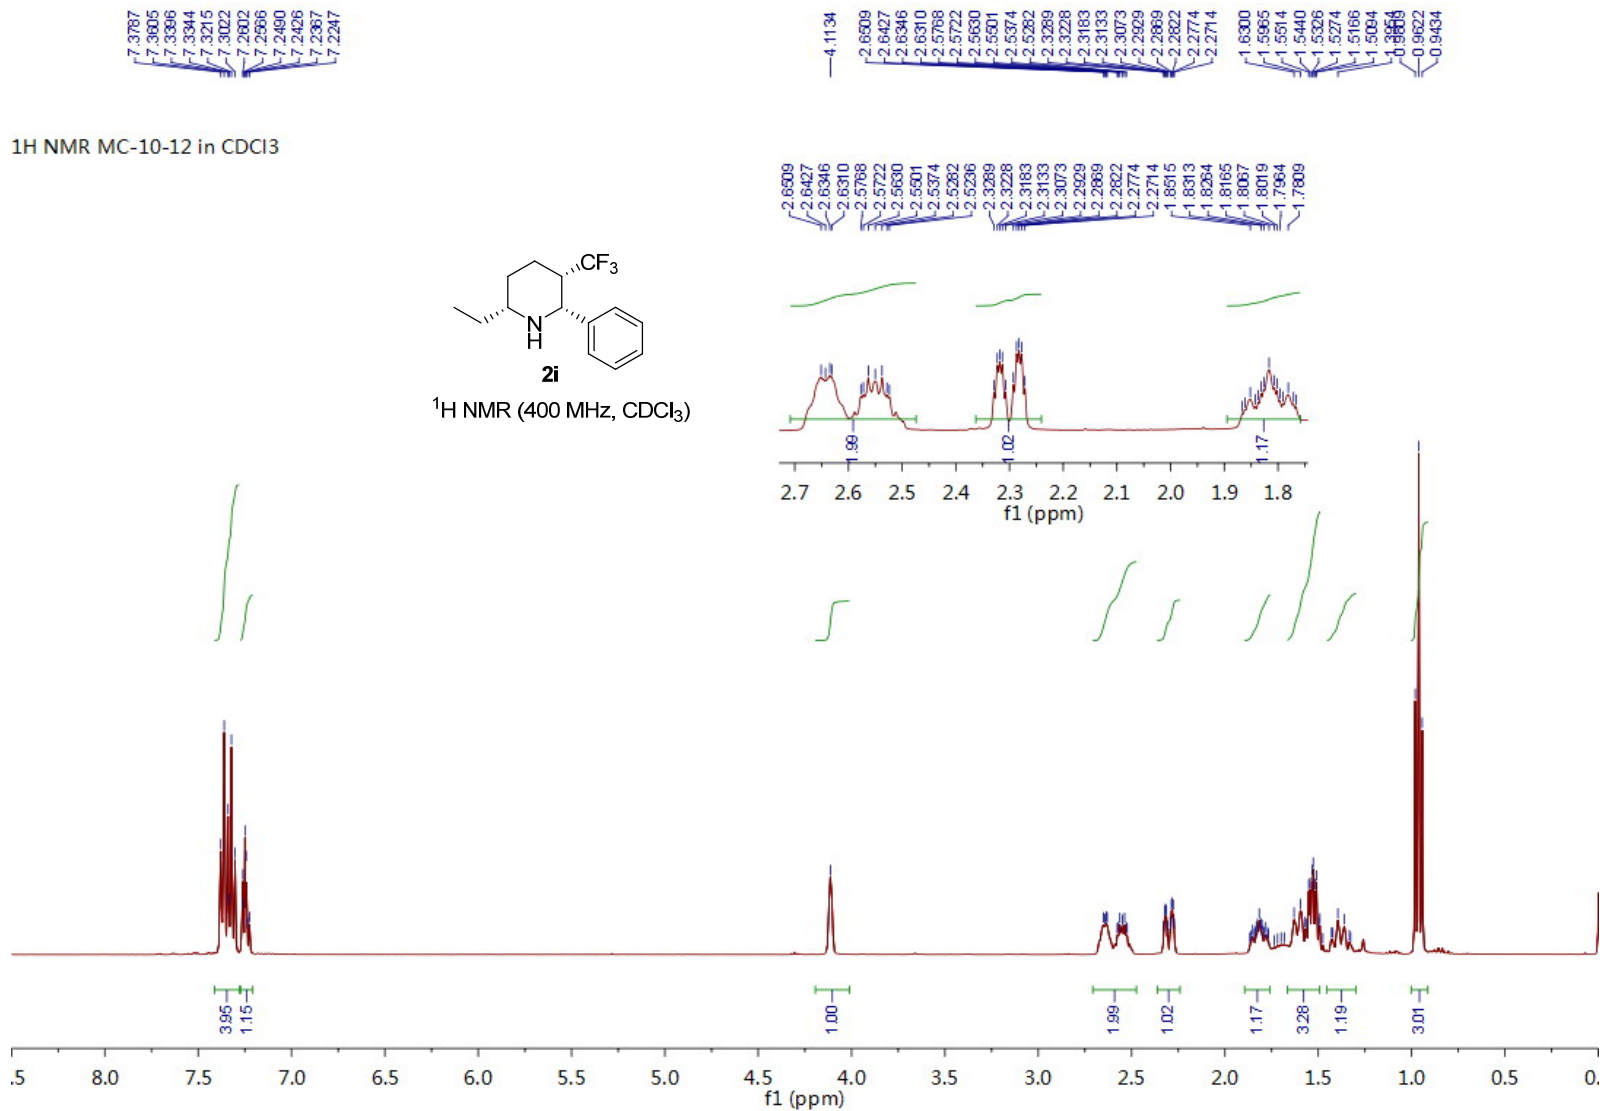

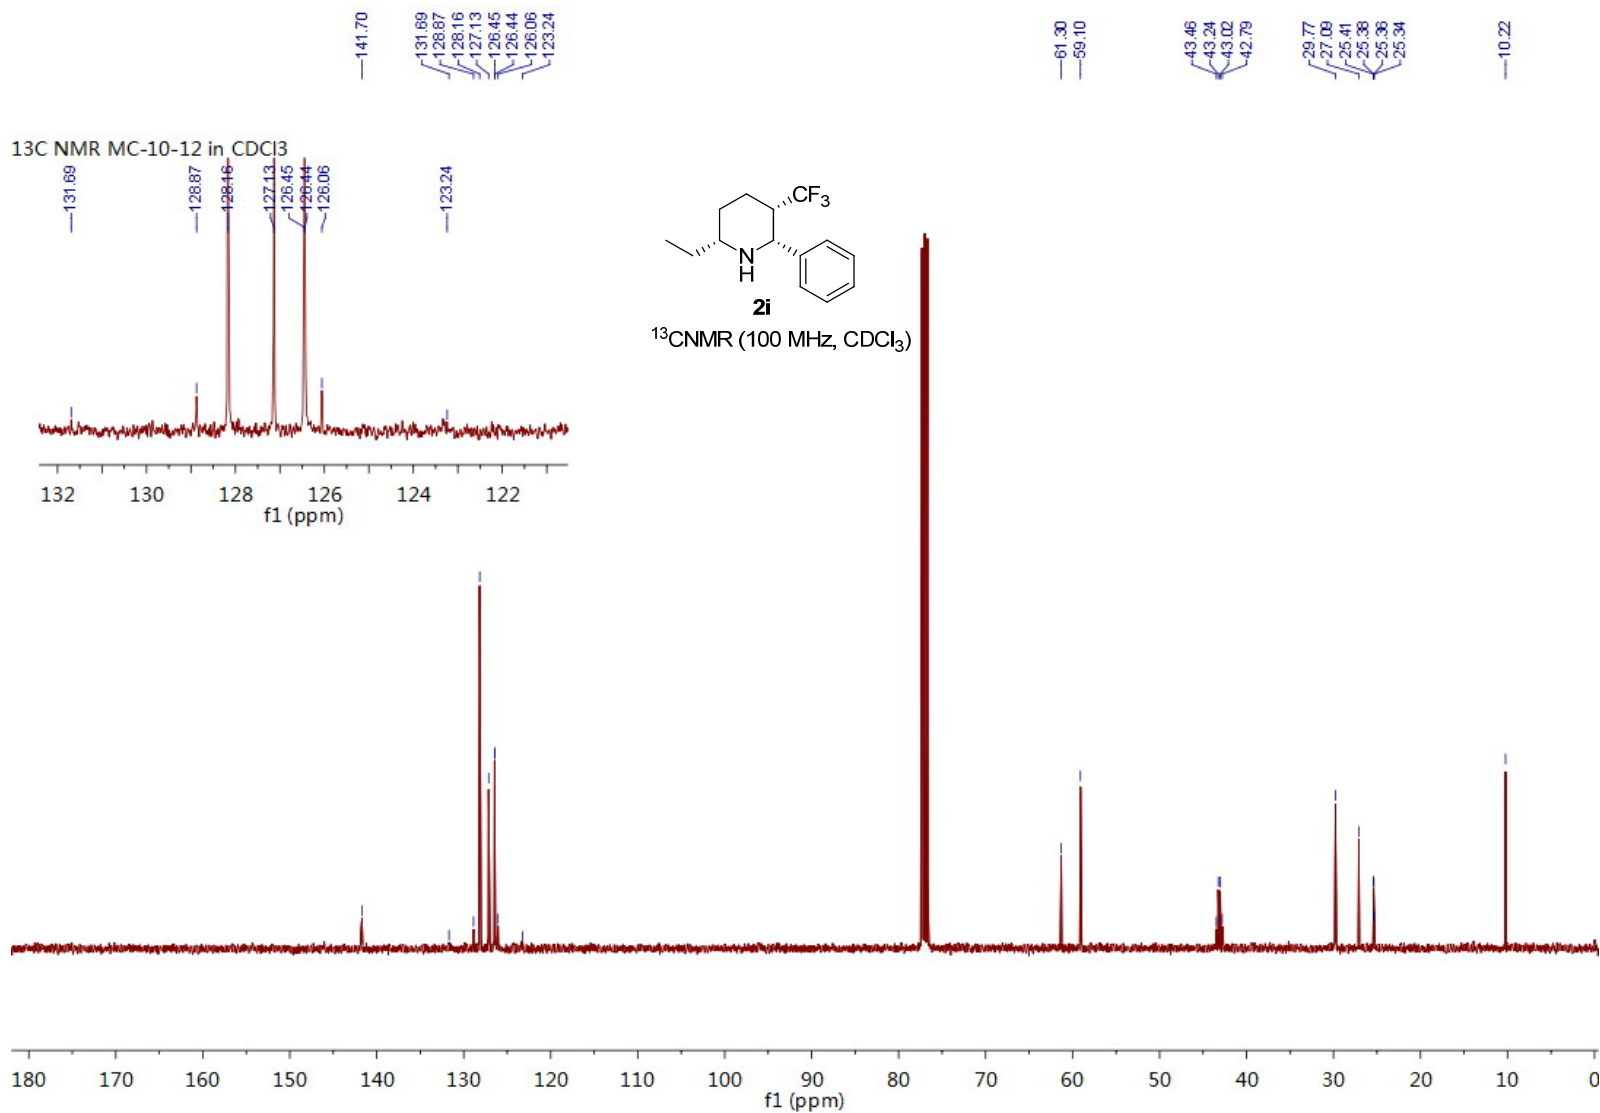

19F NMR MC-10-12 in CDCl3

1827.69

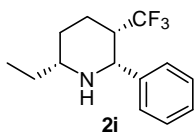

<sup>19</sup>F NMR (376 MHz, CDCl<sub>3</sub>)

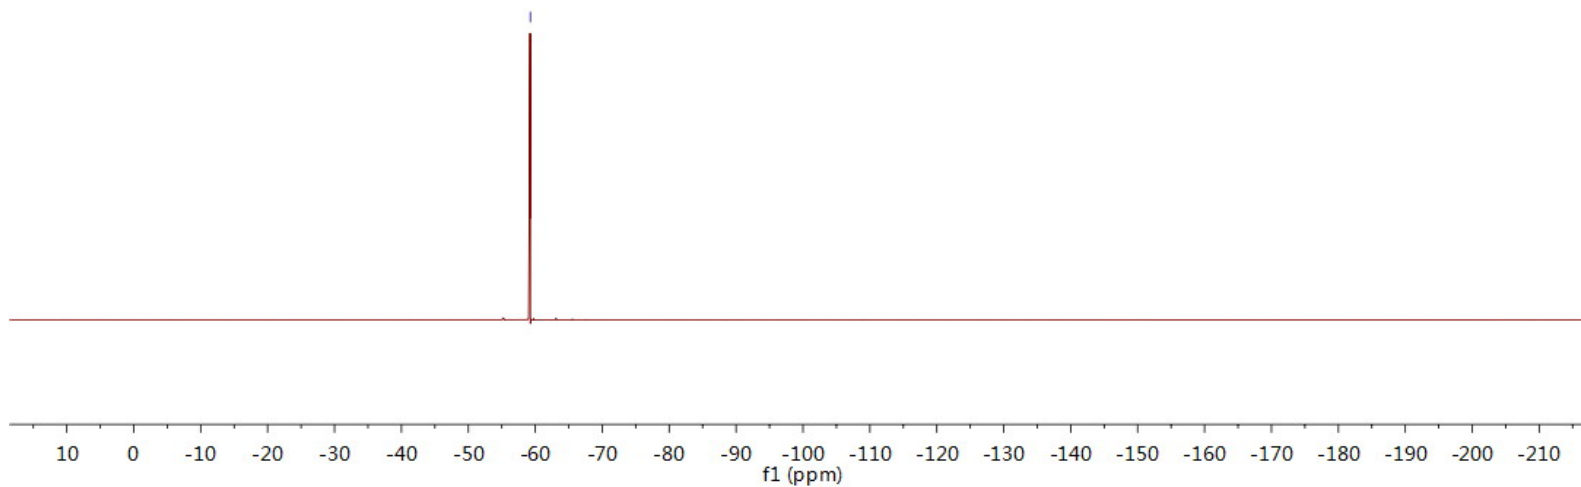



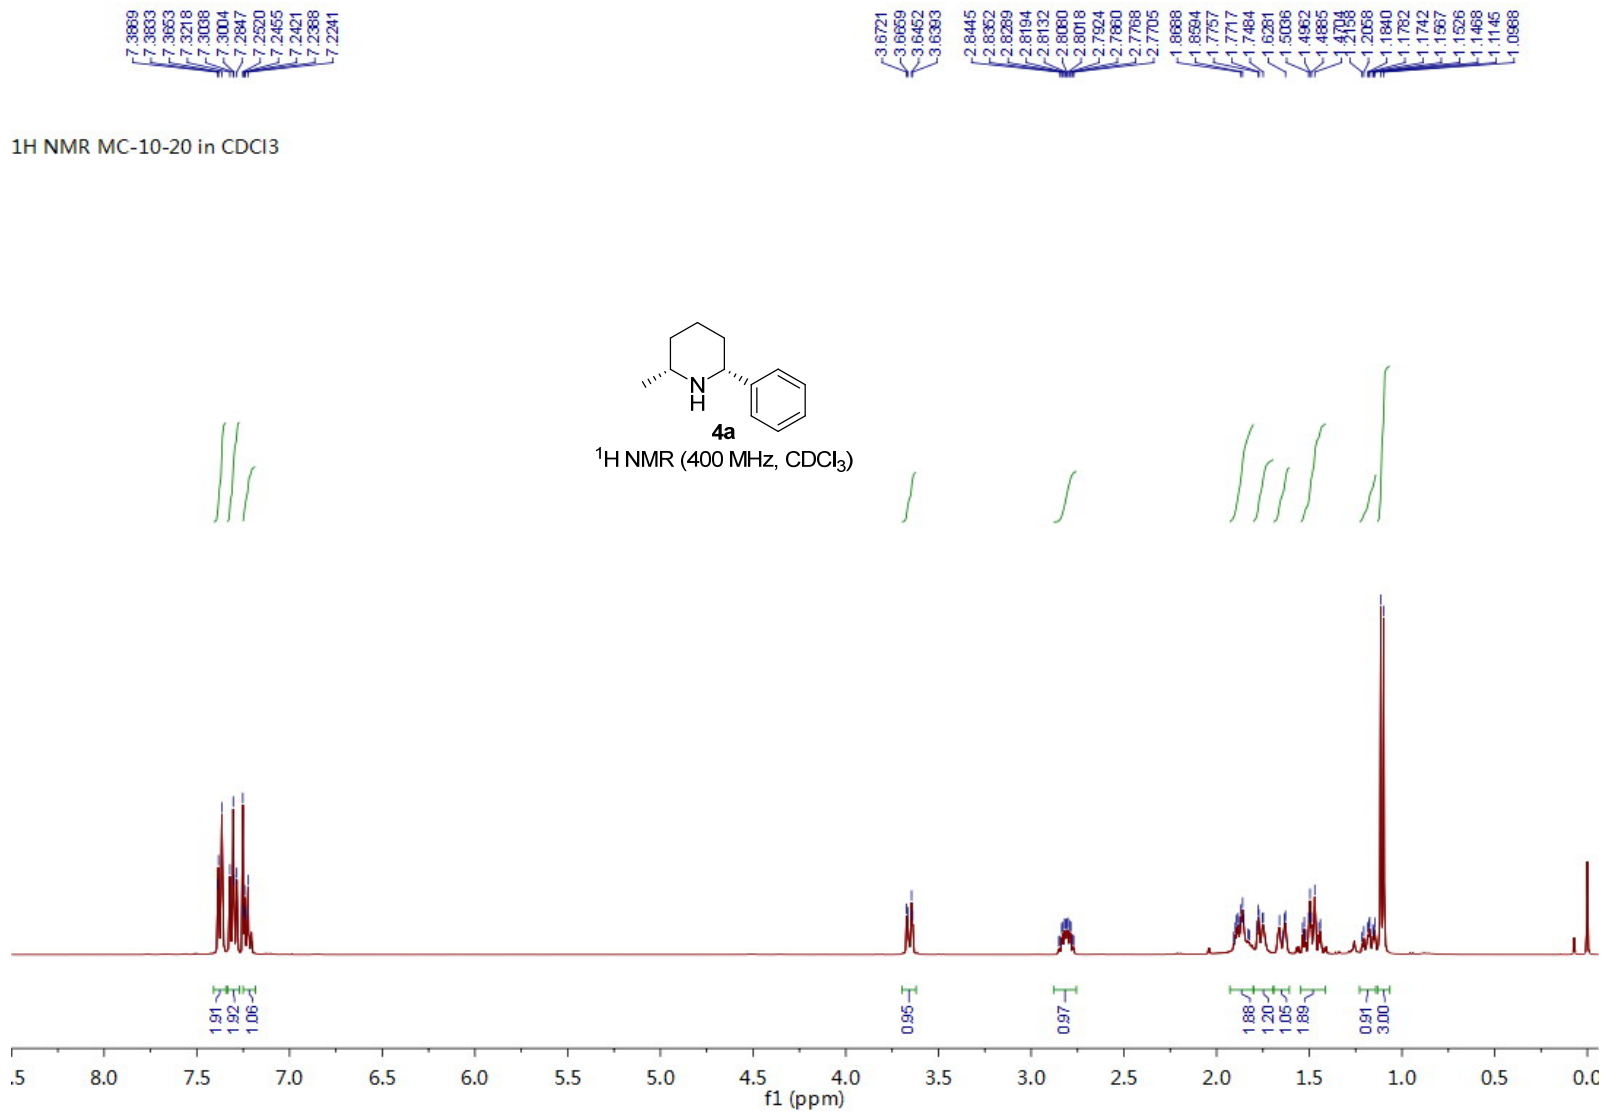

<sup>13</sup>C NMR ZY-6-92A in DMSO

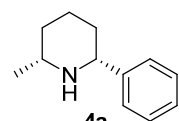

<sup>13</sup>C NMR (100 MHz, CDCl<sub>3</sub>)

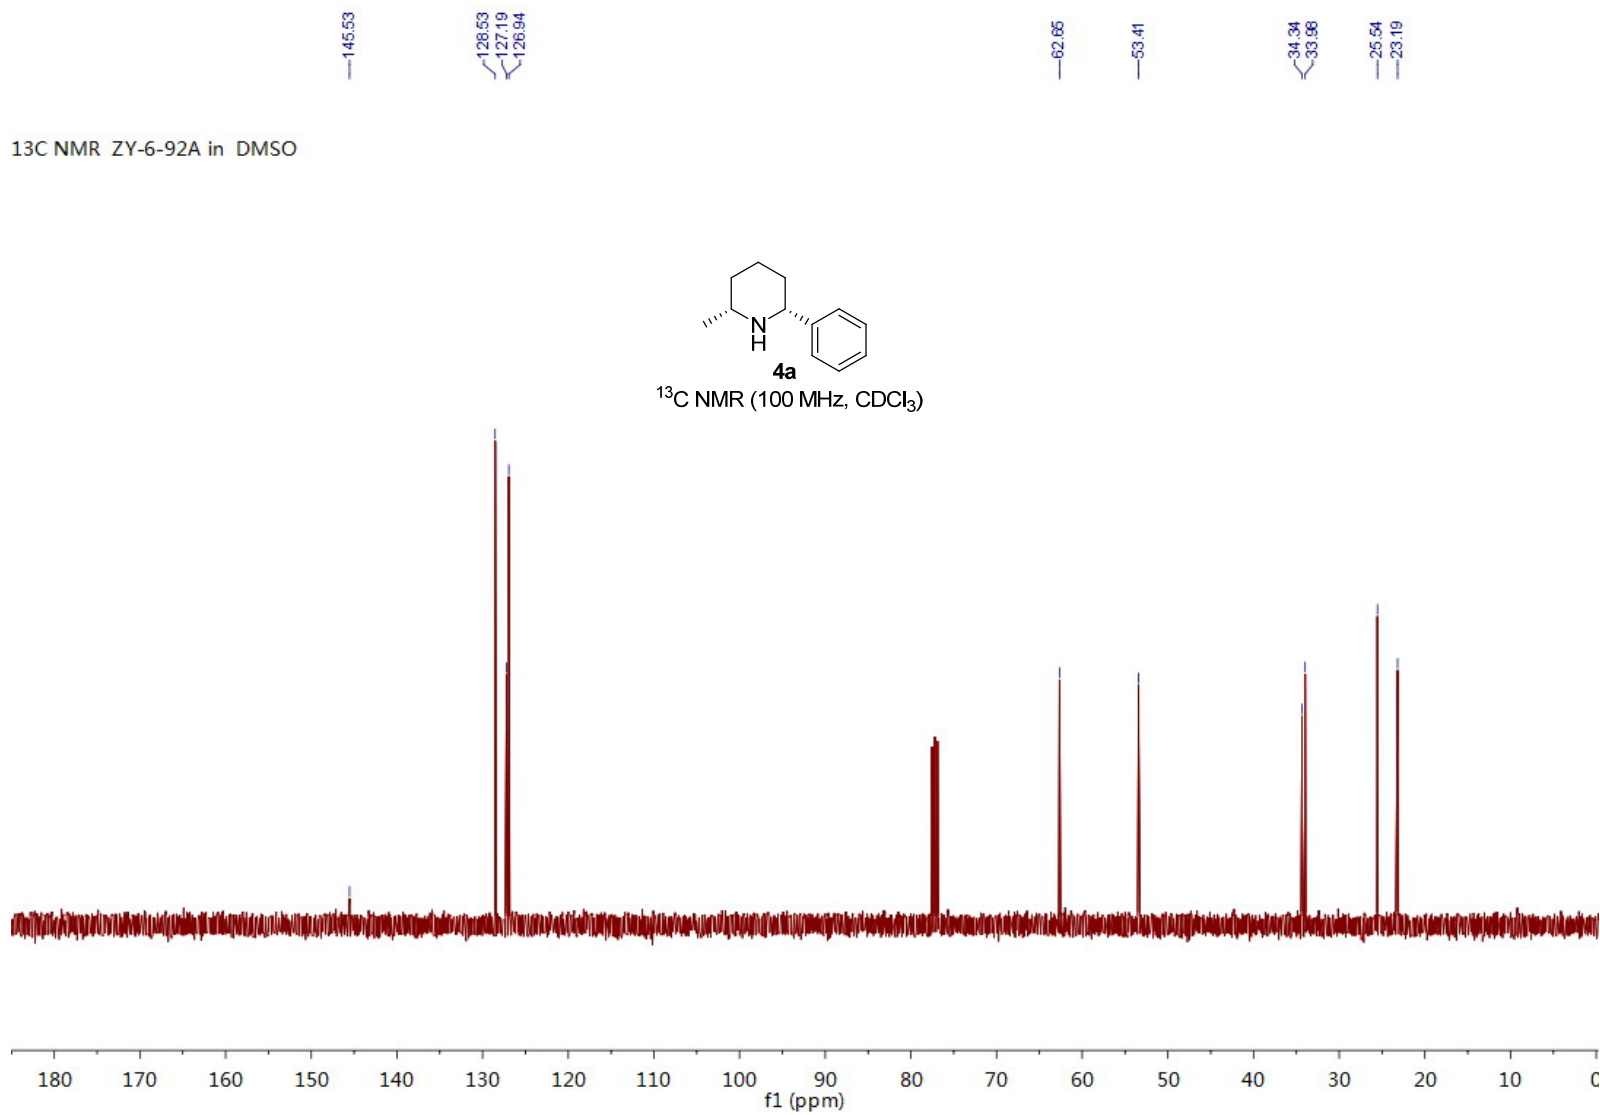

7.5729  
7.5521  
7.5064  
7.4879

3.7427  
3.7365  
3.7149  
3.7037  
2.8598  
2.8540  
2.8445  
2.8384  
2.8286  
2.8228  
2.8173  
2.8115  
2.8017  
2.7866  
2.7662  
2.7801  
1.9021  
1.8932  
1.8770  
1.8697  
1.8624  
1.7741  
1.7461  
1.7383  
1.8627  
1.8782  
1.6513  
1.6461  
1.5349  
1.5025  
1.4313  
1.4255  
1.4225  
1.2266  
1.2089  
1.1880  
1.1765  
1.1467  
1.1254  
1.1190

<sup>1</sup>H NMR ZY-6-94B in CDCl<sub>3</sub>

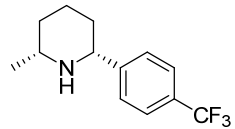

<sup>1</sup>H NMR (400 MHz, CDCl<sub>3</sub>)

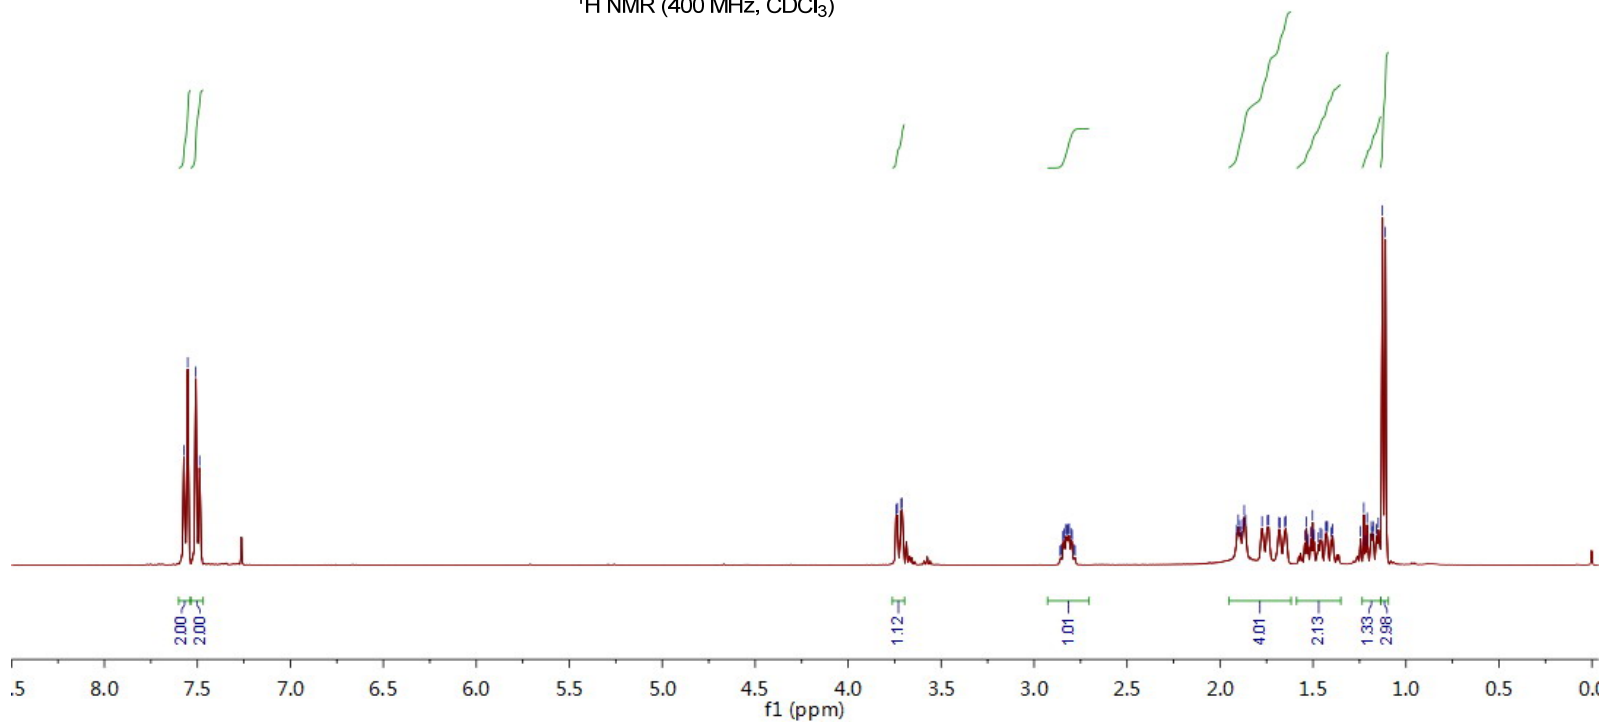

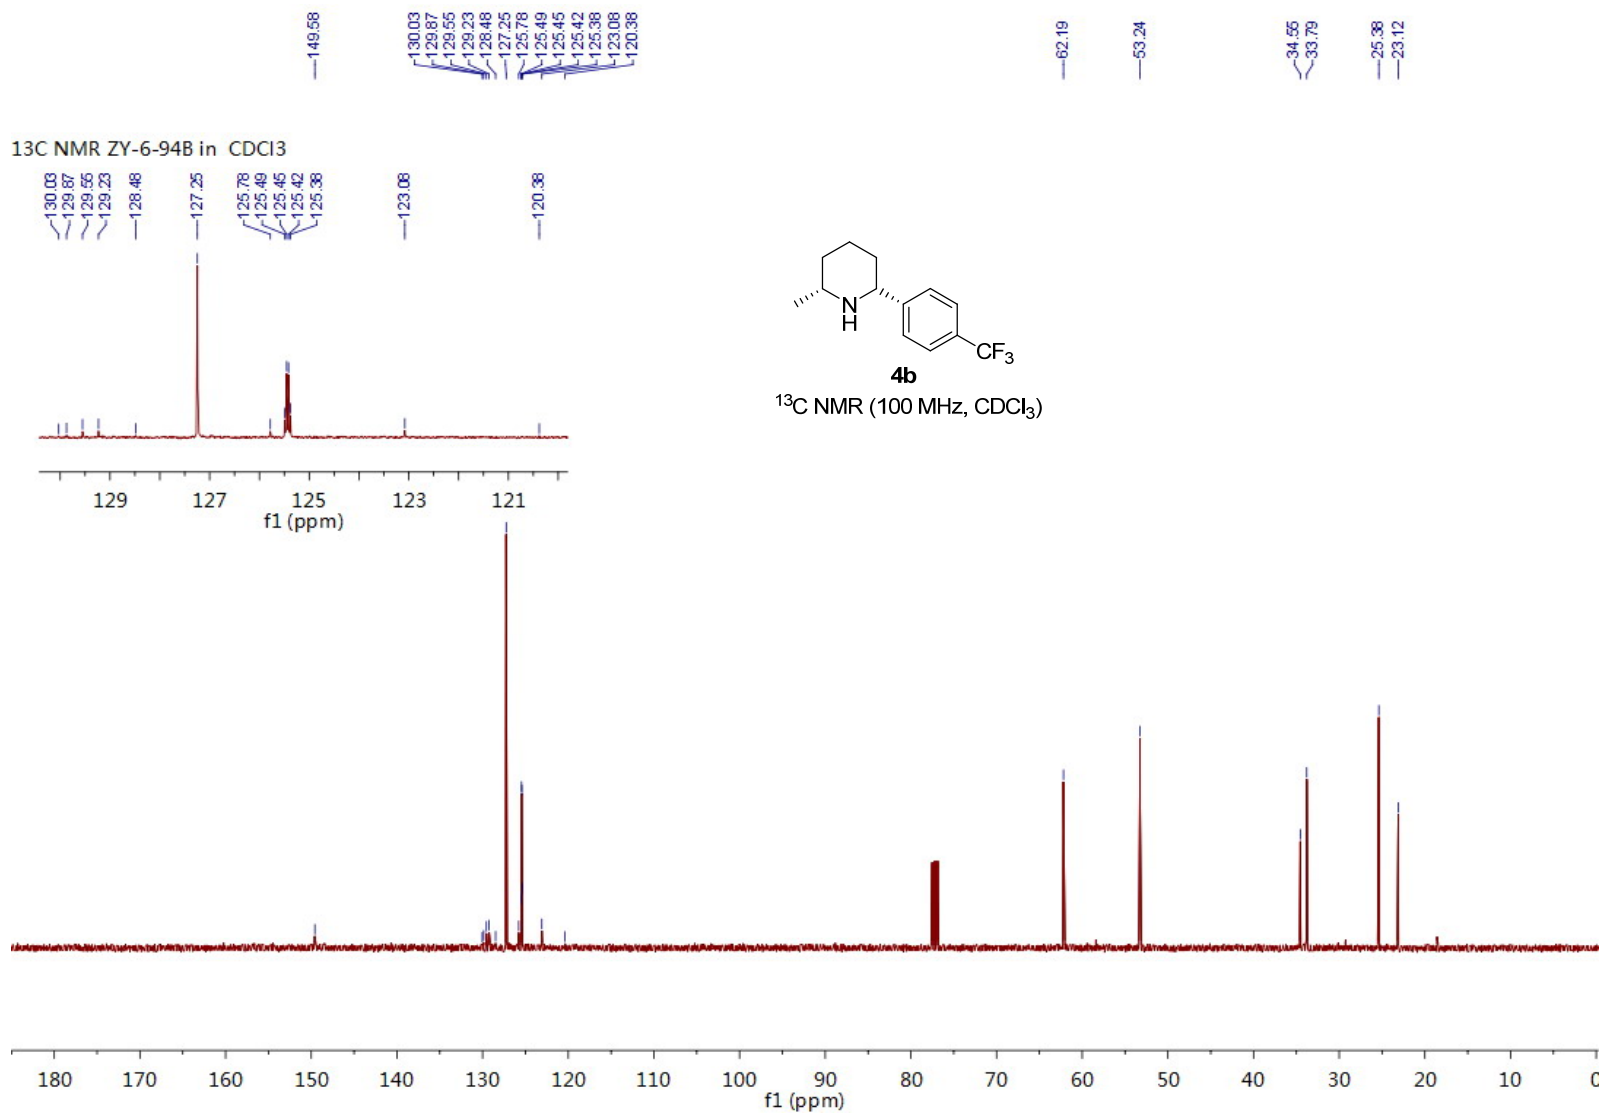

<sup>19</sup>F NMR ZY-6-94B in CDCl<sub>3</sub>

—62.3628

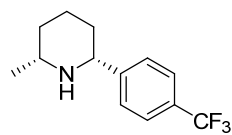

**4b**

<sup>19</sup>F NMR (376 MHz, CDCl<sub>3</sub>)

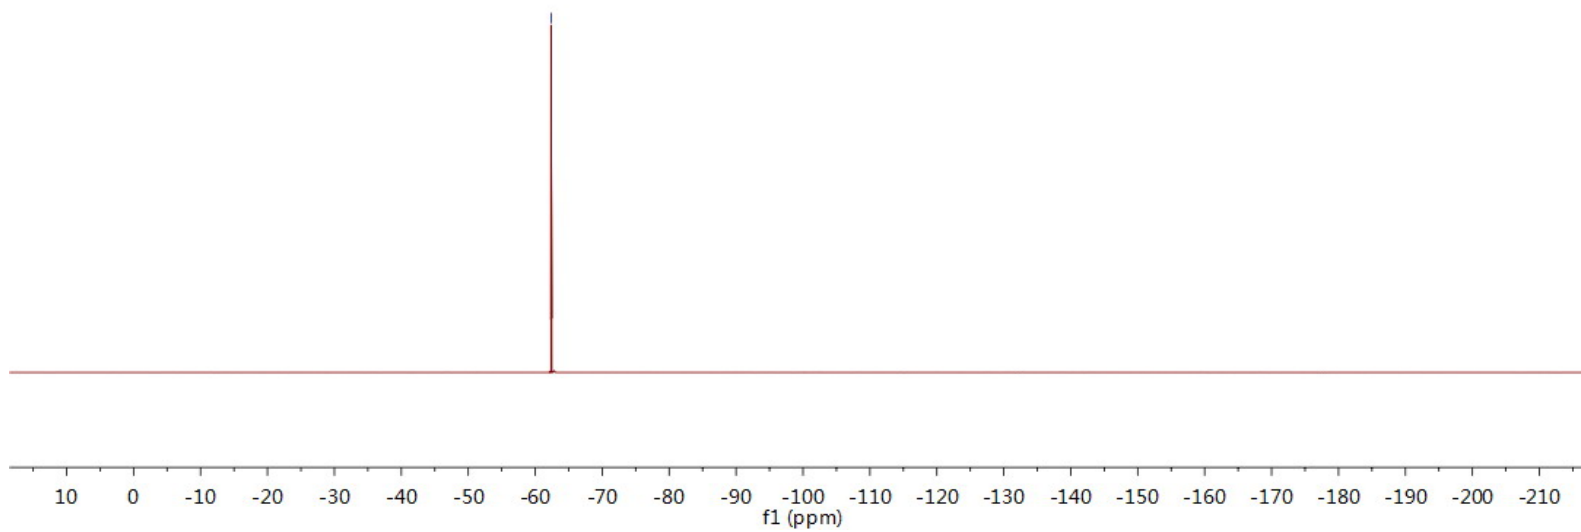

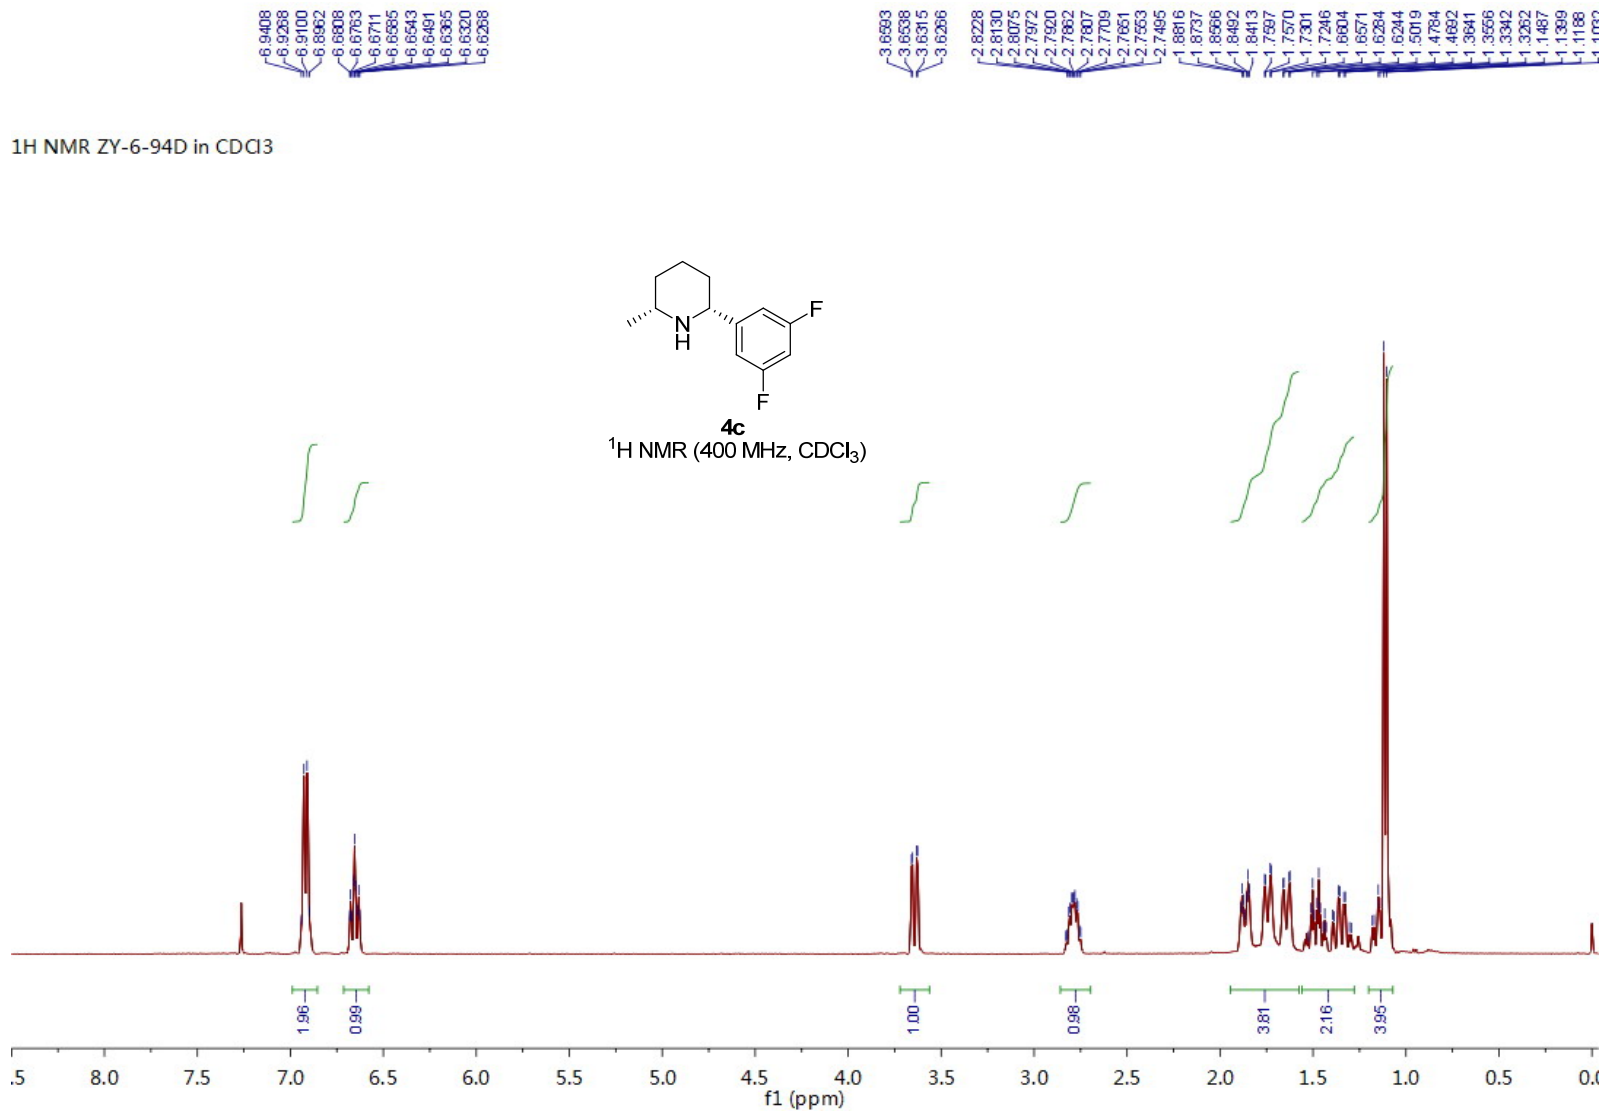

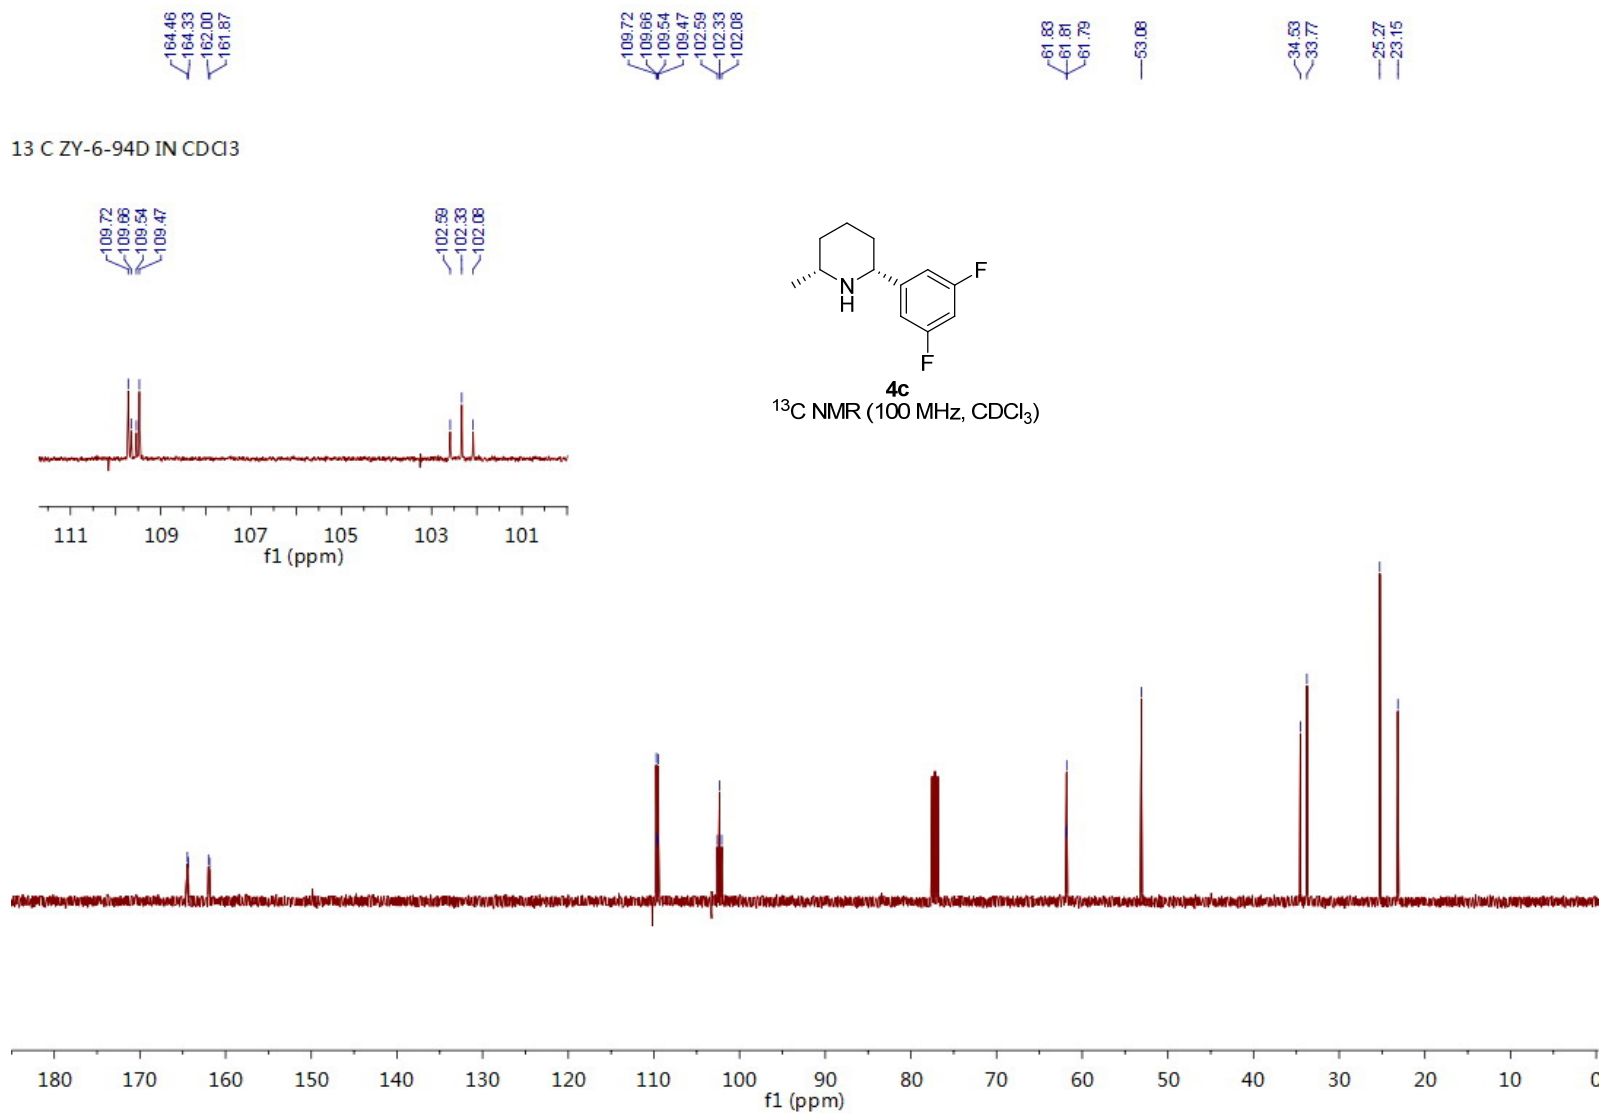

<sup>19</sup>F NMR ZY-6-94D in CDCl<sub>3</sub>

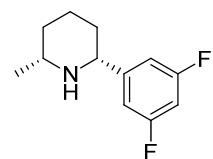

**4c**  
<sup>19</sup>F NMR (376 MHz, CDCl<sub>3</sub>)

-110.3668

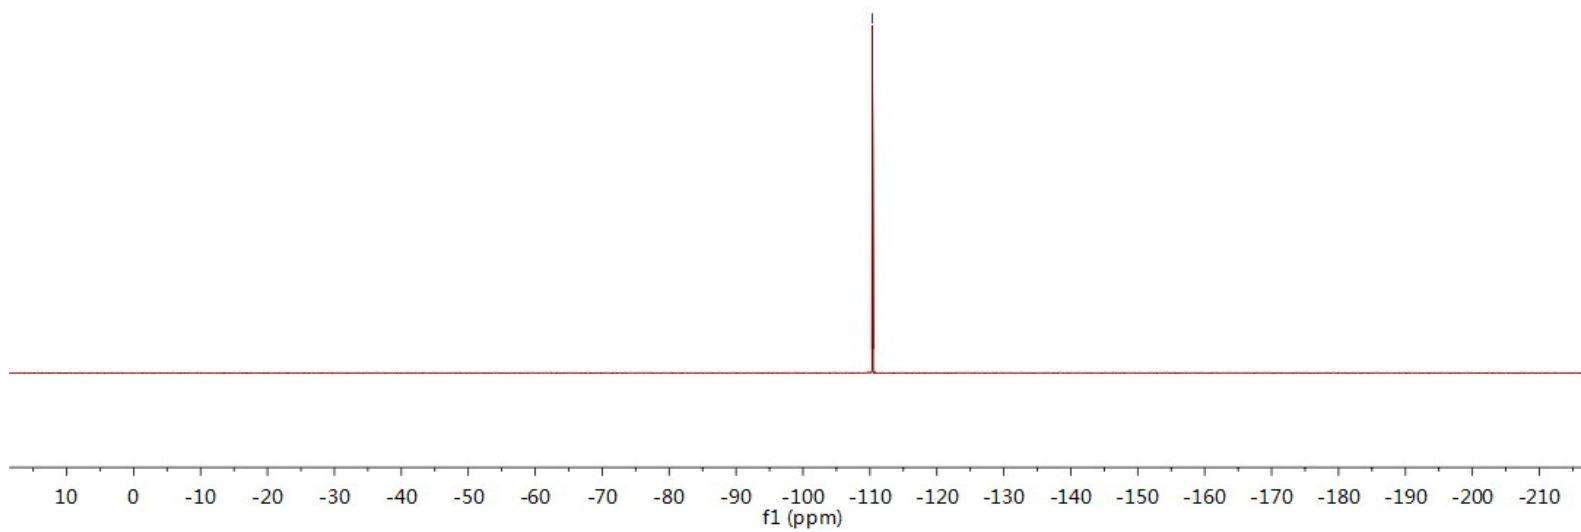



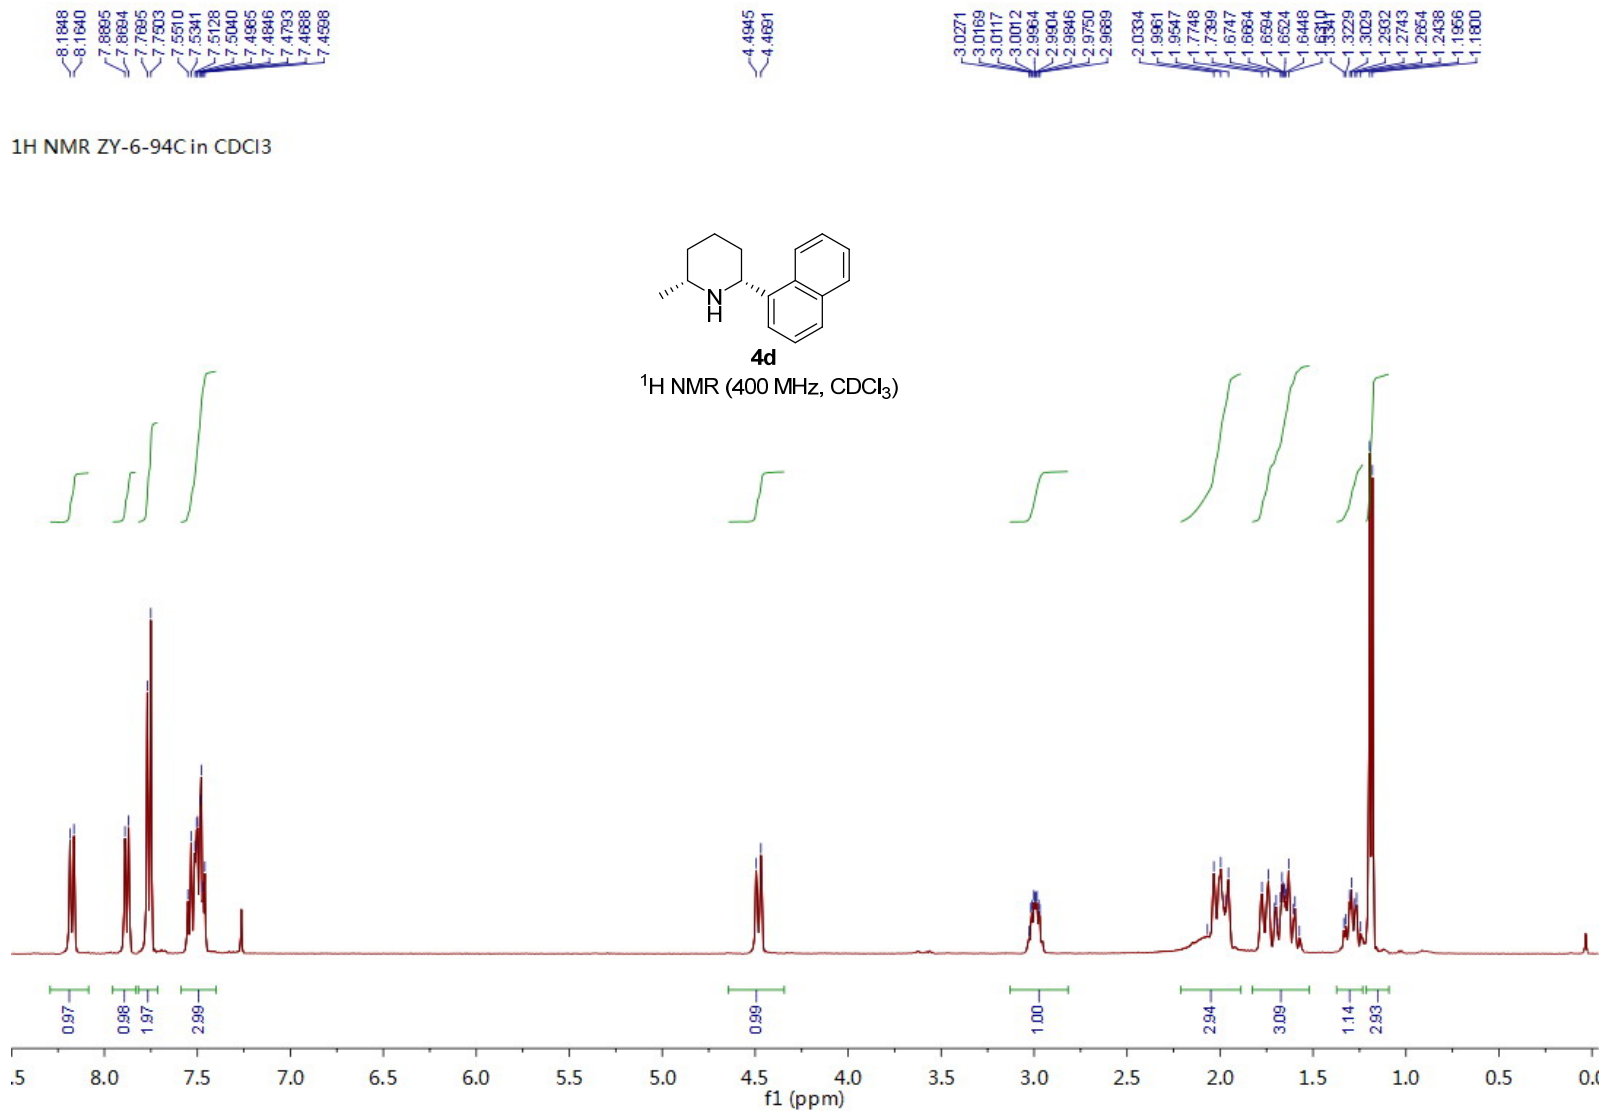

141.03  
134.03  
131.04  
129.18  
127.50  
126.01  
125.97  
125.50  
123.26  
123.07

57.89  
53.85

34.26  
33.58

25.80  
23.30

<sup>13</sup>C NMR ZY-6-94C in CDCl<sub>3</sub>

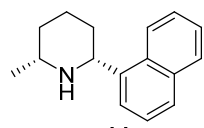

**4d**

<sup>13</sup>C NMR (100 MHz, CDCl<sub>3</sub>)

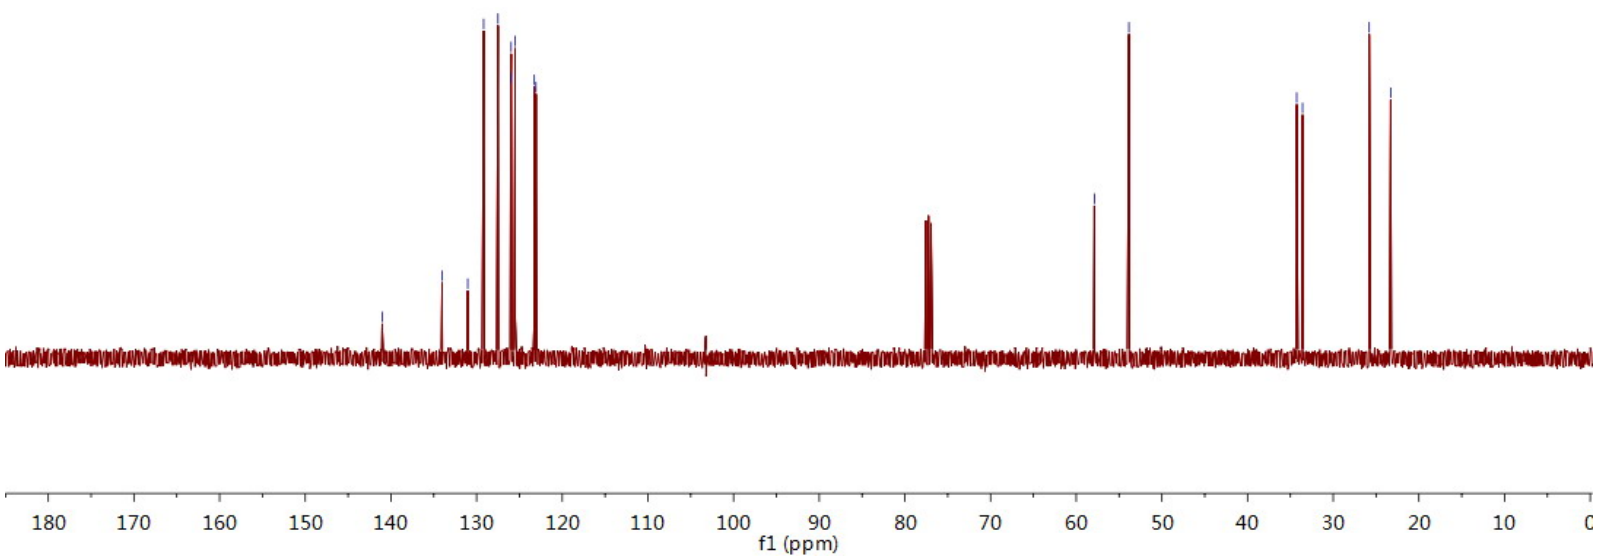

Data File C:\CHEM32\1\DATA\ZHOU-14\YZN004500.D  
 Sample Name: HC-9-22B(+)

=====  
 Acq. Operator : B  
 Acq. Instrument : Instrument 1 Location : Vial 1  
 Injection Date : 2/20/2014 4:48:53 PM  
 Acq. Method : C:\CHEM32\1\METHODS\DEF LC.M  
 Last changed : 2/20/2014 4:45:39 PM by B  
 (modified after loading)  
 Analysis Method : C:\CHEM32\1\METHODS\DEF LC.M  
 Last changed : 8/19/2014 9:15:31 AM by Z  
 (modified after loading)  
 Sample Info : 0J-H, H/i-PrOH = 90/10, 1.0 mL/min, 30 oC, 220 nm

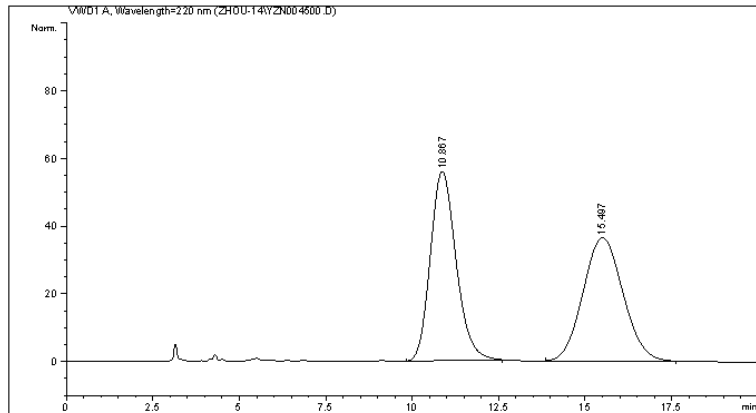

=====  
 Area Percent Report  
 =====

Sorted By : Signal  
 Multiplier: : 1.0000  
 Dilution: : 1.0000  
 Use Multiplier & Dilution Factor with ISTDs

Signal 1: VWD1 A, Wavelength=220 nm

| Peak # | RetTime [min] | Type | Width [min] | Area [mAU] | Height [mAU] | Area %  |
|--------|---------------|------|-------------|------------|--------------|---------|
| 1      | 10.867        | BB   | 0.8002      | 2896.43481 | 55.84499     | 49.6685 |
| 2      | 15.497        | BB   | 1.2362      | 2935.10034 | 36.40302     | 50.3315 |

Totals : 5831.53516 92.24801

=====  
 \*\*\* End of Report \*\*\*

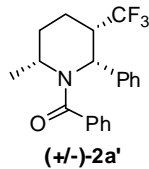

Data File C:\CHEM32\1\DATA\ZHOU-13\YZN003890.D  
 Sample Name: HC-9-58

=====  
 Acq. Operator : B  
 Acq. Instrument : Instrument 1 Location : Vial 1  
 Injection Date : 11/5/2013 8:10:19 PM  
 Acq. Method : C:\CHEM32\1\METHODS\DEF LC.M  
 Last changed : 11/5/2013 8:08:05 PM by B  
 (modified after loading)  
 Analysis Method : C:\CHEM32\1\METHODS\DEF LC.M  
 Last changed : 8/19/2014 9:15:31 AM by Z  
 (modified after loading)  
 Sample Info : 0J-H, H/i-PrOH/ = 90/10, 1.0 mL/min, 30 oC, 220 nm

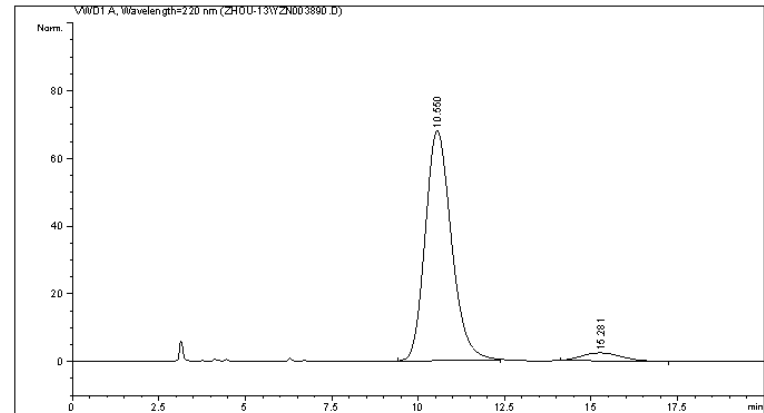

=====  
 Area Percent Report  
 =====

Sorted By : Signal  
 Multiplier: : 1.0000  
 Dilution: : 1.0000  
 Use Multiplier & Dilution Factor with ISTDs

Signal 1: VWD1 A, Wavelength=220 nm

| Peak # | RetTime [min] | Type | Width [min] | Area [mAU] | Height [mAU] | Area %  |
|--------|---------------|------|-------------|------------|--------------|---------|
| 1      | 10.550        | BB   | 0.8145      | 3575.78101 | 67.82823     | 95.1091 |
| 2      | 15.281        | BB   | 0.9337      | 183.88016  | 2.32304      | 4.8909  |

Totals : 3759.66116 70.15127

=====  
 \*\*\* End of Report \*\*\*

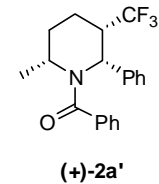

Data File C:\CHEM32\1\DATA\ZHOU-13\YZN004104.D  
 Sample Name: HC-9-74E+

=====  
 Acq. Operator : B  
 Acq. Instrument : Instrument 1 Location : Vial 1  
 Injection Date : 12/2/2013 10:29:28 AM  
 Acq. Method : C:\CHEM32\1\METHODS\DEF.LC.M  
 Last changed : 12/2/2013 10:26:24 AM by B  
 (modified after loading)  
 Analysis Method : C:\CHEM32\1\METHODS\DEF.LC.M  
 Last changed : 8/19/2014 9:24:36 AM by Z  
 (modified after loading)  
 Sample Info : AD-H, H/i-PrOH/ = 90/10, 1.0 mL/min, 30 oC, 220 nm

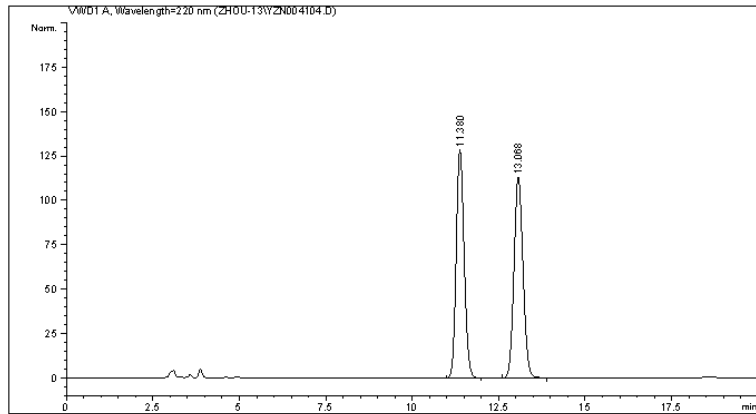

=====  
 Area Percent Report  
 =====

Sorted By : Signal  
 Multiplier: : 1.0000  
 Dilution: : 1.0000  
 Use Multiplier & Dilution Factor with ISTDs

Signal 1: VWD1 A, Wavelength=220 nm

| Peak # | RetTime [min] | Type | Width [min] | Area [mAU*s] | Height [mAU] | Area %  |
|--------|---------------|------|-------------|--------------|--------------|---------|
| 1      | 11.380        | BB   | 0.2470      | 2046.13550   | 128.45103    | 49.8448 |
| 2      | 13.068        | BB   | 0.2822      | 2058.87915   | 113.13163    | 50.1552 |

Totals : 4105.01465 241.58266

=====  
 \*\*\* End of Report \*\*\*

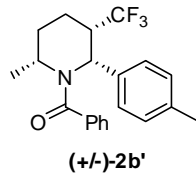

Data File C:\CHEM32\1\DATA\ZHOU-13\YZN004105.D  
 Sample Name: HC-9-74E

=====  
 Acq. Operator : B  
 Acq. Instrument : Instrument 1 Location : Vial 1  
 Injection Date : 12/2/2013 10:57:06 AM  
 Acq. Method : C:\CHEM32\1\METHODS\DEF.LC.M  
 Last changed : 12/2/2013 10:54:55 AM by B  
 (modified after loading)  
 Analysis Method : C:\CHEM32\1\METHODS\DEF.LC.M  
 Last changed : 7/11/2014 3:35:13 PM by Z  
 (modified after loading)  
 Sample Info : AD-H, H/i-PrOH/ = 90/10, 1.0 mL/min, 30 oC, 220 nm

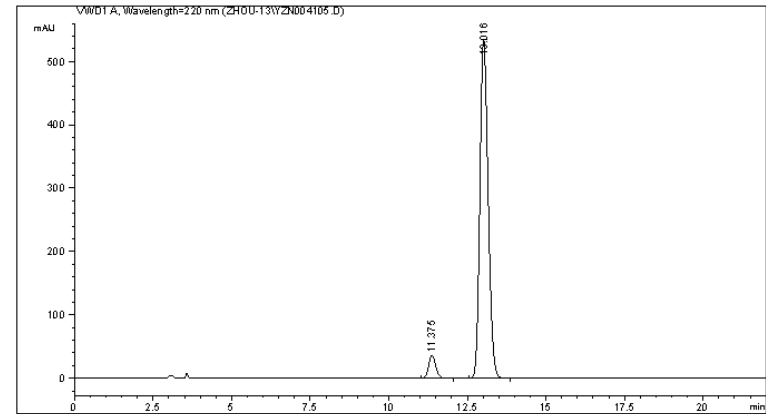

=====  
 Area Percent Report  
 =====

Sorted By : Signal  
 Multiplier: : 1.0000  
 Dilution: : 1.0000  
 Use Multiplier & Dilution Factor with ISTDs

Signal 1: VWD1 A, Wavelength=220 nm

| Peak # | RetTime [min] | Type | Width [min] | Area [mAU*s] | Height [mAU] | Area %  |
|--------|---------------|------|-------------|--------------|--------------|---------|
| 1      | 11.375        | BB   | 0.2469      | 584.09735    | 36.68600     | 5.6356  |
| 2      | 13.016        | BB   | 0.2849      | 9780.35449   | 534.22443    | 94.3644 |

Totals : 1.03645e4 570.91042

=====  
 \*\*\* End of Report \*\*\*

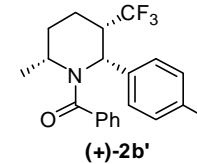

Data File C:\CHEM32\1\DATA\ZHOU-14\YZN005630.D  
 Sample Name: MC-9-76B+

=====  
 Acq. Operator : Z  
 Acq. Instrument : Instrument 1 Location : Vial 1  
 Injection Date : 7/22/2014 2:08:32 PM  
 Acq. Method : C:\CHEM32\1\METHODS\DEF.LC.M  
 Last changed : 7/22/2014 2:04:54 PM by Z  
 (modified after loading)  
 Analysis Method : C:\CHEM32\1\METHODS\DEF.LC.M  
 Last changed : 7/22/2014 3:09:32 PM by Z  
 (modified after loading)  
 Sample Info : AD-H, H/i-PrOH = 90/10, 1.0 mL/min, 30 oC, 220 nm

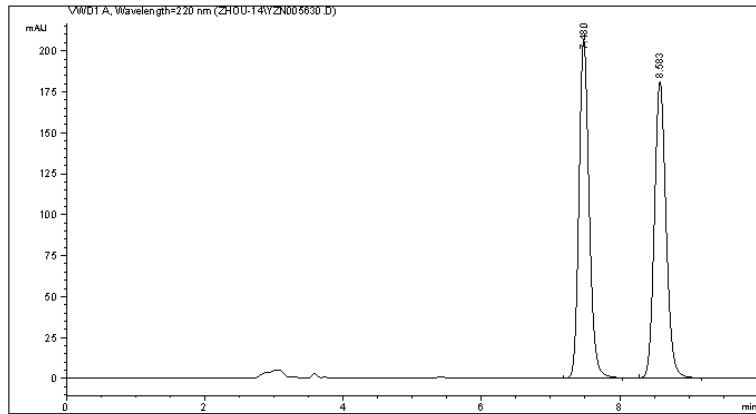

=====  
 Area Percent Report  
 =====

Sorted By : Signal  
 Multiplier: : 1.0000  
 Dilution: : 1.0000  
 Use Multiplier & Dilution Factor with ISTDs

Signal 1: VWD1 A, Wavelength=220 nm

| Peak # | RetTime [min] | Type | Width [min] | Area [mAU*s] | Height [mAU] | Area %  |
|--------|---------------|------|-------------|--------------|--------------|---------|
| 1      | 7.480         | BB   | 0.1572      | 2111.59448   | 206.49776    | 49.9787 |
| 2      | 8.583         | BB   | 0.1800      | 2113.39648   | 180.87971    | 50.0213 |

Totals : 4224.99097 387.37747

=====  
 \*\*\* End of Report \*\*\*

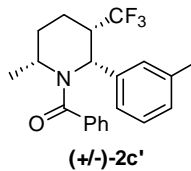

Data File C:\CHEM32\1\DATA\ZHOU-13\YZN004128.D  
 Sample Name: MC-7-76B

=====  
 Acq. Operator : B  
 Acq. Instrument : Instrument 1 Location : Vial 1  
 Injection Date : 12/3/2013 4:18:57 PM  
 Acq. Method : C:\CHEM32\1\METHODS\DEF.LC.M  
 Last changed : 12/3/2013 4:16:05 PM by B  
 (modified after loading)  
 Analysis Method : C:\CHEM32\1\METHODS\DEF.LC.M  
 Last changed : 7/11/2014 3:41:44 PM by Z  
 (modified after loading)  
 Sample Info : AD-H, H/i-PrOH/ = 90/10, 1.0 mL/min, 30 oC, 220 nm

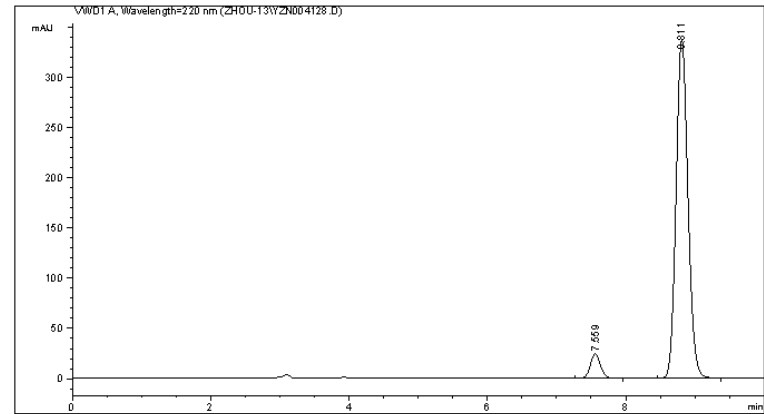

=====  
 Area Percent Report  
 =====

Sorted By : Signal  
 Multiplier: : 1.0000  
 Dilution: : 1.0000  
 Use Multiplier & Dilution Factor with ISTDs

Signal 1: VWD1 A, Wavelength=220 nm

| Peak # | RetTime [min] | Type | Width [min] | Area [mAU*s] | Height [mAU] | Area %  |
|--------|---------------|------|-------------|--------------|--------------|---------|
| 1      | 7.559         | BB   | 0.1585      | 253.18146    | 24.47709     | 5.8976  |
| 2      | 8.811         | BB   | 0.1863      | 4039.81006   | 337.31100    | 94.1024 |

Totals : 4292.99152 361.78810

=====  
 \*\*\* End of Report \*\*\*

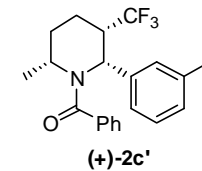

Data File C:\CHEM32\1\DATA\ZHOU-13\YZN004102.D  
 Sample Name: HC-9-74A--

=====  
 Acq. Operator : B  
 Acq. Instrument : Instrument 1 Location : Vial 1  
 Injection Date : 12/2/2013 9:31:31 AM  
 Acq. Method : C:\CHEM32\1\METHODS\DEF LC.M  
 Last changed : 12/2/2013 9:30:17 AM by B  
 (modified after loading)  
 Analysis Method : C:\CHEM32\1\METHODS\DEF LC.M  
 Last changed : 7/11/2014 3:35:13 PM by Z  
 (modified after loading)  
 Sample Info : AD-H, H/i-PrOH/ = 90/10, 1.0 mL/min, 30 oC, 220 nm

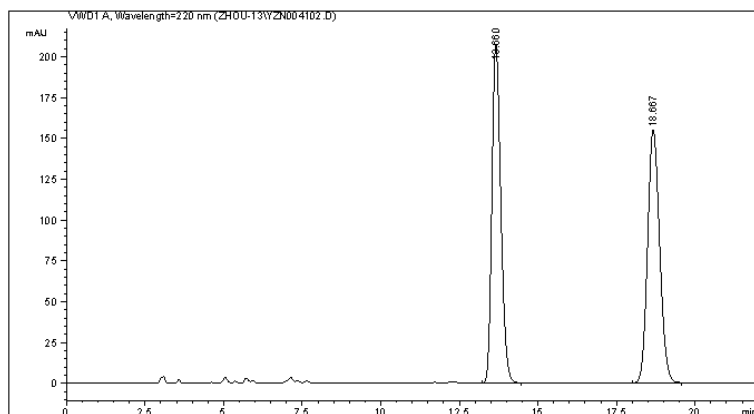

=====  
 Area Percent Report  
 =====

Sorted By : Signal  
 Multiplier: : 1.0000  
 Dilution: : 1.0000  
 Use Multiplier & Dilution Factor with ISTDs

Signal 1: VWD1 A, Wavelength=220 nm

| Peak # | RetTime [min] | Type | Width [min] | Area [mAU*s] | Height [mAU] | Area %  |
|--------|---------------|------|-------------|--------------|--------------|---------|
| 1      | 13.660        | BB   | 0.3058      | 4080.51929   | 206.94737    | 49.7482 |
| 2      | 18.667        | BB   | 0.4141      | 4121.82764   | 154.77292    | 50.2518 |

Totals : 8202.34692 361.72029

=====  
 \*\*\* End of Report \*\*\*

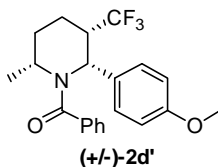

Data File C:\CHEM32\1\DATA\ZHOU-13\YZN004103.D  
 Sample Name: HC-9-74A

=====  
 Acq. Operator : B  
 Acq. Instrument : Instrument 1 Location : Vial 1  
 Injection Date : 12/2/2013 10:03:38 AM  
 Acq. Method : C:\CHEM32\1\METHODS\DEF LC.M  
 Last changed : 12/2/2013 10:02:01 AM by B  
 (modified after loading)  
 Analysis Method : C:\CHEM32\1\METHODS\DEF LC.M  
 Last changed : 7/11/2014 3:35:13 PM by Z  
 (modified after loading)  
 Sample Info : AD-H, H/i-PrOH/ = 90/10, 1.0 mL/min, 30 oC, 220 nm

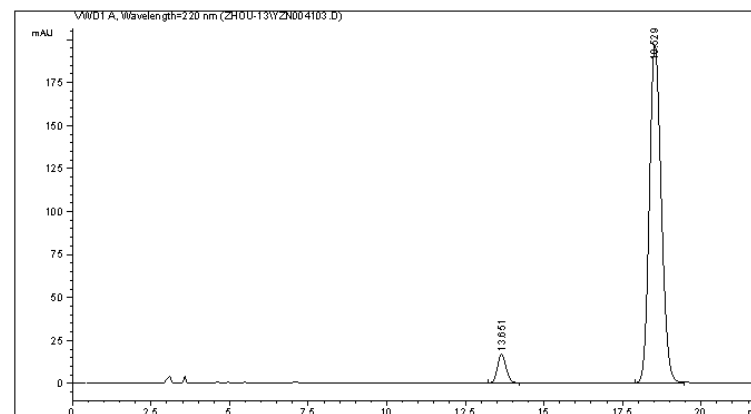

=====  
 Area Percent Report  
 =====

Sorted By : Signal  
 Multiplier: : 1.0000  
 Dilution: : 1.0000  
 Use Multiplier & Dilution Factor with ISTDs

Signal 1: VWD1 A, Wavelength=220 nm

| Peak # | RetTime [min] | Type | Width [min] | Area [mAU*s] | Height [mAU] | Area %  |
|--------|---------------|------|-------------|--------------|--------------|---------|
| 1      | 13.651        | BB   | 0.2991      | 321.29056    | 16.67215     | 5.8571  |
| 2      | 18.529        | BB   | 0.4086      | 5164.19824   | 196.44943    | 94.1429 |

Totals : 5485.48880 213.12159

=====  
 \*\*\* End of Report \*\*\*

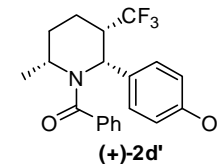

Data File C:\CHEM32\1\DATA\ZHOU-13\YZN004125.D  
 Sample Name: MC-7-76A+

=====  
 Acq. Operator : B  
 Acq. Instrument : Instrument 1 Location : Vial 1  
 Injection Date : 12/3/2013 3:05:00 PM  
 Acq. Method : C:\CHEM32\1\METHODS\DEF LC.M  
 Last changed : 12/3/2013 2:48:45 PM by B  
 (modified after loading)  
 Analysis Method : C:\CHEM32\1\METHODS\DEF LC.M  
 Last changed : 8/19/2014 10:04:46 AM by Z  
 (modified after loading)  
 Sample Info : AD-H, H/i-PrOH/ = 90/10, 1.0 mL/min, 30 oC, 220 nm

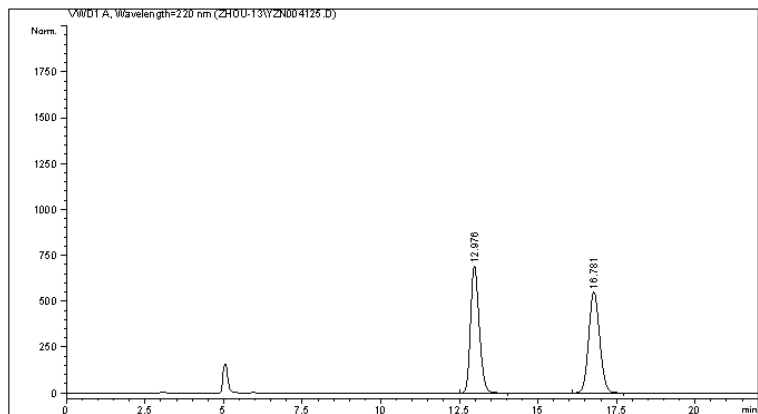

=====  
 Area Percent Report  
 =====

Sorted By : Signal  
 Multiplier: : 1.0000  
 Dilution: : 1.0000  
 Use Multiplier & Dilution Factor with ISTDs

Signal 1: VWD1 A, Wavelength=220 nm

| Peak # | RetTime [min] | Type | Width [min] | Area [mAU*s] | Height [mAU] | Area %  |
|--------|---------------|------|-------------|--------------|--------------|---------|
| 1      | 12.976        | BB   | 0.2970      | 1.32771e4    | 690.87012    | 49.9083 |
| 2      | 16.781        | VB   | 0.3779      | 1.33259e4    | 548.90643    | 50.0917 |

Totals : 2.66030e4 1239.77655

=====  
 \*\*\* End of Report \*\*\*

Data File C:\CHEM32\1\DATA\ZHOU-13\YZN004215.D  
 Sample Name: MC-9-81A

=====  
 Acq. Operator : B  
 Acq. Instrument : Instrument 1 Location : Vial 1  
 Injection Date : 12/11/2013 3:28:56 PM  
 Acq. Method : C:\CHEM32\1\METHODS\DEF LC.M  
 Last changed : 12/11/2013 3:25:08 PM by B  
 (modified after loading)  
 Analysis Method : C:\CHEM32\1\METHODS\DEF LC.M  
 Last changed : 7/11/2014 4:24:07 PM by Z  
 (modified after loading)  
 Sample Info : AD-H, H/i-PrOH/ = 90/10, 1.0 mL/min, 30 oC, 220 nm

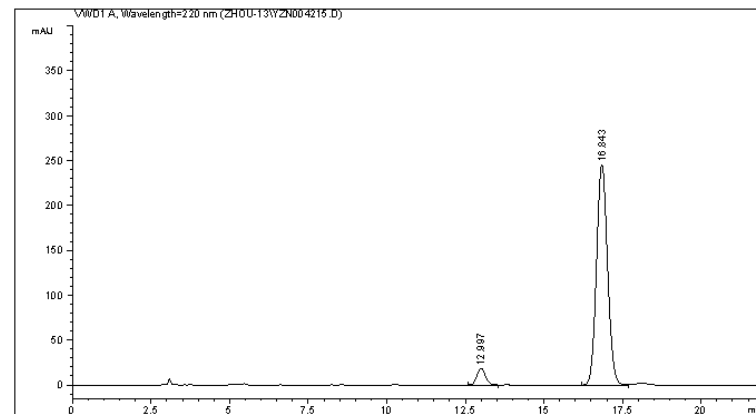

=====  
 Area Percent Report  
 =====

Sorted By : Signal  
 Multiplier: : 1.0000  
 Dilution: : 1.0000  
 Use Multiplier & Dilution Factor with ISTDs

Signal 1: VWD1 A, Wavelength=220 nm

| Peak # | RetTime [min] | Type | Width [min] | Area [mAU*s] | Height [mAU] | Area %  |
|--------|---------------|------|-------------|--------------|--------------|---------|
| 1      | 12.997        | BB   | 0.2948      | 355.76962    | 18.81668     | 5.6055  |
| 2      | 16.843        | BB   | 0.3791      | 5991.01758   | 245.72809    | 94.3945 |

Totals : 6346.78720 264.54477

=====  
 \*\*\* End of Report \*\*\*

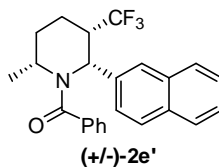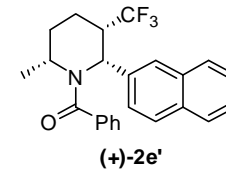

Data File C:\CHEM32\1\DATA\ZHOU-14\YZN005634.D  
 Sample Name: MC-9-97A+-

=====  
 Acq. Operator : Z  
 Acq. Instrument : Instrument 1 Location : Vial 1  
 Injection Date : 7/22/2014 5:42:07 PM  
 Acq. Method : C:\CHEM32\1\METHODS\DEF LC.M  
 Last changed : 7/22/2014 5:35:20 PM by Z  
 (modified after loading)  
 Analysis Method : C:\CHEM32\1\METHODS\DEF LC.M  
 Last changed : 7/22/2014 6:10:08 PM by Z  
 (modified after loading)  
 Sample Info : AD-H , H/i-PrOH = 90/10, 1.0mL/min, 30 oC, 220 nm

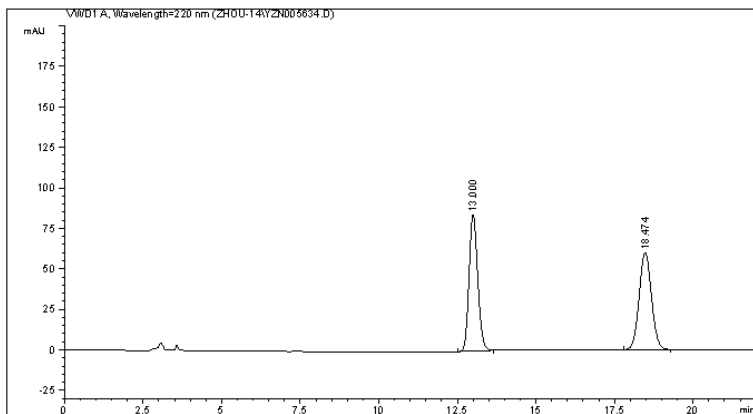

=====  
 Area Percent Report  
 =====

Sorted By : Signal  
 Multiplier: : 1.0000  
 Dilution: : 1.0000  
 Use Multiplier & Dilution Factor with ISTDs

Signal 1: VWD1 A, Wavelength=220 nm

| Peak # | RetTime [min] | Type | Width [min] | Area mAU*s | Height [mAU] | Area %  |
|--------|---------------|------|-------------|------------|--------------|---------|
| 1      | 13.000        | BB   | 0.2986      | 1622.31836 | 84.37788     | 49.8869 |
| 2      | 18.474        | BB   | 0.4235      | 1629.67590 | 59.93539     | 50.1131 |

Totals : 3251.99426 144.31327

=====  
 \*\*\* End of Report \*\*\*

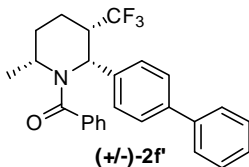

Data File C:\CHEM32\1\DATA\ZHOU-14\YZN005629.D  
 Sample Name: MC-9-97a

=====  
 Acq. Operator : Z  
 Acq. Instrument : Instrument 1 Location : Vial 1  
 Injection Date : 7/22/2014 1:38:02 PM  
 Acq. Method : C:\CHEM32\1\METHODS\DEF LC.M  
 Last changed : 7/22/2014 1:36:40 PM by Z  
 (modified after loading)  
 Analysis Method : C:\CHEM32\1\METHODS\DEF LC.M  
 Last changed : 7/22/2014 6:10:08 PM by Z  
 (modified after loading)  
 Sample Info : AD-H , H/i-PrOH = 90/10, 1.0 mL/min, 30 oC, 220 nm

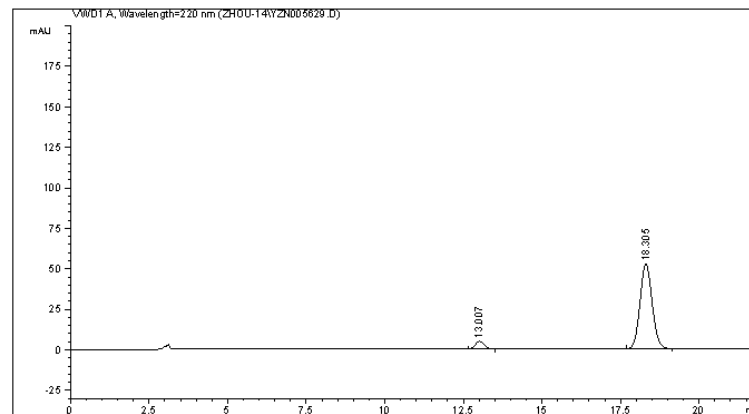

=====  
 Area Percent Report  
 =====

Sorted By : Signal  
 Multiplier: : 1.0000  
 Dilution: : 1.0000  
 Use Multiplier & Dilution Factor with ISTDs

Signal 1: VWD1 A, Wavelength=220 nm

| Peak # | RetTime [min] | Type | Width [min] | Area mAU*s | Height [mAU] | Area %  |
|--------|---------------|------|-------------|------------|--------------|---------|
| 1      | 13.007        | BB   | 0.2988      | 90.31953   | 4.72265      | 6.0443  |
| 2      | 18.305        | BB   | 0.4155      | 1403.97449 | 52.48493     | 93.9557 |

Totals : 1494.29401 57.20758

=====  
 \*\*\* End of Report \*\*\*

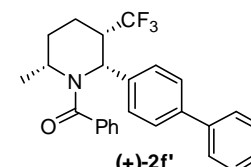



Data File C:\CHEM32\1\DATA\ZHOU-13\YZN004331.D  
 Sample Name: MC-9-97B+-

```

=====
Acq. Operator   : B
Acq. Instrument : Instrument 1          Location : Vial 1
Injection Date  : 12/31/2013 10:25:27 AM
Acq. Method    : C:\CHEM32\1\METHODS\DEF.LC.M
Last changed   : 12/31/2013 10:24:16 AM by B
                (modified after loading)
Analysis Method: C:\CHEM32\1\METHODS\DEF.LC.M
Last changed   : 7/11/2014 4:35:58 PM by Z
                (modified after loading)
Sample Info    : AD-H, H/i-PrOH/ = 90/10, 1.0 mL/min, 30 oC, 220 nm
=====
  
```

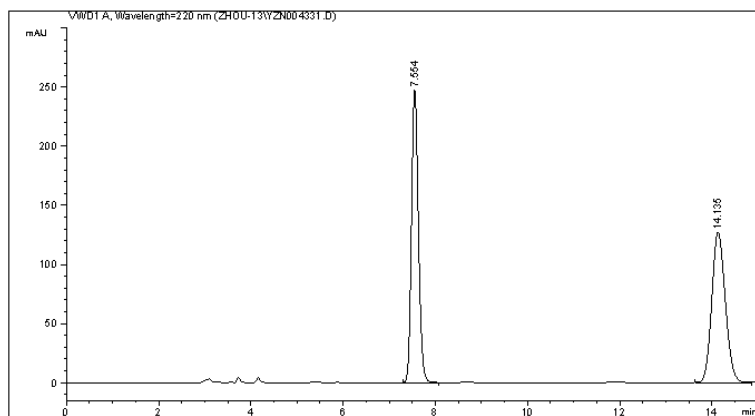

=====  
 Area Percent Report  
 =====

```

Sorted By      : Signal
Multiplier:    : 1.0000
Dilution:      : 1.0000
Use Multiplier & Dilution Factor with ISTDs
  
```

Signal 1: VWD1 A, Wavelength=220 nm

| Peak # | RetTime [min] | Type | Width [min] | Area mAU*s | Height [mAU] | Area %  |
|--------|---------------|------|-------------|------------|--------------|---------|
| 1      | 7.554         | BB   | 0.1624      | 2580.61621 | 247.43379    | 49.9413 |
| 2      | 14.135        | BB   | 0.3177      | 2586.68237 | 126.99229    | 50.0587 |

Totals : 5167.29858 374.42609

=====  
 \*\*\* End of Report \*\*\*

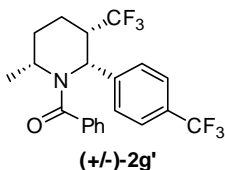

Data File C:\CHEM32\1\DATA\ZHOU-14\YZN005635.D  
 Sample Name: MC-9-97B

```

=====
Acq. Operator   : Z
Acq. Instrument : Instrument 1          Location : Vial 1
Injection Date  : 7/22/2014 6:08:19 PM
Acq. Method    : C:\CHEM32\1\METHODS\DEF.LC.M
Last changed   : 7/22/2014 6:04:17 PM by Z
                (modified after loading)
Analysis Method: C:\CHEM32\1\METHODS\DEF.LC.M
Last changed   : 7/22/2014 6:25:12 PM by Z
                (modified after loading)
Sample Info    : AD-H, H/i-PrOH = 90/10, 1.0mL/min, 30 oC, 220 nm
=====
  
```

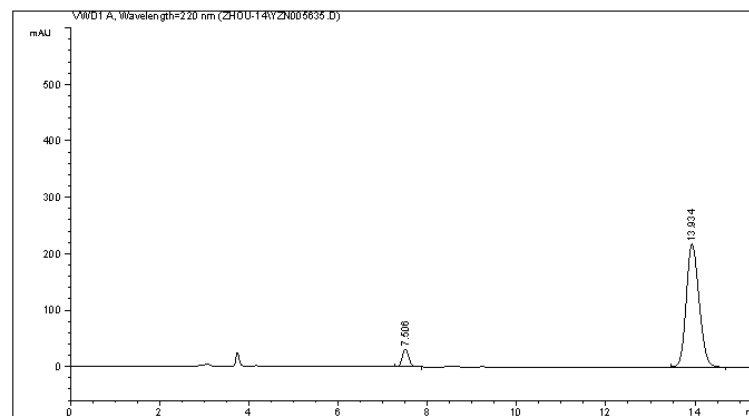

=====  
 Area Percent Report  
 =====

```

Sorted By      : Signal
Multiplier:    : 1.0000
Dilution:      : 1.0000
Use Multiplier & Dilution Factor with ISTDs
  
```

Signal 1: VWD1 A, Wavelength=220 nm

| Peak # | RetTime [min] | Type | Width [min] | Area mAU*s | Height [mAU] | Area %  |
|--------|---------------|------|-------------|------------|--------------|---------|
| 1      | 7.506         | BB   | 0.1596      | 315.96140  | 30.64944     | 6.8026  |
| 2      | 13.934        | BB   | 0.3098      | 4328.75244 | 217.05875    | 93.1974 |

Totals : 4644.71384 247.70819

=====  
 \*\*\* End of Report \*\*\*

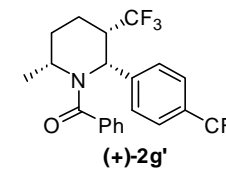

Data File C:\CHEM32\1\DATA\ZHOU-13\YZN004360.D  
 Sample Name: MC-9-98A

=====  
 Acq. Operator : B  
 Acq. Instrument : Instrument 1 Location : Vial 1  
 Injection Date : 1/3/2014 4:41:03 PM  
 Acq. Method : C:\CHEM32\1\METHODS\DEF LC.M  
 Last changed : 1/3/2014 4:36:18 PM by B  
 (modified after loading)  
 Analysis Method : C:\CHEM32\1\METHODS\DEF LC.M  
 Last changed : 8/19/2014 10:20:46 AM by Z  
 (modified after loading)  
 Sample Info : AD-H, H/1-PrOH/ = 90/10, 1.0 mL/min, 30 oC, 220nm

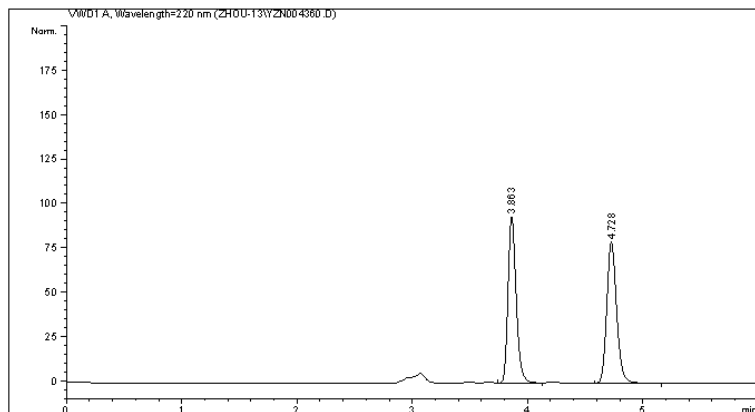

=====  
 Area Percent Report  
 =====

Sorted By : Signal  
 Multiplier: : 1.0000  
 Dilution: : 1.0000  
 Use Multiplier & Dilution Factor with ISTDs

Signal 1: VWD1 A, Wavelength=220 nm

| Peak # | RetTime [min] | Type | Width [min] | Area [mAU*s] | Height [mAU] | Area %  |
|--------|---------------|------|-------------|--------------|--------------|---------|
| 1      | 3.863         | VV   | 0.0768      | 466.23618    | 94.05981     | 49.5955 |
| 2      | 4.728         | VB   | 0.0913      | 473.84210    | 79.62459     | 50.4045 |

Totals : 940.07828 173.68440

=====  
 \*\*\* End of Report \*\*\*

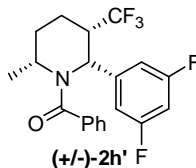

Data File C:\CHEM32\1\DATA\ZHOU-13\YZN004361.D  
 Sample Name: MC-9-98A(SHOU)

=====  
 Acq. Operator : B  
 Acq. Instrument : Instrument 1 Location : Vial 1  
 Injection Date : 1/3/2014 4:50:17 PM  
 Acq. Method : C:\CHEM32\1\METHODS\DEF LC.M  
 Last changed : 1/3/2014 4:47:46 PM by B  
 (modified after loading)  
 Analysis Method : C:\CHEM32\1\METHODS\DEF LC.M  
 Last changed : 8/19/2014 10:20:46 AM by Z  
 (modified after loading)  
 Sample Info : AD-H, H/1-PrOH/ = 90/10, 1.0 mL/min, 30 oC, 220nm

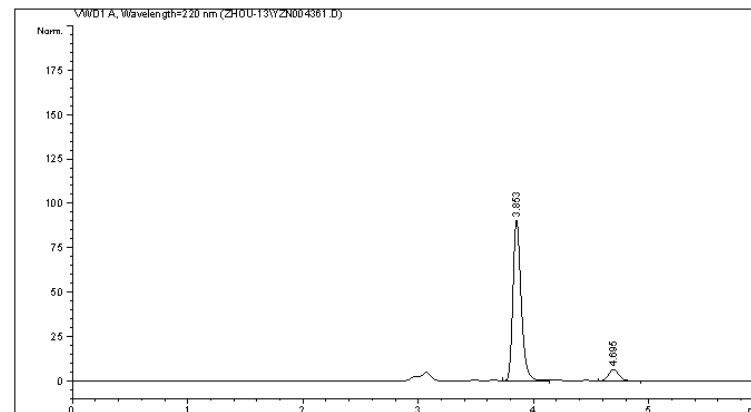

=====  
 Area Percent Report  
 =====

Sorted By : Signal  
 Multiplier: : 1.0000  
 Dilution: : 1.0000  
 Use Multiplier & Dilution Factor with ISTDs

Signal 1: VWD1 A, Wavelength=220 nm

| Peak # | RetTime [min] | Type | Width [min] | Area [mAU*s] | Height [mAU] | Area %  |
|--------|---------------|------|-------------|--------------|--------------|---------|
| 1      | 3.853         | VB   | 0.0773      | 453.13580    | 90.61848     | 91.8844 |
| 2      | 4.695         | VB   | 0.0932      | 40.02260     | 6.54235      | 8.1156  |

Totals : 493.15840 97.16082

=====  
 \*\*\* End of Report \*\*\*

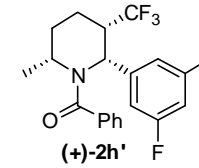

Data File C:\CHEM32\1\DATA\ZHOU-13\YZN004461.D  
 Sample Name: NC-10-12B+

=====  
 Acq. Operator : B  
 Acq. Instrument : Instrument 1 Location : Vial 1  
 Injection Date : 1/20/2014 5:00:26 PM  
 Acq. Method : C:\CHEM32\1\METHODS\DEF LC.M  
 Last changed : 1/20/2014 4:45:22 PM by B  
 (modified after loading)  
 Analysis Method : C:\CHEM32\1\METHODS\DEF LC.M  
 Last changed : 8/19/2014 10:28:34 AM by Z  
 (modified after loading)  
 Sample Info : AD-H H/i-PrOH = 90/10, 1.0 mL/min, 30 oC, 220 nm

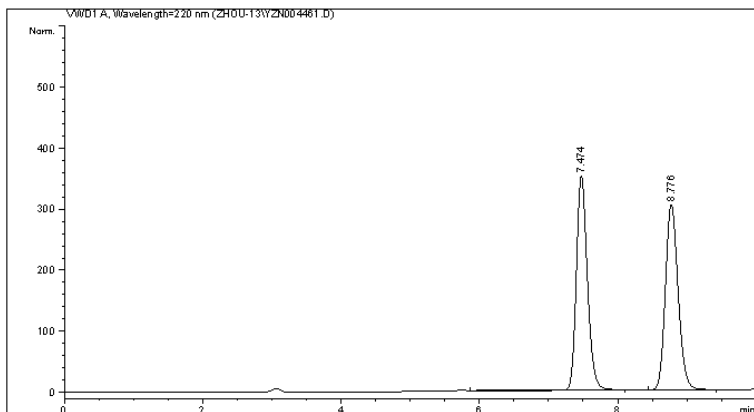

=====  
 Area Percent Report  
 =====

Sorted By : Signal  
 Multiplier: : 1.0000  
 Dilution: : 1.0000  
 Use Multiplier & Dilution Factor with ISTDs

Signal 1: VWD1 A, Wavelength=220 nm

| Peak # | RetTime [min] | Type | Width [min] | Area mAU   | Height %s | Area [mAU] | Area % |
|--------|---------------|------|-------------|------------|-----------|------------|--------|
| 1      | 7.474         | VB   | 0.1727      | 3967.80762 | 350.98093 | 50.6577    |        |
| 2      | 8.776         | BB   | 0.1966      | 3864.78101 | 303.54080 | 49.3423    |        |

Totals : 7832.58862 654.52173

=====  
 \*\*\* End of Report \*\*\*

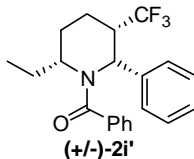

Data File C:\CHEM32\1\DATA\ZHOU-13\YZN004462.D  
 Sample Name: NC-10-12A

=====  
 Acq. Operator : B  
 Acq. Instrument : Instrument 1 Location : Vial 1  
 Injection Date : 1/20/2014 5:15:26 PM  
 Acq. Method : C:\CHEM32\1\METHODS\DEF LC.M  
 Last changed : 1/20/2014 5:13:37 PM by B  
 (modified after loading)  
 Analysis Method : C:\CHEM32\1\METHODS\DEF LC.M  
 Last changed : 8/19/2014 10:29:35 AM by Z  
 (modified after loading)  
 Sample Info : AD-H H/i-PrOH = 90/10, 1.0 mL/min, 30 oC, 220 nm

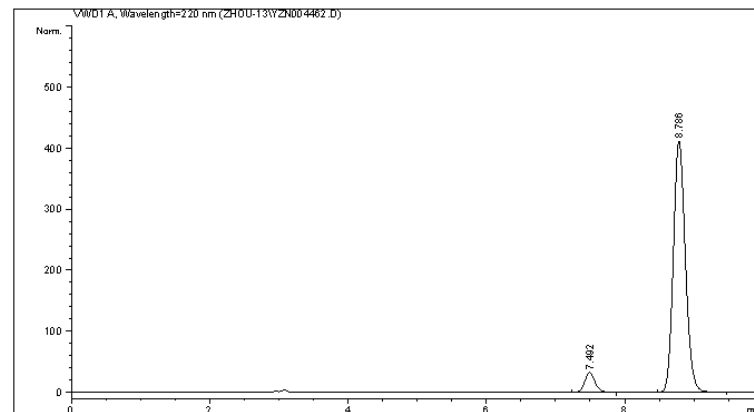

=====  
 Area Percent Report  
 =====

Sorted By : Signal  
 Multiplier: : 1.0000  
 Dilution: : 1.0000  
 Use Multiplier & Dilution Factor with ISTDs

Signal 1: VWD1 A, Wavelength=220 nm

| Peak # | RetTime [min] | Type | Width [min] | Area mAU   | Height %s | Area [mAU] | Area % |
|--------|---------------|------|-------------|------------|-----------|------------|--------|
| 1      | 7.492         | BB   | 0.1584      | 332.55539  | 32.18368  | 6.2797     |        |
| 2      | 8.786         | BB   | 0.1875      | 4963.17773 | 410.99475 | 93.7203    |        |

Totals : 5295.73312 443.17843

=====  
 \*\*\* End of Report \*\*\*

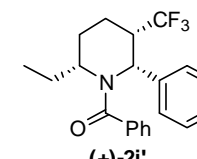

Data File G:\MC-1\YZ003590.D  
 Sample Name: ZY-6-66D (A)

```

=====
Acq. Operator   : ZX
Acq. Instrument : Instrument 1          Location : Vial 1
Injection Date  : 12/20/2012 12:13:32 PM
Acq. Method    : C:\HPCHEM\1\METHODS\SW.M
Last changed   : 12/20/2012 11:47:21 AM by ZX
                (modified after loading)
Analysis Method: C:\CHEM32\1\METHODS\DEF.LC.M
Last changed   : 8/19/2014 11:00:53 AM by Z
                (modified after loading)
Sample Info    : 0J-H, H/1-PrOH = 90/10, 1.0 mL/min, 30 oC, 220 nm
=====
  
```

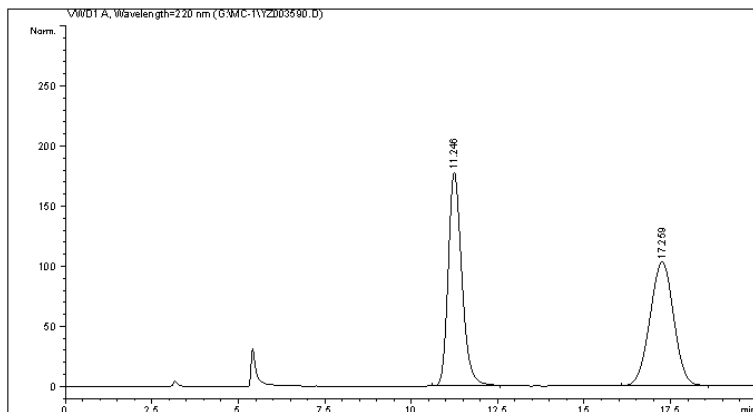

Area Percent Report

```

=====
Sorted By      : Signal
Multiplier:    : 1.0000
Dilution:      : 1.0000
Use Multiplier & Dilution Factor with ISTDs
=====
  
```

Signal 1: VWD1 A, Wavelength=220 nm

| Peak # | RetTime [min] | Type | Width [min] | Area [mAU*s] | Height [mAU] | Area %  |
|--------|---------------|------|-------------|--------------|--------------|---------|
| 1      | 11.246        | BB   | 0.4182      | 4860.72607   | 177.65092    | 49.7067 |
| 2      | 17.259        | BB   | 0.7466      | 4918.08936   | 102.95752    | 50.2933 |

Totals : 9778.81543 280.60844

\*\*\* End of Report \*\*\*

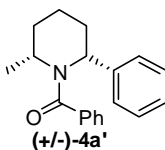

Data File G:\MC-1\YZ003758.D  
 Sample Name: ZY-6-78A

```

=====
Acq. Operator   : WH
Acq. Instrument : Instrument 1          Location : Vial 1
Injection Date  : 1/17/2013 1:49:30 AM
Acq. Method    : C:\HPCHEM\1\METHODS\SW.M
Last changed   : 1/17/2013 1:45:57 AM by WH
                (modified after loading)
Analysis Method: C:\CHEM32\1\METHODS\DEF.LC.M
Last changed   : 8/19/2014 11:00:53 AM by Z
                (modified after loading)
Sample Info    : 0J-H, H/1-PrOH = 90/10, 1.0 mL/min, 30 oC, 220 nm
=====
  
```

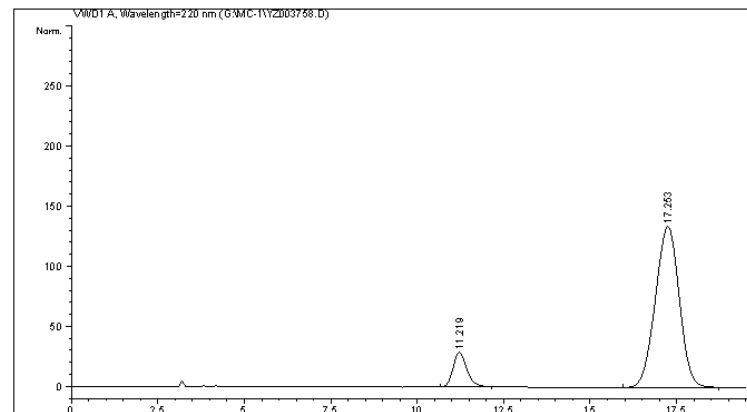

Area Percent Report

```

=====
Sorted By      : Signal
Multiplier:    : 1.0000
Dilution:      : 1.0000
Use Multiplier & Dilution Factor with ISTDs
=====
  
```

Signal 1: VWD1 A, Wavelength=220 nm

| Peak # | RetTime [min] | Type | Width [min] | Area [mAU*s] | Height [mAU] | Area %  |
|--------|---------------|------|-------------|--------------|--------------|---------|
| 1      | 11.219        | BB   | 0.4229      | 784.72314    | 28.52110     | 10.8397 |
| 2      | 17.253        | BB   | 0.7467      | 6454.58789   | 134.05344    | 89.1603 |

Totals : 7239.31104 162.57453

\*\*\* End of Report \*\*\*

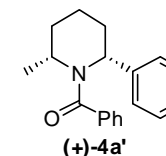

Data File G:\MC-1\YZ004011.D  
 Sample Name: ZY-6-94B(+/-)

=====  
 Acq. Operator : WH  
 Acq. Instrument : Instrument 1 Location : Vial 1  
 Injection Date : 3/14/2013 8:11:53 AM  
 Acq. Method : C:\HPCHEM\1\METHODS\SW.M  
 Last changed : 3/14/2013 8:10:18 AM by WH  
 (modified after loading)  
 Analysis Method : C:\CHEM32\1\METHODS\DEF.LC.M  
 Last changed : 8/19/2014 11:02:36 AM by Z  
 (modified after loading)  
 Sample Info : 0G, H/i-PrOH = 90/10, 1.0 mL/min, 30 oC, 220 nm

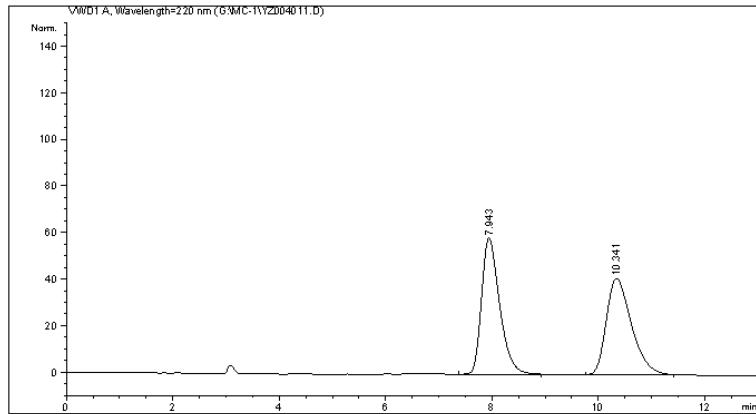

=====  
 Area Percent Report  
 =====

Sorted By : Signal  
 Multiplier: : 1.0000  
 Dilution: : 1.0000  
 Use Multiplier & Dilution Factor with ISTDs

Signal 1: VWD1 A, Wavelength=220 nm

| Peak # | RetTime [min] | Type | Width [min] | Area mAU   | Area %  | Height [mAU] | Area %  |
|--------|---------------|------|-------------|------------|---------|--------------|---------|
| 1      | 7.943         | BB   | 0.3595      | 1379.01208 | 50.4349 | 58.48378     | 50.4349 |
| 2      | 10.341        | BB   | 0.5002      | 1355.22925 | 49.5651 | 41.35931     | 49.5651 |

Totals : 2734.24133 99.84309

=====  
 \*\*\* End of Report \*\*\*

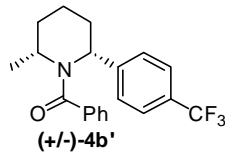

Data File G:\MC-1\YZ004027.D  
 Sample Name: ZY-6-95B

=====  
 Acq. Operator : WH  
 Acq. Instrument : Instrument 1 Location : Vial 1  
 Injection Date : 3/16/2013 3:13:49 AM  
 Acq. Method : C:\HPCHEM\1\METHODS\SW.M  
 Last changed : 3/16/2013 3:05:14 AM by WH  
 (modified after loading)  
 Analysis Method : C:\CHEM32\1\METHODS\DEF.LC.M  
 Last changed : 8/19/2014 11:03:05 AM by Z  
 (modified after loading)  
 Sample Info : 0G, H/i-PrOH = 90/10, 1.0 mL/min, 30 oC, 220 nm

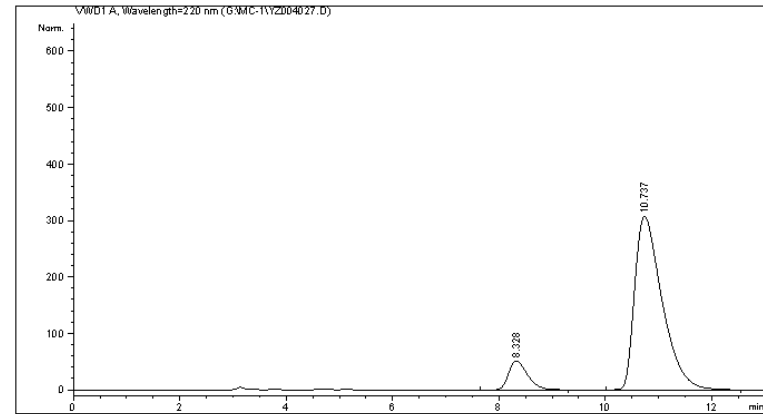

=====  
 Area Percent Report  
 =====

Sorted By : Signal  
 Multiplier: : 1.0000  
 Dilution: : 1.0000  
 Use Multiplier & Dilution Factor with ISTDs

Signal 1: VWD1 A, Wavelength=220 nm

| Peak # | RetTime [min] | Type | Width [min] | Area mAU   | Area %    | Height [mAU] | Area %  |
|--------|---------------|------|-------------|------------|-----------|--------------|---------|
| 1      | 8.328         | VB   | 0.3797      | 1302.94641 | 51.99115  | 51.99115     | 10.5523 |
| 2      | 10.737        | BB   | 0.5496      | 1.10446e4  | 307.82346 | 307.82346    | 89.4477 |

Totals : 1.23475e4 359.81461

=====  
 \*\*\* End of Report \*\*\*

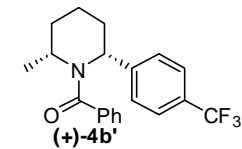

Data File C:\CHEM32\1\DATA\ZHOU-13\YZN002480.D  
 Sample Name: ZY-6-94D(±)

=====  
 Acq. Operator : WH  
 Acq. Instrument : Instrument 1 Location : Vial 1  
 Injection Date : 3/13/2013 11:06:04 AM  
 Acq. Method : C:\CHEM32\1\METHODS\DEF.LC.M  
 Last changed : 3/13/2013 10:57:01 AM by WH  
 (modified after loading)  
 Analysis Method : C:\CHEM32\1\METHODS\DEF.LC.M  
 Last changed : 8/19/2014 11:06:51 AM by Z  
 (modified after loading)  
 Sample Info : 0J-H, H/i-PrOH = 95/5, 1.0 mL/min, 30 oC, 220 nm

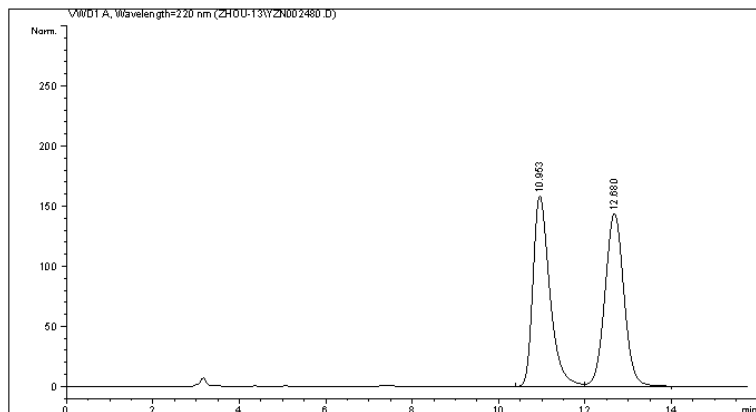

=====  
 Area Percent Report  
 =====

Sorted By : Signal  
 Multiplier: : 1.0000  
 Dilution: : 1.0000  
 Use Multiplier & Dilution Factor with ISTDs

Signal 1: VWD1 A, Wavelength=220 nm

| Peak # | RetTime [min] | Type | Width [min] | Area [mAU*s] | Height [mAU] | Area %  |
|--------|---------------|------|-------------|--------------|--------------|---------|
| 1      | 10.953        | BB   | 0.4117      | 4290.16162   | 158.61508    | 49.5040 |
| 2      | 12.680        | VB   | 0.4711      | 4376.13330   | 143.96098    | 50.4960 |

Totals : 8666.29492 302.57607

=====  
 \*\*\* End of Report \*\*\*

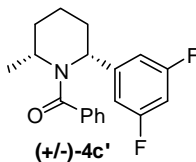

Data File G:\MC-1\YZ004021.D  
 Sample Name: ZY-6-95D

=====  
 Acq. Operator : WH  
 Acq. Instrument : Instrument 1 Location : Vial 1  
 Injection Date : 3/16/2013 1:49:45 AM  
 Acq. Method : C:\HPCHEM\1\METHODS\SW.M  
 Last changed : 3/16/2013 1:30:34 AM by WH  
 (modified after loading)  
 Analysis Method : C:\CHEM32\1\METHODS\DEF.LC.M  
 Last changed : 8/19/2014 11:06:51 AM by Z  
 (modified after loading)  
 Sample Info : 0J-H, H/i-PrOH = 95/5, 1.0 mL/min, 30 oC, 220 nm

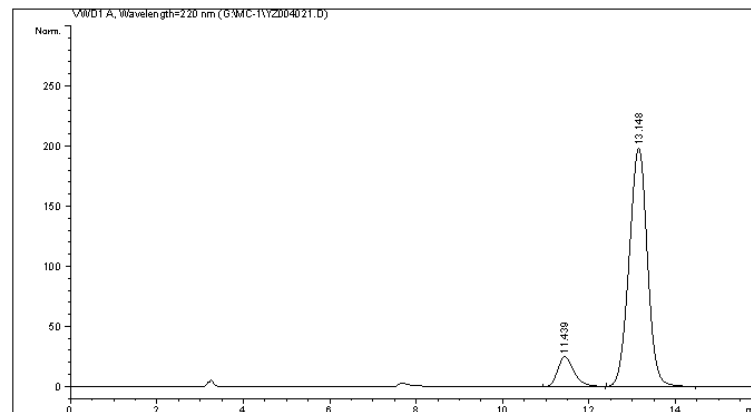

=====  
 Area Percent Report  
 =====

Sorted By : Signal  
 Multiplier: : 1.0000  
 Dilution: : 1.0000  
 Use Multiplier & Dilution Factor with ISTDs

Signal 1: VWD1 A, Wavelength=220 nm

| Peak # | RetTime [min] | Type | Width [min] | Area [mAU*s] | Height [mAU] | Area %  |
|--------|---------------|------|-------------|--------------|--------------|---------|
| 1      | 11.439        | BB   | 0.4097      | 670.86322    | 24.95699     | 10.3279 |
| 2      | 13.148        | BB   | 0.4539      | 5824.77051   | 198.83044    | 89.6721 |

Totals : 6495.63373 223.78744

=====  
 \*\*\* End of Report \*\*\*

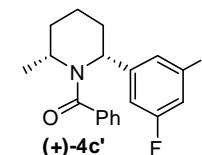

Data File G:\MC-1\YZ004003.D  
 Sample Name: ZY-6-94C(+/-)

=====  
 Acq. Operator : WH  
 Acq. Instrument : Instrument 1 Location : Vial 1  
 Injection Date : 3/14/2013 3:08:36 AM  
 Acq. Method : C:\HPCHEM\1\METHODS\SW.M  
 Last changed : 3/14/2013 3:06:37 AM by WH  
 (modified after loading)  
 Analysis Method : C:\CHEM32\1\METHODS\DEF LC.M  
 Last changed : 8/19/2014 11:05:37 AM by Z  
 (modified after loading)  
 Sample Info : OD-H, H/i-PrOH = 90/10, 1.0 mL/min, 30 oC, 220 nm

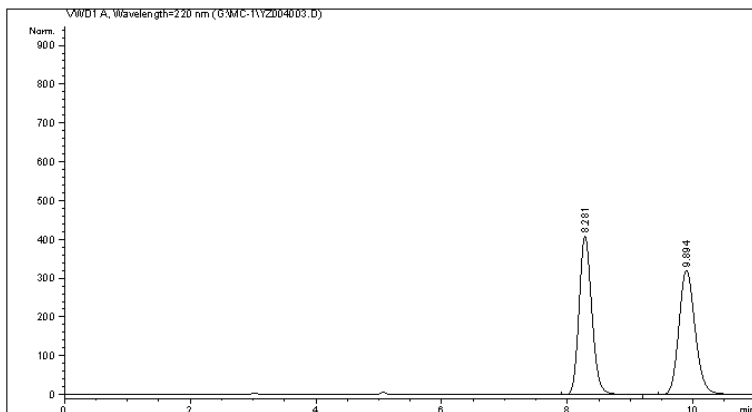

=====  
 Area Percent Report  
 =====

Sorted By : Signal  
 Multiplier: : 1.0000  
 Dilution: : 1.0000  
 Use Multiplier & Dilution Factor with ISTDs

Signal 1: VWD1 A, Wavelength=220 nm

| Peak # | RetTime [min] | Type | Width [min] | Area [mAU*s] | Height [mAU] | Area %  |
|--------|---------------|------|-------------|--------------|--------------|---------|
| 1      | 8.281         | BB   | 0.2186      | 5766.77051   | 408.44028    | 50.0429 |
| 2      | 9.894         | BB   | 0.2764      | 5756.89063   | 320.75250    | 49.9571 |

Totals : 1.15237e4 729.19278

=====  
 \*\*\* End of Report \*\*\*

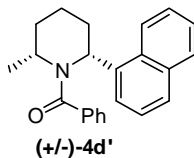

Data File G:\MC-1\YZ004023.D  
 Sample Name: ZY-6-95C

=====  
 Acq. Operator : WH  
 Acq. Instrument : Instrument 1 Location : Vial 1  
 Injection Date : 3/16/2013 2:25:33 AM  
 Acq. Method : C:\HPCHEM\1\METHODS\SW.M  
 Last changed : 3/16/2013 2:09:09 AM by WH  
 (modified after loading)  
 Analysis Method : C:\CHEM32\1\METHODS\DEF LC.M  
 Last changed : 8/19/2014 11:04:48 AM by Z  
 (modified after loading)  
 Sample Info : OD-H, H/i-PrOH = 95/5, 1.0 mL/min, 30 oC, 220 nm

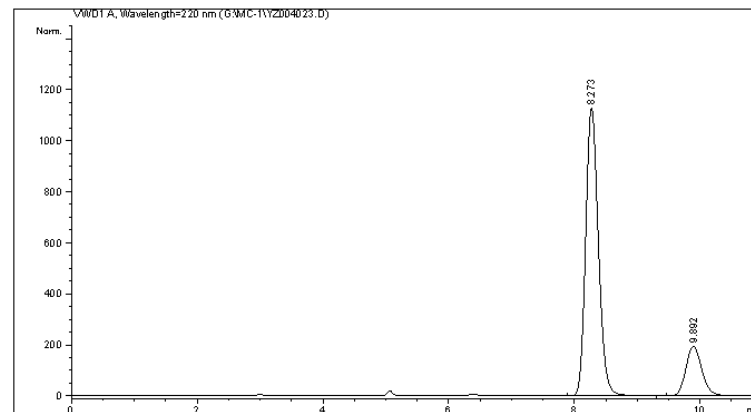

=====  
 Area Percent Report  
 =====

Sorted By : Signal  
 Multiplier: : 1.0000  
 Dilution: : 1.0000  
 Use Multiplier & Dilution Factor with ISTDs

Signal 1: VWD1 A, Wavelength=220 nm

| Peak # | RetTime [min] | Type | Width [min] | Area [mAU*s] | Height [mAU] | Area %  |
|--------|---------------|------|-------------|--------------|--------------|---------|
| 1      | 8.273         | VB   | 0.2180      | 1.58589e4    | 1127.39514   | 82.0934 |
| 2      | 9.892         | BB   | 0.2761      | 3459.23022   | 194.30327    | 17.9066 |

Totals : 1.93182e4 1321.69841

=====  
 \*\*\* End of Report \*\*\*

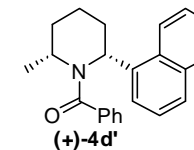

Data File C:\CHEM32\1\DATA\ZHOU-14\YZN005559.D  
 Sample Name: MC-10-4A+

=====  
 Acq. Operator : Z  
 Acq. Instrument : Instrument 1 Location : Vial 1  
 Injection Date : 7/17/2014 1:39:15 PM  
 Acq. Method : C:\CHEM32\1\METHODS\DEF.LC.M  
 Last changed : 7/17/2014 1:29:16 PM by Z  
 (modified after loading)  
 Analysis Method : C:\CHEM32\1\METHODS\DEF.LC.M  
 Last changed : 8/19/2014 10:29:35 AM by Z  
 (modified after loading)  
 Sample Info : OD-H, H/i-PrOH = 95/5, 0.9 mL/min, 30 oC, 220 nm

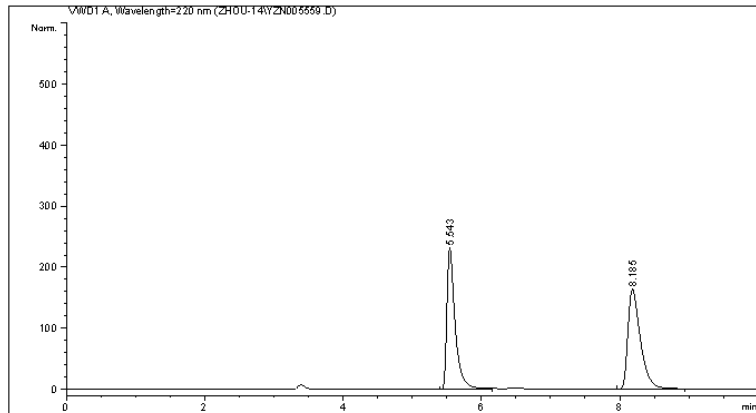

=====  
 Area Percent Report  
 =====

Sorted By : Signal  
 Multiplier: : 1.0000  
 Dilution: : 1.0000  
 Use Multiplier & Dilution Factor with ISTDs

Signal 1: VWD1 A, Wavelength=220 nm

| Peak # | RetTime [min] | Type | Width [min] | Area [mAU*s] | Height [mAU] | Area %  |
|--------|---------------|------|-------------|--------------|--------------|---------|
| 1      | 5.543         | VB   | 0.1213      | 1909.90576   | 230.73236    | 48.3532 |
| 2      | 8.185         | BB   | 0.1885      | 2039.99951   | 162.72169    | 51.6468 |

Totals : 3949.90527 393.45406

=====  
 \*\*\* End of Report \*\*\*

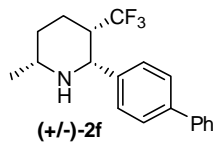

Data File C:\CHEM32\1\DATA\ZHOU-13\YZN004425.D  
 Sample Name: MC-104B2

=====  
 Acq. Operator : B  
 Acq. Instrument : Instrument 1 Location : Vial 1  
 Injection Date : 1/13/2014 9:50:42 AM  
 Acq. Method : C:\CHEM32\1\METHODS\DEF.LC.M  
 Last changed : 1/13/2014 9:48:38 AM by B  
 (modified after loading)  
 Analysis Method : C:\CHEM32\1\METHODS\DEF.LC.M  
 Last changed : 8/19/2014 10:29:35 AM by Z  
 (modified after loading)  
 Sample Info : OD-H, H/i-PrOH/ = 95/5, 0.9 mL/min, 30 oC, 220 nm

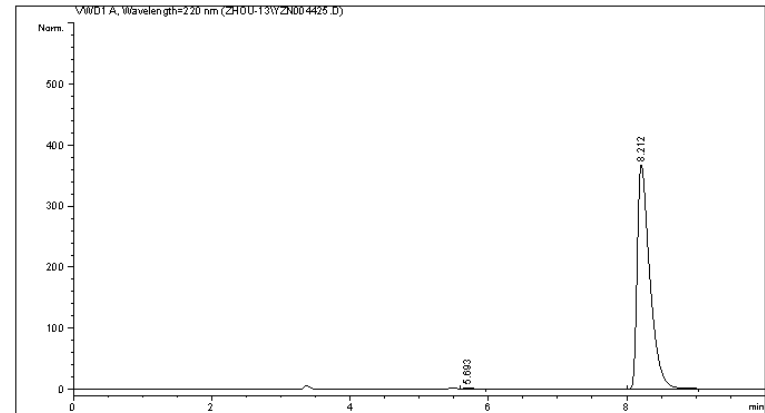

=====  
 Area Percent Report  
 =====

Sorted By : Signal  
 Multiplier: : 1.0000  
 Dilution: : 1.0000  
 Use Multiplier & Dilution Factor with ISTDs

Signal 1: VWD1 A, Wavelength=220 nm

| Peak # | RetTime [min] | Type | Width [min] | Area [mAU*s] | Height [mAU] | Area %  |
|--------|---------------|------|-------------|--------------|--------------|---------|
| 1      | 5.693         | VB   | 0.1367      | 20.57336     | 2.26167      | 0.4422  |
| 2      | 8.212         | BB   | 0.1894      | 4632.18896   | 367.08691    | 99.5578 |

Totals : 4652.76232 369.34858

=====  
 \*\*\* End of Report \*\*\*

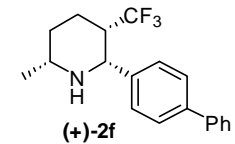

Supplement: c5qo00069f1.pdf [file c5qo00069f1.pdf]
